# Supplementary material for: Functional Annotation Of Hypothetical Proteins From The Bacillus Paralicheniformis Strain Bac84 Reveals Proteins with Biotechnological Potentials – an In Silico Approach
Source: Research Square preprint supplement (doi:10.21203/rs.3.rs-1862992/v1), 2022-07-18
Supplement: Supplementary file 1 [file 3ea13bfadbf06cdcddf7e7eb.xlsx]

## Sheet: Final table
		Supplementary Table S2 : List of bioinformatics tools and databases used.
		Analysis	Bioinformatic tools	Version	URL
		Functional Annotation	Pfam	35	https://pfam.xfam.org/
			InterPro	89	https://www.ebi.ac.uk/interpro/
			CATH	4.3	http://www.cathdb.info/search/by_sequence
			SUPERFAMILY	2	https://supfam.org/
			SMART	9	http://smart.embl-heidelberg.de/
			ScanProsite	*	https://prosite.expasy.org/scanprosite/
			CDD	3.19	https://www.ncbi.nlm.nih.gov/Structure/cdd/wrpsb.cgi
		Gene Ontology	Argot2.5	2.5	http://www.medcomp.medicina.unipd.it/Argot2-5/form.php
		Sequence Allignment	BlastP	*	https://blast.ncbi.nlm.nih.gov/Blast.cgi?PAGE=Proteins
		Search Essential Genes	DEG	*	http://www.essentialgene.org/
		Physical_x0002_Chemical Characterization	ProtParam	*	https://web.expasy.org/protparam/
		Subcellular Localization	PSORTb	3.0.3	https://www.psort.org/psortb/
			CELLO	2.5	http://cello.life.nctu.edu.tw/
			SOSUI	1.1	https://harrier.nagahama-i-bio.ac.jp/sosui/
			HMMTOP	2	http://www.enzim.hu/hmmtop/html/submit.html
			TMHMM	2	https://services.healthtech.dtu.dk/service.php?TMHMM-2.0
			SignalP	5	https://services.healthtech.dtu.dk/service.php?SignalP-5.0
		Protein-Protein Interaction Network	STRING	11.5	https://string-db.org/
			Cytoscape	3.9.1	https://cytoscape.org/
		Tertiary Structure Prediction	SWISS-MODEL	*	https://swissmodel.expasy.org/interactive
			Chimera	1.16	https://www.cgl.ucsf.edu/chimera/
		Validation Check	ROC Analysis	*	http://www.rad.jhmi.edu/jeng/javarad/roc/JROCFITi.html
		* Information not avaiable
