# Supplementary material for: Functional Annotation Of Hypothetical Proteins From The Bacillus Paralicheniformis Strain Bac84 Reveals Proteins with Biotechnological Potentials – an In Silico Approach
Source: Research Square preprint supplement (doi:10.21203/rs.3.rs-1862992/v1), 2022-07-18
Supplement: Supplementary file 2 [file 5c5b47c3f2b987e90c306576.xlsx]

## Sheet: DEG search
Supplementary Table S5 : Result of essential gene prediction using DEG database.
No.	Query HP	No. of homologs in DEG	DEG AC Number	DEG prediction
1	WP_158700706.1	No results	No results	No results
2	WP_230368348.1	No results	No results	No results
3	WP_095290960.1	No results	No results	No results
4	WP_026579962.1	No results	No results	No results
5	WP_224146215.1	No results	No results	No results
6	WP_095291534.1	No results	No results	No results
7	WP_003179940.1	No results	No results	No results
8	WP_020449960.1	No results	No results	No results
9	WP_105981192.1	No results	No results	No results
10	WP_020453622.1	No results	No results	No results
11	WP_006638778.1	No results	No results	No results
12	WP_003180123.1	No results	No results	No results
13	WP_025810847.1	No results	No results	No results
14	WP_020450411.1	No results	No results	No results
15	WP_105980832.1	No results	No results	No results
16	WP_009328837.1	No results	No results	No results
17	WP_003180732.1	No results	No results	No results
18	WP_199792123.1	No results	No results	No results
19	WP_020451108.1	No results	No results	No results
20	WP_020451191.1	No results	No results	No results
21	WP_026579751.1	No results	No results	No results
22	WP_105980957.1	No results	No results	No results
23	WP_023857538.1	No results	No results	No results
24	WP_020451915.1	No results	No results	No results
25	WP_020452052.1	No results	No results	No results
26	WP_026579290.1	No results	No results	No results
27	WP_020452371.1	No results	No results	No results
28	WP_234026546.1	No results	No results	No results
29	WP_023855527.1	1	DEG10470163	hypothetical protein, Bacillus thuringiensis BMB171
30	WP_105981186.1	No results	No results	No results
31	WP_105981199.1	1	DEG10470195	hypothetical protein; Bacillus thuringiensis BMB171
32	WP_003185659.1	No results	No results	No results
33	WP_023857076.1	No results	No results	No results
34	WP_023856950.1	No results	No results	No results
35	WP_026580354.1	No results	No results	No results
36	WP_023856884.1	No results	No results	No results
37	WP_020453535.1	No results	No results	No results
