# Supplementary material for: Functional Annotation Of Hypothetical Proteins From The Bacillus Paralicheniformis Strain Bac84 Reveals Proteins with Biotechnological Potentials – an In Silico Approach
Source: Research Square preprint supplement (doi:10.21203/rs.3.rs-1862992/v1), 2022-07-18
Supplement: Supplementary file 3 [file 661b10725b19356fd505fc80.xlsx]

## Sheet: Sheet2
		Supplementary Table S4 : List of selected HPs from the Bacillus paralicheniformis strain Bac84.
No.	AA	Fasta sequences
1	45	>WP_158700706.1 MULTISPECIES: hypothetical protein [Bacillus] MKTFDLLLKGASVVCPEGVRKTDIGVKDGMIAVLGVLDGSASIHF
2	52	>WP_230368348.1 hypothetical protein [Bacillus paralicheniformis] MSIYYVSARLGHADIETTSSTYAHLIKELRERDENETVNIFEEMAIEEAEIA
3	60	>WP_095290960.1 hypothetical protein [Bacillus paralicheniformis] MAFKSALSRKKVIAGRFSLDLKKEKMQREIAKELGISRIEKRTLMKMFHEFYRAEKEKRK
4	61	>WP_026579962.1 MULTISPECIES: hypothetical protein [Bacillus] MENYYVTVFDTGGETLLNERFEAADDEEAKEKGRGMLKEKQFLEHTHRVVHSSGKIIVFRS
5	69	>WP_224146215.1 hypothetical protein [Bacillus paralicheniformis] MLNDWYCFIRQNNIQNATKLREEIKNILPNMKENQNVLLYFNLIDSRFKLMTENYKESGDLLNDIKSIA
6	70	>WP_095291534.1 YqzH family protein [Bacillus paralicheniformis] MDEKLIEKMLGQALKQYGRNVATDPLSPGEKEILKMALQERRIEEPNEGLHAHIEDVIYDYVTNQGLFSF
7	81	>WP_003179940.1 MULTISPECIES: hypothetical protein [Bacillus] MPEFENLVQGQMEIMDKLLYLQAEIERCQKIEKELAALEKKAQLLSIREDISQKRKDLAQIQDLFQKQTEQVIQAYQRIEA
8	86	>WP_020449960.1 MULTISPECIES: hypothetical protein [Bacillus] MQKHRRRNTTAFTVMSYFTFFAGVFLFGIGLYNADNLQLNEKGYYIAVMILVAVGAILTQKVTRDNAEDNEIIAEQERRQNLSSGE
9	88	>WP_105981192.1 hypothetical protein [Bacillus paralicheniformis] MNLNNFLKADREKAERLFISTRDLISELPAAIEDHDFEGCVEIAATIISHCKDLKRMEHPEQVVRLREIASKFAGRGLNVSAVGRPFQ
10	88	>WP_020453622.1 MULTISPECIES: hypothetical protein [Bacillus] METVLIFASVLSPIILALVELVKKTFKVPKNLIPLVSLLIGLLIGAAAYPFTDLELVLRLWSGGLAGLTATGLFEIGKNRNARKKKNP
11	93	>WP_006638778.1 MULTISPECIES: hypothetical protein [Bacillus] MSESSATTEILIRLPEALVSELDGVVMQDNGSRNELIYQATKMYLRERKNRQIRESMRRGYMEMAKINLNISSEAQFAEYEAENTVERLVSGG
12	96	>WP_003180123.1 MULTISPECIES: hypothetical protein [Bacillus] MELVRIFKEHNVFGWVSVGTAILSLFVLNLAILSDTIAYSYKMLPFAMAAVPLGIIELFIKKGRTGLGFLGVVLNIFILVCVWTIVSIDTNLQLGF
13	295	>WP_025810847.1 MULTISPECIES: hypothetical protein [Bacillus] MQIRMTEYHVPNPESGPYGIAVCANGRIWFTEQKGNRIGMLTESGDITEYTIPTKSAGASIITPGISGELWFTEYKAGKIGKMTPQGEITEYALPLGTAPFGIAVGCDDAMWYTDMAGHQIGRLSSSGEITEYKLPKPGAFPSFITRGADDALWFTQNQSGSIGRITADGDISEYPLPGEQSGPVGITAGPDGALWFTEINENQIGRIAVSGKISEYPLPTANARPHAITAGGDGALWFTEWGAGQIGRITVNGDITEYPIPTAESEPHGIAAGPAQSIWFAEECGRIGKISILD
14	126	>WP_020450411.1 MULTISPECIES: hypothetical protein [Bacillus] MKKILFSVFVLAGSLLLAFNFAGEASAKTKKVSGYITWYNGVGKVGADGKRLGHWDCATKMGFDVPRKGTKIRAYSKAKPKKVITVYKYDVGRMPGAVLDVSPKAFRALGFPTSKGKVAGHYTYKK
15	209	>WP_105980832.1 hypothetical protein [Bacillus paralicheniformis] MELRLQIAPAILNRIPSFKVGAVLYQDIEITGSPQMLKGRLRLFQESLFFDYADRSPEDEMAVKEWHDAFRELNPSYSGRESGLERMLKDIKEQRFVEPENSAIDLSRFFSLKYLIPVHIYDARKLNGPIKIEPGSPGEIITFSDDAGAFGTITGNLSLHHAGTDTKDALQLVFFRPSLSIEESRRLLESLTKMFEQIHGGEHISTVFP
16	185	>WP_009328837.1 MULTISPECIES: hypothetical protein [Bacillus] MGKKKMLLGVTGTIGAINLPQFIYTLRDEYDIDVILTENAQRFLSPRAIRPFVQGVYENVFSDCSSKILHVELVNEIDRFLILPTSAATLSKIANGAANDLLSLSVLNYSEAIYIAPNMNNEMWNNPAVQKNVKIIKEFGHIFVNTTSLGIKASSGEIVQTEAGLPDPDELLKLLSEKGTVLSKS
17	151	>WP_003180732.1 MULTISPECIES: hypothetical protein [Bacillus] MKLPLTKKERSNLRTAKVKIKNTAYMDLSVLAHTLGSSLERAAYIKALAQFQTAPSIGPKMAQCAVDLGYYSLGDIKHESGADLIIRLEKLKGYWEDPCAEDALRCIVHYANDPESAKSWWDFTEERKMYRERCGYPPDRPSTPWYEKKRT
18	863	>WP_199792123.1 hypothetical protein [Bacillus paralicheniformis] MKAQTELKWLNRAPAAFGGVTWGVPWAKGVLQKGETVAIASKNAPCLQTWPLAYWPDGSLKWTGHATVFPKESGSRFTLKKGGAGVPKTVMNVSEQKDEITVNTGAIVCRLGKSGTELIRSISISGEMMAKEGRLIALKEKRSGSDSQCMYHIERFESMIKRTAIEQNGPVKTVVKIEGVHRGGGIDVWLPFTVRLSFYAGDPSIRIVHTIFIDCEAETAWIKGLGFEMSAVLSGAPRNRHIRYAADGGIYGEASQLLVTRRFNETNGLYERQIAGQPVPEKSAVVRDAERNAVWNDFKLIQDSPVHWRLKKRTGKGCAWVDAIHGERAKGLM…
19	104	>WP_020451108.1 MULTISPECIES: hypothetical protein [Bacillus] MIDDGIALERKIKRKIYQEDIHSLQLYVKEVTAAIDELRQESSSILKAHQMYINGWRGQAREMYDALLDDLDRAESRVYDRLRAIKEQASEEIERLQLKAEELT
20	153	>WP_020451191.1 MULTISPECIES: YkyB family protein [Bacillus] MDDHNHTKELKPTVENLSKAIYTVNRHAKTATNPKYLYLLKKKALQKLLNEGKGKKVGLHFSKNPRFSQQQSDVLISLGDYFFHMPPTKEDFASLPHLGTLNHSYRNPKAHMSLNIAKQLLQNYTGIKEKPLVTNRKRPASKPVFKKLGESYF
21	121	>WP_026579751.1 MULTISPECIES: hypothetical protein [Bacillus] MNDQLATIHTELLQMKEELEARLFEYSFFQQDSQGINSYQQVTLMYHVKEELQDVLLALSKIENGTYGICEETNQAIPLEKMAILPTARTANDFLYHAQFEKKTLPIWAETDETFNRALYS
22	205	>WP_105980957.1 hypothetical protein [Bacillus paralicheniformis] MGKMDEIILVVLRENVFANETLTFQGVNSDGEKVGKIMAHIEQHFSEMRRGDAEEDPAFKQPIPYVVIKREDEIFVYERLEGGGEARLHNKLSLGFGGHMNFAEGLDFSGILKLNTDRELDEELLIEESDKEKMVTLGLINDDENSVGKVHIGILSALELKPGAHVEVKEKEQIAGRWMKASDLKDKSVYDRLESWSQFVVDILV
23	104	>WP_023857538.1 MULTISPECIES: hypothetical protein [Bacillus] MAEKQKRVPFFKKYWVSQIGVFLLSQIIFITFETTGWIPNYREIDGTLFGRITESSIFIEWFTFYETPQLNLLTVFFGVFFLVPGIISALKNVFSPRHYSNSSK
24	139	>WP_020451915.1 MULTISPECIES: hypothetical protein [Bacillus] MDFKENDNHSLSKKDEIQEAVEQLFYNSPFHDILNSFQKLISDQLQNSTISMNIREENEALHVDIAVPESFQNGDIMIEAKSRYLHVALKEKKESGGSSSFTSLSRTVLLPYPVREETMKTSWNRNILTVSFPEQKKHE
25	107	>WP_020452052.1 MULTISPECIES: hypothetical protein [Bacillus] MQLEITAQAKQAIQRATEPYPDKKIQLRYDSEGCGCAVSGVPVLWLTDELSGSCEPLETNGLPIYIQSSQKVFFDEAMTIDYYEKAGALMLKSPAQVLSPRMSILVK
26	216	>WP_026579290.1 MULTISPECIES: hypothetical protein [Bacillus] MFQQQPMRNQPGPQMPQRPGRALMPRHPGMRMQPPQAQQRGLQQMFQPMGAAQEQAGARGGGGIQGLLSKILPGSAASGGTGAGLGGTGSGLGGIQGLANPATISNMLGNVQKALGVAQQVTPMIQQYGPLVRNLPGMVKMFRQLNSDDTEAEDSEQQKDEPDNKTETSGEKKEEIKVSSKTPEKSKAEEIRKKRSRSAPPSAKRKTGGSKPKLYV
27	314	>WP_020452371.1 MULTISPECIES: hypothetical protein [Bacillus] MHSQFETRAEHLTKHARFFEYTTASDPIGSGIISPIPVKEFGPELYETGETRIIPLDISEELKTEYPASSPSLLAHFIKIRSGDTIHTAPRATSELYYIVSGAGRTEAGEDTIHWQKGDFLTLPAGSSSQHTAAEDAAIYYITDSPLLHYLGVKPSESRFQPTIYTAEQAKAKLAEAAAAPDARFRNRISVLLNNDIFDQTLTITHVLWAMFGIVPPGSNQAPHSHKSVALDFVAYAAPGTYTLVGSKIDPATKEIIDPKRIDWVTGKAFITPPGLWHSH HNESGEAAYIIPIQDAGLQTYLRTLDIQFQHYEK
28	191	>WP_234026546.1 hypothetical protein [Bacillus paralicheniformis] MNTELKDMLQSVLKEELSPINQRLDGIDKRLDKIDARFVEVDKRFDEVDARFAEIDKRFDEVDARFAEIDKRFDEVDARFVEIDKRFDEVDARFVGVDKRFNAIDKRFKEIDGRLNKVENRLNAMDKRLNRLETDIDELK RGQERLPKTIIENIGQFTENIVEHADDKAAALNDRVFSVETAIQRIYRLSS
29	372	>WP_023855527.1 MULTISPECIES: hypothetical protein [Bacillus] MNEEVEAKAAYEKAAGLLNQWYTMIKRHEALQAVSLRYEIRNLLSKMEKNRDLELYFQLLDYRCKLMMEQFAESAELFRKIKRQKETVKNADDIIQYYFFFFSGMYEFYEKNYLEAISCYKKAEMKLHKLTDEIEKAEFY YKLATAYYQIDDHFRSLNYSEKALSLFSKHKEYIDKTIGCEMILGSVQFELFRIKQAEEHYGRALDQAVSLQNRRIIGLIYHNMGLNYAKCSMPLLAEEHFRKALSIGVHEQSVFGINTLFELSHLMYKNGSPEEARRLC KEGFTRAAEQGEDEYAAKFRLIFALYDAGHPLDIELSLEYMSDKRLWPHVAELTK…
30	171	>WP_105981186.1 hypothetical protein [Bacillus paralicheniformis] MAFVGFEESAEVRQLAESLIDEHHPHLKDAKEHVGFYIREGNSKWAGKAKKCTAFERHMTDYMLFVFINKEAWKTMNQEQRAALVDHELCHFTRVEWEEPDPNDSSKWVTMYGPGEDPDSWGIREHDVEEFSEIIERHGLWEKGIESFAAAVREADYQMNIDDVHRLQRVK
31	487	>WP_105981199.1 hypothetical protein [Bacillus paralicheniformis] MKKLVLLMLVLLVVYPHVSKAGGFKGGGGDPGHWFAGDPVEHPDPAKPPIVFVHGLNGSSSAWFDENDMAEQAWKNGYDAAFIDLHPDKDMQDNGAMLAAKLREIYQHFGRKVILVSYSKGGIDSQSALIHHNAYHYVERLITLGTPHHGSQLADLAYSSWAGWLADILGQKNAAVYSLQTGFMKSFRDQTDNHPNRSKTKYFTLAGNKIGGFGSVLFFGGVYLNMFGENDGAVTEKNARLPYATNLNTGKWDHFSIIKGNLTFPVFMPLLTVQAYANETAAIKENLSYPFIRGGENHGLREEEFAVEKGVKEITVHWLSNHSSGNIKLTDPH…
32	117	>WP_003185659.1 MULTISPECIES: hypothetical protein [Bacillus] MKRASIVREKKYYELVEQLKVRSQDVTFSATKAVGLLMLFSRYLVNYTSVESVEDINEDCAELYFNYLMDNHKRLGINLTDIKRSMQLIGDILDVEVNHYLKDFSLSNVTLWMSQEK
33	147	>WP_023857076.1 MULTISPECIES: hypothetical protein [Bacillus] MFYQLRLAEMKDMNAIEAFLKKAGTSHKGIEEAKSQFIMMEDPPDEIVACLGMEEFENKKGLLRSLVVSDKLSQGHIVSLFQSMQVLCEKRGIQTLYLVANKRTSMDFLEVLGFKQAAAIPEELDGSEHVSDSLSVNGAVLMEKTSN
34	157	>WP_023856950.1 MULTISPECIES: hypothetical protein [Bacillus] MLKRKFIGKMGVGLLTSAALFSFILPTEEASATFFRNAPTLHVETVDSNKEWTTSDIEVTYKPNSFVGASYVEFNFPYRFHANTRDSLNGRTLNYTQILNDGQTVRVPVYAFSSSAFKLVMVRKTLPNAGTHRVTAELQK FGRNYNHAEATVDILPR
35	117	>WP_026580354.1 MULTISPECIES: hypothetical protein [Bacillus] MKKRYRYYRLDADTVNQLKDMDKRLSGPLPADLDAFEQDGHGLSGDFYEYFALVAGSLGYVLADKKMPKVQRQSLEKTFFEVYPKNKIENYPETFHVVAMHENVRRLLCSIVNRRKT
36	360	>WP_023856884.1 MULTISPECIES: hypothetical protein [Bacillus] MRYIWIGMILCFLSASLAVGCIKAEDQSDDDKNDEALQPAEHFVYHHLMSDQGLIKTSFSDQPVYLSESLGLWMEFLISKKDGEHFHEQYQHLTESFLMKNNLVSWQIQNGQASGVNALIDDLRIMVSLDQAAALWGNSEYKQTALNIGSALKTHNMNNGILTDFYDSASQSASKDITLSYIMPDALSVLKKNGVIDKDTERRNANILYRAPLKNGFLPKVYSTETKAYTYDHEVNLIDQLYTAWHLPPKDQKAAVLADWLKQTFQTGGKLYGRYSIDTKKPAVQYESPSVYALAILFFINQNEDQDVIKALYDRMNDFEILDSSETYYGGYMSGND…
37	188	>WP_020453535.1 MULTISPECIES: hypothetical protein [Bacillus] MISTKVQEEQAVMIVHTLGPKGTNCEKAGLLWLKNKGVRGEVRLYETLEEALPHVKSTENSVLLGCAVYPFLHQIVFENLADLKIIDSFVMPTYNMVFAAKQHTMASDIQTVASHPAPAHLAKLFSSQVQFVTSNAQAALACASNAADGCITTIKAADEHRLKVIQDFGEVPMCFTIHGLKSIEGGSR
