# Supplementary material for: Functional Annotation Of Hypothetical Proteins From The Bacillus Paralicheniformis Strain Bac84 Reveals Proteins with Biotechnological Potentials – an In Silico Approach
Source: Research Square preprint supplement (doi:10.21203/rs.3.rs-1862992/v1), 2022-07-18
Supplement: Supplementary file 4 [file 76ead7c0c1ee6959d07481ac.xlsx]

## Sheet: BlastP
	Supplementary Table S6 : Results of the Blastp search for similar sequences against non-reduntant (nr) database.
No.	HPs ID	Organism	Query cover	e-value	Identity	Product
1	WP_158700706.1	Bacillus	1	1e-22	1	hypothetical protein
		Bacillus licheniformis LMG 7559	1	6e-17	0.9111	hypothetical protein
2	WP_230368348.1	Bacillus haynesii	0.75	8e-19	1	hypothetical protein
		Bacillus glycinifermentans	0.75	7e-16	0.9744	site-specific integrase
		Bacillus	0.75	7e-16	0.9744	site-specific integrase
		Bacillus licheniformis	0.75	8e-16	0.9744	site-specific integrase
		Bacillus sonorensis	0.75	8e-16	0.9744	site-specific integrase
		Bacillus velezensis	0.75	2e-15	0.9487	site-specific integrase
		Bacillus amyloliquefaciens	0.75	2e-15	0.9487	site-specific integrase
3	WP_095290960.1	No hits found with another strain of the Bacillus genus
4	WP_026579962.1	Bacillus	1	7e-27	1	hypothetical protein
		Bacillus licheniformis	0.8	5e-17	1	hypothetical protein
		Bacillus haynesii	1	3e-26	0.9672	hypothetical protein
5	WP_224146215.1	Bacillus licheniformis	1	1e-38	0.9855	tetratricopeptide repeat protein
		Bacillus swezeyi	1	1e-38	0.9855	tetratricopeptide repeat protein
		Bacillus subtilis group	1	1e-38	0.9855	tetratricopeptide repeat protein
6	WP_095291534.1	Bacillus	1	3e-43	0.9857	YqzH family protein
		Bacillus licheniformis	0.98	7e-42	0.971	YqzH family protein
		Bacillus glycinifermentans	0.98	4e-38	0.8986	YqzH family protein
7	WP_003179940.1	Bacillus	1	2e-36	1	hypothetical protein
		Bacillus amyloliquefaciens	0.9	1e-30	1	hypothetical protein
		Bacillus licheniformis	1	2e-36	0.9877	hypothetical protein
		Bacillus sp. B19-2	1	6e-36	0.9877	hypothetical protein
8	WP_020449960.1	Bacillus	1	1e-55	1	hypothetical protein
		Bacillus licheniformis	1	6e-55	0.9884	hypothetical protein
		Bacillus swezeyi	1	2e-54	0.9767	hypothetical protein
		Bacillus glycinifermentans	1	2e-50	0.9186	hypothetical protein
		Bacillus subtilis group	0.83	1e-38	0.9028	hypothetical protein
9	WP_105981192.1	Bacillus sp. GbtcB13	1	2e-54	0.9545	hypothetical protein
		Bacillus subtilis group	1	2e-54	0.9545	hypothetical protein
		Bacillus licheniformis	0.69	1e-32	0.9344	hypothetical protein
10	WP_020453622.1	Bacillus	1	4e-30	1	hypothetical protein
		Bacillus swezeyi	1	3e-26	0.9205	hypothetical protein
11	WP_006638778.1	Bacillus	1	3e-59	1	hypothetical protein
		Bacillus licheniformis DSM 13 = ATCC 1	1	1e-58	0.9892	antitoxin NdoAI
		Bacillus sp. WMMC1349	1	3e-58	0.9677	antitoxin endoai
12	WP_003180123.1	Bacillus	1	9e-61	1	hypothetical protein
		Bacillus swezeyi	1	1e-57	0.9271	anti-sigma factor
		Bacillus glycinifermentans	1	2e-57	0.9167	hypothetical protein
		Bacillus sp. WMMC1349	1	8e-57	0.9062	anti-sigma factor
13	WP_025810847.1	Bacillus	1	0	1	hypothetical protein
		Bacillus sp. MBGLi97	1	0	0.9966	Virginiamycin B lyase
		Bacillus sp. CPSM8	1	0	0.9932	Virginiamycin B lyase
		Bacillus subtilis group	1	0	0.9898	hypothetical protein
		Bacillus sp. SB47	1	0	0.9864	hypothetical protein
		Bacillus sp. MSP5.4	1	0	0.9864	Virginiamycin B lyase
		Bacillus licheniformis	0.99	0	0.9317	Virginiamycin B lyase
		Bacillus haynesii	0.99	0	0.9283	Virginiamycin B lyase
14	WP_020450411.1	Bacillus licheniformis	1	3e-84	1	hypothetical protein
		Bacillus	1	4e-84	1	hypothetical protein
		Bacillus haynesii	1	4e-83	0.9841	hypothetical protein
		Bacillus licheniformis DSM 13 = ATCC 14580	1	5e-83	0.9841	YdjM
		Bacillus glycinifermentans	1	1e-78	0.9365	hypothetical protein
		Bacillus swezeyi	1	2e-78	0.9286	RlpA-like double-psi beta-barrel domain-containing protein
15	WP_105980832.1	Bacillus subtilis group	1	6e-150	0.9952	hypothetical protein
		Bacillus	1	2e-149	0.9952	hypothetical protein
		Bacillus sp. B19-2	1	3e-142	0.9426	hypothetical protein
		Bacillus sp. J41TS8	1	7e-141	0.9378	hypothetical protein
		Bacillus licheniformis	1	2e-138	0.9282	hypothetical protein
		Bacillus haynesii	1	3e-137	0.9187	hypothetical protein
16	WP_009328837.1	Bacillus	1	6e-132	1	hypothetical protein
		Bacillus licheniformis	0.36	5e-39	1	hypothetical protein
		Bacillus haynesii	1	3e-131	0.9946	hypothetical protein
17	WP_003180732.1	Bacillus	1	2e-108	1	hypothetical protein
		Bacillus sp. B19-2	1	1e-101	0.947	helix-hairpin-helix domain-containing protein
		Bacillus haynesii	1	1e-97	0.9073	helix-hairpin-helix domain-containing protein
		Bacillus licheniformis	1	5e-96	0.9073	Pathogenicity locus
18	WP_199792123.1	Bacillus	1	0	0.9884	hypothetical protein
		Bacillus sp. MBGLi97	1	0	0.9861	hypothetical protein
		Bacillus subtilis group	1	0	0.9826	hypothetical protein
		Bacillus sp. B19-2	1	0	0.956	hypothetical protein
		Bacillus haynesii	0.99	0	0.9269	hypothetical protein
		Bacillus licheniformis	0.99	0	0.9234	hypothetical protein
		Bacillus licheniformis CG-B52	1	0	0.9143	hypothetical protein
19	WP_020451108.1	Bacillus	1	5e-66	1	hypothetical protein
		Bacillus sp. B19-2	1	2e-65	0.9904	DUF5082 domain-containing protein
		Bacillus subtilis group	1	1e-64	0.9808	hypothetical protein
		Bacillus haynesii	1	8e-64	0.9712	hypothetical protein
		Bacillus licheniformis	0.99	2e-60	0.9417	DUF5082 domain-containing protein
20	WP_020451191.1	Bacillus	1	4e-94	1	YkyB family protein
		Bacillus licheniformis DSM 13 = ATCC 14580	1	1e-93	0.9935	YkyB family protein
		Bacillus licheniformis	0.87	1e-78	0.9925	YkyB family protein
		Bacillus haynesii	1	5e-93	0.9869	YkyB family protein
		Bacillus swezeyi	1	1e-91	0.9412	YkyB family protein
		Bacillus glycinifermentans	1	1e-87	0.9281	YkyB family protein
21	WP_026579751.1	Bacillus	1	3e-84	1	hypothetical protein
		Bacillus haynesii	1	2e-81	0.9669	hypothetical protein
		Bacillus licheniformis	1	3e-81	0.9669	hypothetical protein
		Bacillus licheniformis DSM 13 = ATCC 14580	1	6e-79	0.9421	YlyA
22	WP_105980957.1	Bacillus	1	6e-130	0.9951	hypothetical protein
		Bacillus sp. MBGLi79	0.97	5e-126	0.995	hypothetical protein
		Bacillus sp. B19-2	1	1e-127	0.9707	hypothetical protein
		Bacillus haynesii	1	7e-126	0.9561	hypothetical protein
		Bacillus licheniformis WX-02	1	1e-125	0.9561	YmaB (putative cofactor involved in deoxyribonucleotide synthesis)
		Bacillus swezeyi	1	4e-117	0.9024	hypothetical protein
23	WP_023857538.1	Bacillus	1	4e-56	1	hypothetical protein
		Bacillus sp. 7705b	1	2e-53	0.9615	hypothetical protein
		Bacillus subtilis group	1	8e-53	0.9615	hypothetical protein
		Bacillus mojavensis	1	2e-53	0.9519	hypothetical protein
		Bacillus spizizenii	1	2e-53	0.9519	hypothetical protein
		Bacillus sp. AF23	1	6e-53	0.9519	YfzA family protein
		Bacillus halotolerans	1	7e-53	0.9519	hypothetical protein
		Bacillus badius	0.78	6e-36	0.9512	YfzA family protein
		Bacillus tequilensis	1	3e-53	0.9423	hypothetical protein
		Bacillus rugosus	1	4e-52	0.9423	YfzA family protein
		Bacillus licheniformis	1	2e-51	0.9423	hypothetical protein
24	WP_020451915.1	Bacillus	1	7e-88	1	hypothetical protein
		Bacillus sp. B19-2	1	4e-87	0.9784	Hsp20/alpha crystallin family protein
		Bacillus licheniformis	1	4e-86	0.9712	Hsp20/alpha crystallin family protein
		Bacillus haynesii	1	6e-86	0.9712	Hsp20/alpha crystallin family protein
25	WP_020452052.1	Bacillus	1	1e-72	1	hypothetical protein
		Bacillus sp. B19-2	1	5e-72	0.9907	hypothetical protein
		Bacillus licheniformis	1	8e-72	0.9813	hypothetical protein
26	WP_026579290.1	Bacillus	0.9	1e-89	1	hypothetical protein
		Bacillus sp. B19-2	0.9	2e-84	0.9436	YqfQ family protein
		Bacillus licheniformis	0.9	6e-81	0.9179	hypothetical protein
		Bacillus haynesii	0.9	1e-80	0.9128	YqfQ family protein
27	WP_020452371.1	Bacillus	1	0	1	hypothetical protein
		Bacillus subtilis group	1	0	0.9968	hypothetical protein
		Bacillus sp. B19-2	1	0	0.9809	cupin
		Bacillus licheniformis	1	0	0.9777	cupin
		Bacillus haynesii	1	0	0.9777	cupin
28	WP_234026546.1	Bacillus	1	2e-126	0.9948	hypothetical protein
		Bacillus sp. AIIW2	0.81	2e-97	0.9806	hypothetical protein
		Bacillus licheniformis	0.92	2e-55	0.9368	hypothetical protein
		Bacillus sp. SB47	1	1e-123	0.9317	hypothetical protein
		Bacillus licheniformis LMG 7559	0.91	2e-102	0.9029	hypothetical protein
29	WP_023855527.1	Bacillus	1	0	1	hypothetical protein
		Bacillus subtilis group	0.95	0	0.9944	transcriptional regulator
		Bacillus amyloliquefaciens	0.93	0	0.9942	histidine kinase
		Bacillus sp. SB47	1	0	0.9919	hypothetical protein
		Bacillus haynesii	0.92	0	0.971	hypothetical protein
		Bacillus licheniformis	0.69	0	0.9692	hypothetical protein
		Bacillus licheniformis DSM 13 = ATCC 14580	0.8	0	0.9601	response regulator aspartate phosphatase
30	WP_105981186.1	Bacillus subtilis group	1	1e-120	0.9649	hypothetical protein
		Bacillus licheniformis	1	1e-120	0.9649	hypothetical protein
		Bacillus glycinifermentans	1	2e-120	0.9649	hypothetical protein
		Bacillus	1	3e-120	0.9649	hypothetical protein
		Bacillus sonorensis	1	1e-119	0.9591	hypothetical protein
		Bacillus sp. GbtcB13	1	5e-119	0.9474	hypothetical protein
		Bacillus haynesii	1	6e-118	0.9425	hypothetical protein
31	WP_105981199.1	Bacillus	0.97	0	0.9958	hypothetical protein
		Bacillus subtilis group	0.97	0	0.9915	hypothetical protein
		Bacillus sp.	0.97	0	0.9894	hypothetical protein
		Bacillus licheniformis	0.97	0	0.9683	hypothetical protein
		Bacillus sp. B19-2	0.97	0	0.9662	hypothetical protein
		Bacillus haynesii	0.97	0	0.9619	hypothetical protein
32	WP_003185659.1	Bacillus	1	2e-79	1	hypothetical protein
		Bacillus licheniformis	0.92	5e-72	1	motility-swarming
		Bacillus amyloliquefaciens	0.69	9e-52	1	Swarming motility protein SwrAA
		Bacillus licheniformis DSM 13 = ATCC 14580	0.94	3e-74	0.991	Swarming motility protein SwrAA
		Bacillus sonorensis L12	0.94	1e-73	0.982	Swarming motility protein SwrAA
		Bacillus glycinifermentans	1	1e-77	0.9744	hypothetical protein
		Bacillus sp. WMMC1349	1	2e-75	0.9487	Swarming motility protein SwrAA
33	WP_023857076.1	Bacillus	1	6e-103	1	hypothetical protein
		Bacillus amyloliquefaciens	0.89	4e-90	1	hypothetical protein
		Bacillus sp. B19-2	1	2e-100	0.9728	hypothetical protein
		Bacillus licheniformis	0.91	2e-90	0.9704	hypothetical protein
		Bacillus licheniformis WX-02	1	3e-99	0.966	general stress acyl-CoA N-acyltransferase YwlB
		Bacillus haynesii	1	2e-99	0.9592	hypothetical protein
34	WP_023856950.1	Bacillus	1	3e-112	1	hypothetical protein
		Bacillus licheniformis	1	3e-109	0.9618	hypothetical protein
		Bacillus haynesii	1	5e-109	0.9618	hypothetical protein
		Bacillus swezeyi	1	7e-105	0.9172	hypothetical protein
		Bacillus sonorensis	1	8e-101	0.9045	hypothetical protein
35	WP_026580354.1	Bacillus	1	8e-81	0.9915	YxiJ-like family protein
		Bacillus licheniformis	1	2e-77	0.9402	Immunity protein WapI
		Bacillus haynesii	1	2e-75	0.9145	hypothetical protein
36	WP_023856884.1	Bacillus	1	0	1	hypothetical protein
		Bacillus sp. MBGLi79	1	0	0.9972	lipoprotein YdaJ
		Bacillus sp. B19-2	1	0	0.975	lipoprotein YdaJ
		Bacillus licheniformis	1	0	0.9611	lipoprotein YdaJ
		Bacillus haynesii	1	0	0.9583	lipoprotein YdaJ
		Bacillus sp. Gen2	0.98	0	0.9292	lipoprotein YdaJ
37	WP_020453535.1	Bacillus	1	2e-126	1	hypothetical protein
		Bacillus licheniformis	0.93	1e-114	0.983	hypothetical protein
		Bacillus haynesii	1	1e-121	0.9681	hypothetical protein
