# Supplementary material for: Functional Annotation Of Hypothetical Proteins From The Bacillus Paralicheniformis Strain Bac84 Reveals Proteins with Biotechnological Potentials – an In Silico Approach
Source: Research Square preprint supplement (doi:10.21203/rs.3.rs-1862992/v1), 2022-07-18
Supplement: Supplementary file 5 [file 8049c5352da4e391bd4b9ef8.xlsx]

## Sheet: Final table
	Supplementary Table S10 : Tertiary structural information of HPs from B. Paralichenformis strain Bac84.
	No.	HP ID	Templates	Domain and function	Organism	% Identity	Method	Resolution	Coverage	Oligo-State	GMQE	QMEAN	Ramachandran Favoured
	1	WP_158700706.1	1fwg.1.C	Urease	Klebsiella aerogenes	0.4324	X-ray	2.00 Å	0.82	Monomer	0.61	-0.12	0.9429
	2	WP_095290960.1	4g8x.1.A	RNA polymerase sigma factor rpoD	Staphyloccus aureus	0.2927	X-ray	3.00 Å	0.68	Monomer	0.3	-1.55	0.8974
	3	WP_224146215.1	4gyo.1.A	Response regulator aspartate phosphatase	not given	0.4394	X-ray	2.16 Å	0.96	Monomer	0.72	-1.07	0.9375
	4	WP_006638778.1	4me7.1.E	Antitoxin EndoAI	Bacillus subtilis	0.7174	X-ray	2.92 Å	0.99	Monomer	0.71	-0.85	0.9737
	5	WP_009328837.1	3qjg.1.A	Epidermin biosynthesis protein EpiD	Staphylococcus aureus	0.3382	X-ray	2.04 Å	0.74	Homo-12-mer	0.55	-2.74	0.9308
	6	WP_026579751.1	6ptg.1.A	transcriptional regulator Dks	Chlamydia trachomatis	0.3721	X-ray	2.95 Å	0.71	Monomer	0.28	-1.62	0.9529
	7	WP_105980957.1	3e57.1.A	a putative Nudix hydrolase	not given	0.3141	X-ray	1.89 Å	0.93	Homo-dimer	0.65	-3.66	0.9442
	8	WP_023855527.1	4gyo.1.A	Response regulator aspartate phosphatase	not given	0.3167	X-ray	2.16 Å	0.97	Homo-dime	0.77	-0.56	0.9677
	9	WP_105981199.1	6wpx.1.A	lipase BlEst2	Bacillus licheniformis	0.9588	X-ray	2.00 Å	1	Monomer	0.93	-0.68	0.9712
	10	WP_023856950.1	5mkd.2.A	Ywea	Bacillus subtilis	0.5372	X-ray	2.51 Å	0.77	Monomer	0.61	-2.56	0.916
	11	WP_023856884.1	6r2m.2.A	Glycoside transferase	Listeria monocytogenes	0.3224	X-ray	1.62 Å	0.68	Monomer	0.47	-3.19	0.9297
