# Supplementary material for: Functional Annotation Of Hypothetical Proteins From The Bacillus Paralicheniformis Strain Bac84 Reveals Proteins with Biotechnological Potentials – an In Silico Approach
Source: Research Square preprint supplement (doi:10.21203/rs.3.rs-1862992/v1), 2022-07-18
Supplement: Supplementary file 7 [file ad0e26eeab96006fdbc1e9c3.xlsx]

## Sheet: scoreROC
	Supplementary Table S10 : Dataset of functional annotation for 100 functionally known proteins from Bacillus paralicheniformis strain Bac84 using the same pipeline used for the HP prediction.
			Pfam			InterPro		CATH		SUPERFAMILY		ScanProsite		SMART		CDD-Blast
No	Protein ID	Protein Name	Prediction	Score	Column1	Prediction2	Score2	Prediction3	Score4	Prediction4	Score3	Prediction5	Score5	prediction6	Score6	Column7	Score7
1	WP_020453630.1	GntR family transcriptional regulator	Bacterial regulatory proteins, gntR family	1(5)		Transcription regulator HTH, GntR	1(5)	GntR family transcriptional regulator	1(5)	GntR-like transcriptional regulators	1(5)	GntR-type HTH domain	1(5)	helix_turn_helix gluconate operon transcriptional repressor	1(5)	DNA-binding transcriptional regulator, GntR family	1(5)
2	WP_105980614.1	N-acetylmuramic acid 6-phosphate etherase	SIS (Sugar ISomerase) domain	1(3)		N-acetylmuramic acid 6-phosphate etherase/glucokinase regulatory protein	1(5)	HTH-type transcriptional repressor YvoA / GntR family transcriptional regulator	1(5)	SIS (Sugar ISomerase) domain	1(3)	SIS domain	1(3)	No Results	0 (2)	N-acetylmuramic acid-6-phosphate etherase	1(5)
3	WP_020453634.1	DHH family phosphoesterase	DHH phosphatase family	1(5)		DHH phosphoesterase superfamily	1(5)	Cyclic-di-AMP phosphodiesterase	1(4)	DHH phosphoesterases	1(5)	GGDEF domain	1(2)	GGDEF domain	1(4)	c-di-AMP phosphodiesterase, consists of a GGDEF-like and DHH domains	1(3)
4	WP_020453645.1	spore protease YyaC	Protein of unknown function (DUF1256)/Germination protease	1(2)		Unknown function DUF1256/Peptidase HybD-like domain superfamily	0 (2)	No results	0 (2)	Hydrogenase maturating endopeptidase HybD/Germination protease	1(2)	No results	0 (2)	Sporulation protein YyaC	1(5)	putative sporulation protein YyaC	1(5)
5	WP_023856805.1	spore coat protein	Coat F domain	1(5)		Spore coat protein CotF-like	1(5)	Spore coat protein F	1(5)	No results	0(2)	No results	0 (2)	Spore coat protein F	1(5)	Spore coat protein CotF	1(5)
6	WP_003178024.1	single-stranded DNA-binding protein SsbA	Single-strand binding protein family	1(5)		Primosome PriB/single-strand DNA-binding	1(5)	Nucleic acid-binding proteins	1(5)	Nucleic acid-binding proteins	1(4)	Single-strand binding protein family	1(5)	Single-stranded DNA-binding protein	1(5)	the OB fold of ssDNA-binding protein	1(5)
7	WP_023856802.1	GerAB/ArcD/ProY family transporter	Spore germination protein (Spore_permease)	1(5)		Spore germination GerAB	1(5)	No results	0 (2)	No results	0 (2)	No results	0 (2)	No results	0 (2)	SLC5/6 (solute carrier 5/6) family protein may function as a transporter	1 (2)
8	WP_020453647.1	sporulation initiation inhibitor protein Soj	AAA domains- ATPases Associated with various cellular Activities	1 (2)		P-loop containing nucleoside triphosphate hydrolase	0 (2)	Sporulation initiation inhibitor Soj	1(5)	P-loop containing nucleotide triphosphate hydrolases	0 (2)	No results	0 (2)	Sporulation initiation inhibitor protein Soj	1(5)	AAA domains- ATPases Associated with various cellular Activities	1 (2)
9	WP_023856800.1	carboxymuconolactone decarboxylase family protein	Carboxymuconolactone decarboxylase family	1(5)		α-helical domain found in alkyl-hydroperoxide reductase AhpD includes Carboxymuconolactone decarboxylase-like	1(4)	α-helical domain found in alkyl-hydroperoxide reductase AhpD includes Carboxymuconolactone decarboxylase-like	1(4)	α-helical domain found in alkyl-hydroperoxide reductase AhpD includes Carboxymuconolactone decarboxylase-like	1(3)	No results	0 (2)	Alkyl hydroperoxide reductase AhpD	1(4)	Carboxymuconolactone decarboxylase family	1(5)
10	WP_020453649.1	RNA polymerase sigma-70 factor	Region 2 of sigma-70	1(4)		RNA polymerase sigma-70, ECF type	1(5)	ECF RNA polymerase sigma factor SigJ	1(4)	Sigma2 domain of RNA polymerase sigma factors	1(5)	No results	0 (2)	RNA polymerase sigma-70 factor ECF subfamily	1(5)	RNA polymerase sigma-70 factor	1(5)
11	WP_003178089.1	DNA replication/repair protein RecF	RecF/RecN/SMC N terminal domain	1(4)		RecF is required for recombinational DNA repair and for induction of the SOS response	1(5)	RecF/RecN/SMC N terminal domain	1(4)	P-loop containing nucleotide triphosphate hydrolases	0 (3)	RecF protein signature 1	1(5)	DNA replication and repair protein RecF	1(5)	ATP-binding cassette domain of RecF	1(5)
12	WP_026580417.1	DNA polymerase III subunit beta	DNA polymerase III beta subunit, N-terminal domain	1(5)		DNA polymerase III, beta sliding clamp	1(5)	DNA Polymerase III, subunit A, domain 2	1(5)	DNA polymerase III, beta subunit	1(5)	No results	0 (2)	DNA polymerase III beta subunit	1(5)	DNA polymerase III subunit beta	1(5)
13	WP_031305110.1	DNA topoisomerase (ATP-hydrolyzing) subunit B	DNA gyrase B	1(5)		DNA topoisomerase, type IIA, subunit B	1(5)	DNA gyrase B	1(5)	Type II DNA topoisomerase	1(5)	DNA topoisomerase II	1(4)	DNA topoisomerase II, GyrB, ParE	1(5)	DNA gyrase subunit B	1(5)
14	WP_023856793.1	DNA gyrase subunit A	DNA gyrase subunit A	1(5)		DNA gyrase/topoisomerase IV, subunit A	1(5)	DNA gyrase subunit A	1(5)	Type II DNA topoisomerase	1(5)	No results	0 (2)	Bacterial DNA topoisomerase IV, GyrA, ParC	1(4)	DNA gyrase subunit A	1(5)
15	WP_229128912.1	cysteine hydrolase	Isochorismatase family	1(4)		Isochorismatase-like superfamily (a superfamily of hydrolase enzymes)	1(4)	Isochorismatase hydrolase	1(4)	Isochorismatase-like hydrolases	1(4)	No results	0 (2)	No results	0 (2)	cysteine_hydrolases	1(5)
16	WP_025810903.1	tRNA adenosine(34) deaminase TadA	MafB19-like deaminase	1(4)		tRNA-specific adenosine deaminase	1(5)	tRNA-specific adenosine deaminase	1(5)	Deoxycytidylate deaminase-lik	1(4)	Cytidine and deoxycytidylate deaminases domain	1(4)	No results	0 (2)	tRNA(Arg) A34 adenosine deaminase TadA	1(5)
17	WP_020449786.1	recombination protein RecR	RecR protein	1(5)		DNA recombination protein RecR	1(5)	Recombination protein RecR	1(5)	Recombination protein RecR	1(5)	RecR protein	1(5)	topoisomerases, DnaG-type primases, OLD family nucleases and RecR proteins	1(5)	RecR protein	1(5)
18	WP_026579002.1	methionine--tRNA ligase	tRNA synthetases class I	1(5)		Methionine-tRNA synthetase, type 2	1(5)	Methionine--tRNA ligase	1(5)	Class I aminoacyl-tRNA synthetases (RS), catalytic domain	1(5)	tRNA-binding domain	1(3)	methionine--tRNA ligase	1(5)	methionyl-tRNA synthetase	1(5)
19	WP_026579001.1	TatD family hydrolase	TatD related Dnase	1(4)		hydrolase TatD-type	1(5)	TatD family hydrolase	1(5)	TatD Mg-dependent DNase-like	1(5)	TatD deoxyribonuclease family	1(4)	TatD family deoxyribonuclease	1(5)	Tat protein secretion system quality control protein TatD (DNase activity	1(5)
20	WP_020449795.1	DNA replication initiation control protein YabA	Initiation control protein YabA	1(5)		Initiation control protein YabA	1(5)	Vasodilator-stimulated phosphoprotein	0 (2)	Myosin rod fragments	0 (2)	No results	0 (2)	Initiation-control protein YabA	1(5)	DNA replication initiation control protein YabA	1(5)
21	WP_023855980.1	sporulation peptidase YabG	YabG peptidase U57	1(5)		Peptidase U57, YabG	1(5)	No results	0 (2)	Adenine nucleotide alpha hydrolases-like	0 (2)	No results	0 (2)	No results	0 (2)	sporulation peptidase YabG	1(5)
22	WP_020449806.1	pur operon repressor	Bacterial purine repressor, N-terminal	1(5)		Pur operon repressor	1(5)	Pur operon repressor	1(5)	Phosphoribosyltransferases (PRTases)	0 (2)	No results	0 (2)	Purine operon repressor PurR	1(5)	Pur operon repressor	1(5)
23	WP_025809571.1	transcription-repair coupling factor	CarD-like/TRCF domain	1(5)		Transcription-repair coupling factor	1(5)	Transcription-repair coupling factor	1(5)	TRCF domain	1(5)	Superfamilies 1 and 2 helicase domain	1(4)	the transcription-repair-coupling factor (TRCF)	1(5)	Transcription-repair coupling factor (superfamily II helicase)	1(5)
24	WP_020449813.1	stage V sporulation protein T	Stage V sporulation protein T	1(5)		Sporulation stage V, protein T	1(5)	Sporulation stage V, protein T	1(5)	AbrB N-terminal domain-like	1(3)	SpoVT-AbrB domain	1(5)	SpoVT / AbrB like domain	1(5)	stage V sporulation protein T	1(5)
25	WP_105980624.1	polysaccharide biosynthesis protein	polysaccharide biosynthesis protein	1(5)		polysaccharide biosynthesis protein	1(5)	No results	0 (2)	No results	0 (2)	No results	0 (2)	No results	0 (2)	Stage V sporulation protein B, also known as Stage III sporulation protein F, and related proteins	1 (2)
26	WP_020449821.1	serine/threonine-protein kinase	Protein kinase domain	1(5)		Protein kinase domain	1(5)	Probable serine/threonine-protein kinase YabT	1(5)	Protein kinases, catalytic subunit	1(5)	Protein kinase domain	1(5)	Serine/threonine protein kinase	1(5)	Serine/threonine protein kinase	1(5)
27	WP_023855974.1	tRNA lysidine(34) synthetase TilS	tRNA(Ile)-lysidine synthase	1(5)		tRNA(Ile)-lysidine synthase	1(5)	tRNA(Ile)-lysidine synthase	1(5)	tRNA(Ile)-lysidine synthase	1(5)	No results	0 (2)	the tRNA(Ile) lysidine synthetase (TilS) protein.	1(5)	tRNA(Ile)-lysidine synthase	1(5)
28	WP_003178236.1	hypoxanthine phosphoribosyltransferase	Phosphoribosyl transferase domain	1(5)		hypoxanthine phosphoribosyltransferase	1(5)	hypoxanthine phosphoribosyltransferase	1(5)	Phosphoribosyl transferase domain	1(5)	Purine/pyrimidine phosphoribosyl transferases	1(4)	Hypoxanthine phosphoribosyltransferase	1(5)	Hypoxanthine-guanine phosphoribosyltransferase	1(5)
29	WP_020449823.1	ATP-dependent zinc metalloprotease FtsH	Peptidase, FtsH	1(5)		Peptidase, FtsH	1(5)	ATP-dependent zinc metalloprotease FtsH	1(5)	ATP-dependent zinc metalloprotease FtsH	1(5)	ATPases associated with a variety of cellular activities	1(4)	ATPases associated with a variety of cellular activities	1(4)	ATP-dependent zinc metalloprotease FtsH	1(5)
30	WP_003178242.1	type III pantothenate kinase	type III pantothenate kinase	1(5)		type III pantothenate kinase	1(5)	type III pantothenate kinase	1(5)	Actin-like ATPase domain	1(4)	No results	0 (2)	Type III pantothenate kinase	1(5)	type III pantothenate kinase	1(5)
31	WP_020449824.1	Hsp33 family molecular chaperone HslO	Hsp33 protein	1(5)		Heat shock protein Hsp33	1(5)	33 kDa chaperonin	1(5)	Hsp33 domain	1(5)	No results	0 (2)	33 kDa chaperonin	1(5)	Hsp33 family molecular chaperone	1(5)
32	WP_026578991.1	peptidyl-prolyl cis-trans isomerase	PPIC-type PPIASE domain	1(5)		Peptidyl-prolyl cis-trans isomerase, PpiC-type	1(5)	Peptidylprolyl isomerase	1(5)	Porin chaperone SurA, peptide-binding domain	1(4)	PpiC-type peptidyl-prolyl cis-trans isomerase family	1(5)	No results	0 (2)	peptidylprolyl isomerase	1(5)
33	WP_020449826.1	cysteine synthase A	Pyridoxal-phosphate dependent enzyme	1(3)		Cysteine synthase	1(5)	Cysteine synthase	1(5)	Tryptophan synthase beta subunit-like PLP-dependent enzymes	1(4)	Cysteine synthase/cystathionine beta-synthase P-phosphate attachment site	1(4)	Cysteine synthase	1(5)	Tryptophan synthase beta superfamily (fold type II)	1(4)
34	WP_020449916.1	MurR/RpiR family transcriptional regulator	Helix-turn-helix domain, rpiR family	1(4)		Homeobox-like domain superfamily	1(4)	RpiR family transcriptional regulator	1(5)	mono-SIS domain/RpiR-like	1(4)	RpiR-type HTH domain	1(4)	RpiR family transcriptional regulator	1(5)	DNA-binding transcriptional regulator, MurR/RpiR family, contains HTH and SIS domains	1(5)
35	WP_035337445.1	ABC transporter ATP-binding protein	ABC transporter	1(5)		ABC_transporter-like_ATP-bd	1(5)	ABC transporter ATP-binding protein	1(5)	ABC transporter ATPase domain-like	1(5)	ATP-binding cassette, ABC transporter-type domain	1(5)	ATPases associated with a variety of cellular activities	1(4)	ABC-type multidrug transport system, ATPase component	1(5)
36	WP_023857690.1	GntR family transcriptional regulator	Bacterial regulatory proteins, gntR family	1(5)		Transcription regulator HTH, GntR	1(5)	GntR family transcriptional regulator	1(5)	GntR-like transcriptional regulators	1(5)	GntR-type HTH domain	1(5)	helix_turn_helix gluconate operon transcriptional repressor	1(5)	DNA-binding transcriptional regulator YhcF, GntR family	1(5)
37	WP_171866289.1	sensor histidine kinase	Histidine kinase-, DNA gyrase B-, and HSP90-like ATPase	1(5)		Histidine kinase/HSP90-like ATPase superfamily	1(5)	Hybrid sensor histidine kinase/response regulator	1(5)	Histidine kinase	1(5)	Histidine kinase domain	1(5)	histidine kinase	1(5)	Histidine kinase-like ATPases; Histidine kinase-, DNA gyrase B-, phytochrome-like ATPases	1(5)
38	WP_003178602.1	FadR family transcriptional regulator	Bacterial regulatory proteins, gntR family	1(5)		Transcription regulator FadR/GntR, C-terminal	1(5)	GntR family transcriptional regulator	1(5)	GntR-like transcriptional regulators	1(5)	GntR-type HTH domain	1(5)	ntR family transcriptional regulator	1(4)	DNA-binding transcriptional regulator, FadR family	1(5)
39	WP_025810829.1	galactarate dehydratase	D-galactarate dehydratase / Altronate hydrolase, C terminus	1(5)		Galactarate dehydratase GarD-like	1(5)	Galactarate dehydratase	1(5)	Ava3019-like Superfamily	0 (3)	No results	0 (2)	SAF domain (antifreeze proteins and flagellar FlgA proteins, and CpaB pilus proteins).	1 (3)	galactarate dehydratase	1(5)
40	WP_020450025.1	lantibiotic immunity ABC transporter MutE/EpiE family permease subunit	ABC-2 family transporter protein	1(5)		Lantibiotic ABC transporter permease subunit, SpaE/MutE	1(5)	No results	0 (2)	No results	0 (2)	No results	0 (2)	Lantibiotic protection ABC transporter permease MutE	1(5)	lantibiotic protection ABC transporter permease subunit, MutE/EpiE family	1(5)
41	WP_105980681.1	lantibiotic immunity ABC transporter MutG family permease subunit	ABC-2 family transporter protein	1(5)		Lantibiotic ABC transporter permease subunit, SpaE/MutE	1(4)	No results	0 (2)	No results	0 (2)	No results	0 (2)	Lantibiotic protection ABC transporter permease MutE	1(4)	lantibiotic protection ABC transporter permease subunit, MutE/EpiE family	1(5)
42	WP_020450027.1	response regulator transcription factor	Response regulator receiver domain	1(5)		Transcriptional regulatory protein WalR-like	1(5)	response regulator transcription factor	1(5)	C-terminal effector domain of the bipartite response regulators	1(4)	Response regulatory domain	1(5)	the response regulator receiver domain	1(5)	DNA-binding response regulator, OmpR family, contains REC and winged-helix (wHTH) domain	1(5)
43	WP_020450069.1	toxic anion resistance protein	Toxic anion resistance protein (TelA)	1(5)		Toxic anion resistance	1(5)	No results	0 (2)	Bacterial hemolysins	0 (2)	No results	0 (2)	No results	0 (2)	Toxic anion resistance protein (TelA)	1(5)
44	WP_020450077.1	ammonia-dependent NAD(+) synthetase	NAD_synthase	1(5)		NAD(+) synthetase	1(5)	NH(3)-dependent NAD(+) synthetase	1(5)	N-type ATP pyrophosphatases	1(4)	No results	0 (2)	NH(3)-dependent NAD(+) synthetase	1(5)	ammonia-dependent NAD(+) synthetase	1(5)
45	WP_059230719.1	shikimate kinase	Shikimate kinase	1(5)		Shikimate kinase/gluconokinase	1(5)	Shikimate kinase	1(5)	Shikimate kinase	1(5)	Shikimate kinase	1(5)	No results	0 (2)	Shikimate kinase	1(5)
46	WP_049937190.1	permease	Predicted permease	1(5)		Predicted permease DUF318	1(5)	No results	0 (2)	No results	0 (2)	No results	0 (2)	No results	0 (2)	Uncharacterized membrane protein YraQ, UPF0718 family	1(4)
47	WP_035337279.1	acetylxylan esterase	Acetyl xylan esterase (AXE1)	1(5)		Carbohydrate esterase 7 family	1(4)	Acetyl xylan esterase	1(4)	Acetyl xylan esterase-like	1(5)	No results	0 (2)	No results	0 (2)	Acetyl xylan esterase (AXE1)	1(5)
48	WP_223254835.1	amino acid permease	Amino acid permease	1(5)	1(5)	Amoino_acid_permease_CS	1(5)	Amino acid permease	1(5)	No results	0 (2)	Amino acid permease	1(5)	No results	0 (2)	Amino acid permease	1(5)
49	WP_020450128.1	UbiX family flavin prenyltransferase	Flavoprotein	1(4)		Probable UbiX-like flavin prenyltransferase	1(5)	Flavin prenyltransferase UbiX	1(5)	Homo-oligomeric flavin-containing Cys decarboxylases, HFCD	1(4)	No results	0 (2)	Probable UbiX-like flavin prenyltransferase	1(5)	aromatic acid decarboxylase	1(4)
50	WP_023855656.1	UbiD family decarboxylase	3-octaprenyl-4-hydroxybenzoate carboxy-lyase	1(5)		UbiD decarboxylyase family	1(5)	3-octaprenyl-4-hydroxybenzoate carboxy-lyase	1(5)	UbiD middle domain-like	1(4)	No results	0 (2)	Phenolic acid decarboxylase subunit C	1(4)	UbiD family decarboxylase	1(5)
51	WP_026580536.1	spore germination protein	Bacillus/Clostridium GerA spore germination protein	1(5)		Bacillus/Clostridium Ger spore germination protein	1(5)	No results	0 (2)	No results	0 (2)	No results	0 (2)	No results	0 (2)	Bacillus/Clostridium GerA spore germination protein	1(5)
52	WP_020450178.1	antibiotic biosynthesis monooxygenase	Antibiotic biosynthesis monooxygenase	1(5)		Antibiotic biosynthesis monooxygenase domain	1(5)	Antibiotic biosynthesis monooxygenase	1(5)	Dimeric alpha+beta barrel	0 (3)	ABM domain	1(5)	No results	0 (2)	Quinol monooxygenase YgiN	1(5)
53	WP_020450223.1	carboxymuconolactone decarboxylase family protein	Carboxymuconolactone decarboxylase family	1(5)		AhpD-like/ Carboxymuconolactone decarboxylase-like	1(4)	No results	0 (2)	AhpD-like/ Carboxymuconolactone decarboxylase-like	1(4)	No results	0 (2)	No results	0 (2)	Alkylhydroperoxidase family enzyme, contains CxxC motif	0 (2)
54	WP_023855779.1	GTP cyclohydrolase FolE2	Type I GTP cyclohydrolase folE2	1(5)		GTP cyclohydrolase FolE2	1(5)	GTP cyclohydrolase MptA	1(5)	No results	0 (2)	No results	0 (2)	No results	0 (2)	GTP cyclohydrolase I FolE2;	1(5)
55	WP_039073293.1	class I SAM-dependent methyltransferase	Methyltransferase domain	1(5)		S-adenosyl-L-methionine-dependent methyltransferase superfamily	1(5)	Uncharacterized protein	0 (2)	S-adenosyl-L-methionine-dependent methyltransferase superfamily	1(5)	No results	0 (2)	No results	0 (2)	Methyltransferase domain	1(5)
56	WP_035337025.1	TetR/AcrR family transcriptional regulator	Bacterial regulatory proteins, tetR family	1(5)		DNA-binding HTH domain, TetR-type	1(4)	TetR family transcriptional regulator	1(5)	Tetracyclin repressor-like, N-terminal domain	1(5)	TetR-type HTH domain	1(4)	No results	0 (2)	DNA-binding transcriptional regulator, AcrR family	1(4)
57	WP_023855588.1	amidophosphoribosyltransferase	Glutamine amidotransferase domain	1(5)		amidophosphoribosyltransferase	1(5)	amidophosphoribosyltransferase	1(5)	Glutamine amidotransferase domain	1(5)	Glutamine amidotransferase type 2 domain	1(5)	No results	0 (2)	amidophosphoribosyltransferase	1(5)
58	WP_101561728.1	phosphoribosylformylglycinamidine cyclo-ligase	AIR synthase related protein	1(3)		phosphoribosylformylglycinamidine cyclo-ligase	1(5)	phosphoribosylformylglycinamidine cyclo-ligase	1(5)	PurM C-terminal domain-like	1(4)	No results	0 (2)	phosphoribosylformylglycinamidine cyclo-ligase	1(5)	phosphoribosylaminoimidazole synthetase	1(4)
59	WP_020450441.1	phosphoribosylglycinamide formyltransferase	Formyl transferase	1(5)		phosphoribosylglycinamide formyltransferase	1(5)	phosphoribosylglycinamide formyltransferase	1(5)	Formyl transferase	1(5)	phosphoribosylglycinamide formyltransferase	1(5)	Phosphoribosylglycinamide formyltransferase	1(5)	phosphoribosylglycinamide formyltransferase	1(5)
60	WP_023857834.1	MarR family transcriptional regulator	MarR family	1(5)		Transcriptional regulator MarR-type, conserved site	1(5)	MarR family transcriptional regulator	1(5)	MarR family transcriptional regulator	1(5)	MarR-type HTH domain	1(5)	helix_turn_helix multiple antibiotic resistance protein	1(4)	helix_turn_helix multiple antibiotic resistance protein;	1(5)
61	WP_035336980.1	ion transporter	Ion transport protein	1(5)		Ion transport domain	1(5)	Ion transport domain	1(5)	Voltage-gated potassium channels/Ion transport domain	1(4)	No results	0 (2)	ion transporter	1(5)	Ion transport domain	1(5)
62	WP_026578903.1	general stress protein	Heat induced stress protein YflT domain	1(4)		General stress protein 17M-like domain	1(5)	No results	0 (2)	No results	0 (2)	No results	0 (2)	No results	0 (2)	Heat induced stress protein YflT domain	1(4)
63	WP_020450572.1	calcium/proton exchanger	Sodium/calcium exchanger protein	1(5)		Calcium/proton exchanger	1(5)	Cation/H+ exchanger protein 2	1(5)	No results	0 (2)	No results	0 (2)	Calcium/proton antiporter	1(5)	Calcium/proton exchanger	1(5)
64	WP_020450621.1	recombination regulator RecX	RecX family	1(5)		Regulatory protein RecX	1(5)	Winged helix DNA-binding domain/Regulatory protein RecX	1(5)	No results	0 (2)	No results	0 (2)	Regulatory protein RecX	1(5)	Regulatory protein RecX	1(5)
65	WP_023855996.1	metal-dependent hydrolase	LexA-binding, inner membrane-associated putative hydrolase	1(5)		LexA-binding, inner membrane-associated putative hydrolase	1(5)	No results	0 (2)	LacY-like proton/sugar symporter	0 (2)	No results	0 (2)	No results	0 (2)	metal-dependent hydrolase	1(5)
66	WP_023856600.1	manganese catalase family protein	Manganese containing catalase	1(5)		Manganese catalase	1(5)	Catalase, Mn-containing	1(5)	Manganese catalase (T-catalase)	1(5)	No results	0 (2)	Polypeptide composition of the spore coat protein CotJC	1(4)	Manganese containing catalase	1(5)
67	WP_020450710.1	glycerol kinase GlpK	FGGY family of carbohydrate kinases	1(5)		Glycerol kinase	1(5)	Glycerol kinase	1(5)	Glycerol kinase	1(5)	FGGY family of carbohydrate kinases	1(5)	Glycerol kinase	1(5)	Glycerol kinase	1(5)
68	WP_023856512.1	nitric oxide-sensing transcriptional repressor NsrR	Iron-dependent Transcriptional regulator	1(4)		Transcription regulator Rrf2	1(4)	HTH-type transcriptional regulator NsrR	1(5)	Transcription regulator Rrf2	1(4)	Rrf2-type HTH domain	1(4)	Nitrite-sensitive transcriptional repressor NsrR	1(5)	Rrf2 family protein	1(4)
69	WP_025811804.1	citrate synthase/methylcitrate synthase	Citrate synthase	1(5)		Citrate synthase	1(5)	Citrate synthase	1(5)	Citrate synthase	1(5)	Citrate synthase	1(5)	Citrate synthase	1(5)	Citrate synthase	1(5)
70	WP_025811803.1	PQQ-dependent sugar dehydrogenase	Glucose/Sorbosone dehydrogenase	1(5)		Glucose/Sorbosone dehydrogenase	1(5)	Glucose/Sorbosone dehydrogenase	1(5)	Soluble quinoprotein glucose dehydrogenase	1(5)	Prokaryotic membrane lipoprotein lipid attachment site	0 (2)	glucose dehydrogenase	1(4)	Glucose/Sorbosone dehydrogenase	1(5)
71	WP_020450727.1	SDR family oxidoreductase	Enoyl-(Acyl carrier protein) reductase	1(4)		Short-chain dehydrogenase/reductase SDR	1(5)	SDR family oxidoreductase	1(5)	Tyrosine-dependent oxidoreductases	1(4)	Short-chain dehydrogenase/reductase SDR	1(5)	Putative NAD(P)-dependent dehydrogenase YhdF	1(4)	NADB_Rossmann super family	1(4)
72	WP_023856529.1	mechanosensitive ion channel	Mechanosensitive ion channel MscS	1(5)		Mechanosensitive ion channel MscS	1(5)	Mechanosensitive ion channel MscS	1(5)	Mechanosensitive ion channel MscS	1(5)	No results	0 (2)	No results	0 (2)	Mechanosensitive ion channel MscS	1(5)
73	WP_101560673.1	biotin transporter BioY	BioY family	1(5)		BioY protein	1(5)	Biotin transporter	1(5)	No results	0 (2)	No results	0 (2)	biotin transporter BioY	1(5)	Biotin transporter BioY	1(5)
74	WP_105980854.1	acetyl-CoA C-acyltransferase	Acetyl-Coenzyme A acetyltransferase	1(5)		Thiolase/Acetyl-CoA C-acyltransferase FadA	1(5)	Acetyl-Coenzyme A acetyltransferase (Thiolase)	1(5)	Acetyl-Coenzyme A acetyltransferase (Thiolase)	1(5)	Thiolases	1(5)	No results	0 (2)	Acetyl-Coenzyme A acetyltransferase	1(5)
75	WP_105980867.1	ammonium transporter	Ammonium transporter	1(5)		Ammonium transporter	1(5)	Ammonium transporter	1(5)	Ammonium transporter	1(5)	Ammonium transporter	1(5)	No results	0 (2)	Ammonia channel protein AmtB	1(5)
76	WP_105980870.1	aspartate aminotransferase family protein	Aminotransferase class-III	1(5)		Aminotransferase class-III	1(5)	Aminotransferase class-III	1(5)	PLP-dependent transferases	1(4)	Aminotransferase class-III	1(5)	No results	0 (2)	diaminobutyrate--2-oxoglutarate aminotransferase	1(5)
77	WP_105980871.1	methionine synthase	Homocysteine S-methyltransferase	1(4)		Cobalamin-dependent methionine synthase	1(5)	Methionine synthase	1(5)	Homocysteine S-methyltransferase/Methionine synthase SAM-binding domain	1(5)	Homocysteine-binding domain	1(4)	Cobalamin-dependent methionine synthase	1(5)	5-methyltetrahydrofolate--homocysteine methyltransferase	1(5)
78	WP_199792122.1	sensor histidine kinase	Histidine kinase-, DNA gyrase B-, and HSP90-like ATPase	1(4)		Signal transduction histidine kinase	1(5)	Sensor histidine kinase	1(5)	Sensor histidine kinase	1(5)	Histidine kinase domain	1(5)	Histidine kinase-like ATPases	1(5)	Sensor histidine kinase regulating citrate/malate metabolism	1(5)
79	WP_035399955.1	MULTISPECIES: lipase	Lipase	1(5)		Alpha/Beta hydrolase fold	1(4)	No results	0 (2)	Alpha/Beta hydrolase/ Hydrolase	1(5)	No results	0 (2)	lipase	1(5)	alpha/beta hydrolases; A functionally diverse superfamily containing proteases, lipases	1(5)
80	WP_105980888.1	ATP-binding protein	IstB-like ATP-binding protein	1(5)		IstB-like ATP-binding protein	1(5)	AAA family ATPase/DNA replication protein	1(4)	Extended AAA-ATPase domain	1(4)	No results	0 (2)	ATPases associated with a variety of cellular activities	1(4)	PRK06921 (hypothetical protein)	0 (2)
81	WP_105980897.1	sugar ABC transporter permease	Binding-protein-dependent transport system inner membrane component	1(4)		MetI-like superfamily	1(4)	Sugar ABC transporter, permease protein	1(5)	MetI-like	1(4)	ABC transporter integral membrane type-1 domain	1(5)	No results	0 (2)	ABC-type sugar transport system, permease component	1(5)
82	WP_035338894.1	ring-cleaving dioxygenase	Glyoxalase/Bleomycin resistance protein/Dioxygenase superfamily	1(4)		Glyoxalase/fosfomycin resistance/dioxygenase domain	1(4)	Glyoxalase family protein	1(4)	Glyoxalase/fosfomycin resistance/dioxygenase domain	1(4)	Vicinal oxygen chelate (VOC) domain	1(3)	Glyoxalase family protein	1(5)	C-terminal domain of Sphingobium chlorophenolicum 2,6-dichloro-p-hydroquinone 1,2-dioxygenase	1(5)
83	WP_035339418.1	trypsin-like peptidase domain-containing protein	Trypsin-like peptidase domain	1(5)		Peptidase S1C	1(5)	Periplasmic serine endoprotease DegP-like	1(4)	Trypsin-like serine proteases	1(4)	PDZ domains	0 (2)	PDZ domains	0 (2)	periplasmic serine protease, Do/DeqQ family	1(4)
84	WP_105980906.1	pectate lyase	Pectate lyase	1(5)		Pectin lyase family	1(5)	Pectate lyase A	1(5)	Pectin lyase-like	1(5)	No results	0 (2)	Pectate lyase	1(5)	Polysaccharide Lyase Family 6	1(5)
85	WP_025812022.1	glutamate 5-kinase	Amino acid kinase family	1(4)		Glutamate 5-kinase	1(5)	Glutamate 5-kinase	1(5)	Carbamate kinase-like	1(4)	Glutamate 5-kinase	1(5)	Glutamate 5-kinase	1(5)	gamma-glutamyl kinase	1(5)
86	WP_105980914.1	chemotaxis protein	CheW-like domain/Response regulator receiver domain	1(5)		Chemotaxis response regulator CheV	1(5)	Chemotaxis protein CheV	1(5)	CheW-like domain	1(5)	CheW-like domain/Response regulator receiver domain	1(5)	two-component signaling systems regulating bacterial chemotaxis	1(5)	CheW-like domain/Response regulator receiver domain	1(5)
87	WP_105981359.1	adenine deaminase	Adenine deaminase	1(5)		Adenine deaminase	1(5)	Adenine deaminase	1(5)	Adenine deaminase	1(5)	No results	0 (2)	No results	0 (2)	Adenine deaminase	1(5)
88	WP_035338761.1	proline--tRNA ligase	tRNA synthetase class II core domain	1(4)		Proline-tRNA ligase, class IIa	1(5)	Proline-tRNA ligase	1(5)	Class II aminoacyl-tRNA synthetase (aaRS)-like, catalytic domain	1(4)	Aminoacyl-transfer RNA synthetases class-II family	1(5)	proline--tRNA ligase	1(5)	prolyl-tRNA synthetase	1(5)
89	WP_105980935.1	flagellar biosynthesis protein FlhF	SRP54-type protein, GTPase domain	1(4)		flagellar biosynthesis protein FlhF	1(5)	flagellar biosynthesis protein FlhF	1(5)	P-loop containing nucleoside triphosphate hydrolases	0 (2)	No results	0 (2)	SRP54 domain	1 (3)	flagellar biosynthesis protein FlhF	1(5)
90	WP_096748457.1	thiamine diphosphokinase	Thiamin pyrophosphokinase, catalytic domain	1(5)		Thiamin pyrophosphokinase	1(5)	Thiamine pyrophosphokinase, putative	1(5)	Thiamin pyrophosphokinase, catalytic domain	1(5)	No results	0 (2)	thiamine diphosphokinase	1(5)	Thiamin pyrophosphokinase	1(5)
91	WP_026579749.1	dihydroorotase	Amidohydrolase family	1(4)		Dihydroorotase	1(5)	Dihydroorotase	1(5)	Metallo-dependent hydrolases	1(5)	Dihydroorotase	1(5)	No results	0 (2)	Dihydroorotase	1(5)
92	WP_095290421.1	N-acetyltransferase	Acetyltransferase (GNAT) family	1(5)		Putative N-acetyltransferase YlbP	1(5)	N-acetyltransferase YlbP	1(5)	N-acetyl transferase, NAT	1(5)	Gcn5-related N-acetyltransferase (GNAT) domain	1(5)	GNAT family N-acetyltransferase	1(5)	N-acetyltransferase	1(5)
93	WP_105980924.1	2-dehydropantoate 2-reductase	Ketopantoate reductase ApbA/PanE	1(4)		Ketopantoate reductase ApbA/PanE	1(4)	2-dehydropantoate 2-reductase	1(5)	Ketopantoate reductase PanE	1(4)	No results	0 (2)	No results	0 (2)	2-dehydropantoate 2-reductase	1(5)
94	WP_020451268.1	glutaminase A	Glutaminase	1(5)		Glutaminase	1(5)	Glutaminase	1(5)	Glutaminase	1(5)	No results	0 (2)	Glutaminase	1(5)	Glutaminase A	1(5)
95	WP_020451254.1	inositol monophosphatase family protein	Inositol monophosphatase family	1(5)		Inositol monophosphatase family	1(5)	Inositol monophosphatase family	1(5)	Inositol monophosphatase family	1(5)	Inositol monophosphatase family	1(5)	Inositol monophosphatase SuhB	1(5)	Inositol-monophosphatase-like domains	1(5)
96	WP_105980939.1	bifunctional riboflavin kinase/FAD synthetase	Riboflavin kinase	1(5)		Riboflavin kinase	1(5)	Riboflavin biosynthesis protein	1(5)	Riboflavin kinase	1(5)	No results	0 (2)	Riboflavin kinase	1(5)	bifunctional riboflavin kinase/FAD synthetase	1(5)
97	WP_105980955.1	serine hydrolase	Beta-lactamase	1(4)		Beta-lactamase-related/serine peptidases	1(4)	Serine beta-lactamase-like protein	1(4)	beta-lactamase/transpeptidase-like	1(4)	No results	0 (2)	No results	0 (2)	Beta-lactamase	1(4)
98	WP_105981024.1	nitroreductase family protein	Nitroreductase	1(5)		Nitroreductase	1(5)	Nitroreductase family protein	1(5)	FMN-dependent nitroreductase-like	1(5)	No results	0 (2)	No results	0 (2)	nitroreductase family protein similar to the NAD(P)H nitroreductase MhqN	1(5)
99	WP_105981025.1	lysine 2,3-aminomutase	Lysine-2,3-aminomutase	1(5)		Lysine-2,3-aminomutase	1(5)	Lysine-2,3-aminomutase	1(5)	MoCo biosynthesis proteins	0 (2)	MoCo biosynthesis proteins	0 (2)	Elongator protein 3, MiaB family, Radical SAM	0 (2)	Lysine-2,3-aminomutase	1(5)
100	WP_105981030.1	purine permease	Permease family	1(4)		Uric acid permease UacT-like	1(5)	No results	0 (2)	No results	0 (2)	Xanthine/uracil permeases family	1(4)	No results	0 (2)	xanthine permease	1(4)
