# Supplementary material for: Functional Annotation Of Hypothetical Proteins From The Bacillus Paralicheniformis Strain Bac84 Reveals Proteins with Biotechnological Potentials – an In Silico Approach
Source: Research Square preprint supplement (doi:10.21203/rs.3.rs-1862992/v1), 2022-07-18
Supplement: Supplementary file 9 [file bbe21ec1dd744917ef88bd4f.xlsx]

## Sheet: GO terms (Argot2.5)
			Supplementary Table S5 : GO terms by Argot2.5 for all the HPs.				We set cut-off Total score ≥ 200 and did not use HMMer.
	Protein product	GO ID	Molecular Process	GO ID	Biological Function	GO ID	Cellular Component
1	WP_228767678.1	Absent	Absent	Absent	Absent	Absent	Absent
2	WP_234026581.1	Absent	Absent	Absent	Absent	Absent	Absent
3	WP_009328007.1	Absent	Absent	Absent	Absent	Absent	Absent
4	WP_020453406.1	Absent	Absent	Absent	Absent	Absent	Absent
5	WP_023857319.1	Absent	Absent	Absent	Absent	Absent	Absent
6	WP_020450851.1	Absent	Absent	Absent	Absent	Absent	Absent
7	WP_020451800.1	Absent	Absent	Absent	Absent	Absent	Absent
8	WP_023856733.1	Absent	Absent	Absent	Absent	Absent	Absent
9	WP_023857374.1	Absent	Absent	Absent	Absent	Absent	Absent
10	WP_020451847.1	Absent	Absent	Absent	Absent	Absent	Absent
11	WP_153247060.1	Absent	Absent	Absent	Absent	Absent	Absent
12	WP_023856549.1	Absent	Absent	Absent	Absent	Absent	Absent
13	WP_095290311.1	Absent	Absent	Absent	Absent	Absent	Absent
14	WP_155266823.1	Absent	Absent	Absent	Absent	Absent	Absent
15	WP_158700706.1	Absent	Absent	Absent	Absent	Absent	Absent
16	WP_023857161.1	Absent	Absent	Absent	Absent	Absent	Absent
17	WP_023857015.1	Absent	Absent	Absent	Absent	Absent	Absent
18	WP_020453636.1	Absent	Absent	Absent	Absent	Absent	Absent
19	WP_003180548.1	Absent	Absent	Absent	Absent	Absent	Absent
20	WP_023857597.1	Absent	Absent	Absent	Absent	Absent	Absent
21	WP_165688282.1	Absent	Absent	Absent	Absent	Absent	Absent
22	WP_020452574.1	Absent	Absent	Absent	Absent	Absent	Absent
23	WP_021837703.1	Absent	Absent	Absent	Absent	Absent	Absent
24	WP_020453188.1	Absent	Absent	Absent	Absent	Absent	Absent
25	WP_020451158.1	Absent	Absent	Absent	Absent	Absent	Absent
26	WP_165395385.1	Absent	Absent	Absent	Absent	Absent	Absent
27	WP_164468295.1	Absent	Absent	Absent	Absent	Absent	Absent
28	WP_020451198.1	Absent	Absent	Absent	Absent	Absent	Absent
29	WP_003182852.1	Absent	Absent	Absent	Absent	Absent	Absent
30	WP_164468298.1	Absent	Absent	Absent	Absent	Absent	Absent
31	WP_164468297.1	Absent	Absent	Absent	Absent	Absent	Absent
32	WP_023856286.1	Absent	Absent	Absent	Absent	Absent	Absent
33	WP_164468296.1	Absent	Absent	Absent	Absent	Absent	Absent
34	WP_164943111.1	Absent	Absent	Absent	Absent	Absent	Absent
35	WP_026580436.1	Absent	Absent	Absent	Absent	Absent	Absent
36	WP_020450539.1	Absent	Absent	Absent	Absent	Absent	Absent
37	WP_020451115.1	Absent	Absent	Absent	Absent	Absent	Absent
38	WP_023857627.1	Absent	Absent	Absent	Absent	Absent	Absent
39	WP_023855260.1	Absent	Absent	Absent	Absent	Absent	Absent
40	WP_228767692.1	Absent	Absent	Absent	Absent	Absent	Absent
41	WP_165389270.1	Absent	Absent	Absent	Absent	Absent	Absent
42	WP_230368348.1	GO:0003677	DNA binding	Absent	Absent	Absent	Absent
43	WP_165583461.1	Absent	Absent	Absent	Absent	Absent	Absent
44	WP_020453503.1	Absent	Absent	Absent	Absent	Absent	Absent
45	WP_158700709.1	Absent	Absent	Absent	Absent	GO:0015688	iron chelate transport
46	WP_153247050.1	Absent	Absent	Absent	Absent	Absent	Absent
47	WP_020451723.1	Absent	Absent	Absent	Absent	Absent	Absent
48	WP_023856228.1	GO:0005515	protein binding	Absent	Absent	Absent	Absent
49	WP_023856663.1	Absent	Absent	Absent	Absent	Absent	Absent
50	WP_023857159.1	Absent	Absent	Absent	Absent	Absent	Absent
51	WP_023855671.1	Absent	Absent	Absent	Absent	Absent	Absent
52	WP_165395376.1	Absent	Absent	Absent	Absent	Absent	Absent
53	WP_199792114.1	Absent	Absent	Absent	Absent	Absent	Absent
54	WP_023856975.1	Absent	Absent	Absent	Absent	Absent	Absent
55	WP_020451569.1	Absent	Absent	Absent	Absent	Absent	Absent
56	WP_020452191.1	Absent	Absent	Absent	Absent	Absent	Absent
57	WP_020452736.1	Absent	Absent	Absent	Absent	Absent	Absent
58	WP_026579630.1	Absent	Absent	Absent	Absent	GO:0016020	membrane
59	WP_020451906.1	Absent	Absent	Absent	Absent	Absent	Absent
60	WP_095291354.1	Absent	Absent	Absent	Absent	GO:0016020	membrane
61	WP_023857771.1	Absent	Absent	Absent	Absent	Absent	Absent
62	WP_105980883.1	Absent	Absent	Absent	Absent	Absent	Absent
63	WP_020451116.1	Absent	Absent	Absent	Absent	Absent	Absent
64	WP_023855265.1	Absent	Absent	Absent	Absent	Absent	Absent
65	WP_003183993.1	Absent	Absent	Absent	Absent	Absent	Absent
66	WP_020452567.1	Absent	Absent	Absent	Absent	Absent	Absent
67	WP_026579058.1	Absent	Absent	Absent	Absent	Absent	Absent
68	WP_003180439.1	Absent	Absent	GO:0030435	sporulation resulting in formation of a cellular spore	Absent	Absent
69	WP_020451131.1	Absent	Absent	Absent	Absent	Absent	Absent
70	WP_003182837.1	Absent	Absent	GO:0006351	transcription, DNA-templated	Absent	Absent
71	WP_095290960.1	Absent	Absent	Absent	Absent	Absent	Absent
72	WP_050821090.1	Absent	Absent	Absent	Absent	Absent	Absent
73	WP_003179806.1	Absent	Absent	Absent	Absent	Absent	Absent
74	WP_026579962.1	Absent	Absent	Absent	Absent	Absent	Absent
75	WP_105980949.1	Absent	Absent	Absent	Absent	Absent	Absent
76	WP_023856963.1	Absent	Absent	Absent	Absent	Absent	Absent
77	WP_020450116.1	Absent	Absent	Absent	Absent	Absent	Absent
78	WP_020450431.1	Absent	Absent	Absent	Absent	Absent	Absent
79	WP_026579880.1	Absent	Absent	Absent	Absent	Absent	Absent
80	WP_020451253.1	Absent	Absent	Absent	Absent	Absent	Absent
81	WP_003184678.1	Absent	Absent	Absent	Absent	Absent	Absent
82	WP_039072587.1	Absent	Absent	Absent	Absent	Absent	Absent
83	WP_016885531.1	Absent	Absent	Absent	Absent	Absent	Absent
84	WP_020452457.1	Absent	Absent	Absent	Absent	Absent	Absent
85	WP_020452690.1	Absent	Absent	Absent	Absent	Absent	Absent
86	WP_234026547.1	Absent	Absent	Absent	Absent	Absent	Absent
87	WP_020451168.1	Absent	Absent	Absent	Absent	Absent	Absent
88	WP_023857457.1	Absent	Absent	Absent	Absent	Absent	Absent
89	WP_020453450.1	Absent	Absent	Absent	Absent	Absent	Absent
90	WP_003180298.1	Absent	Absent	Absent	Absent	Absent	Absent
91	WP_154495611.1	Absent	Absent	Absent	Absent	Absent	Absent
92	WP_165973178.1	Absent	Absent	GO:0009847	spore germination	Absent	Absent
93	WP_105980779.1	Absent	Absent	Absent	Absent	Absent	Absent
94	WP_234026567.1	Absent	Absent	Absent	Absent	Absent	Absent
95	WP_020451719.1	Absent	Absent	Absent	Absent	GO:0016020	membrane
96	WP_020452772.1	Absent	Absent	Absent	Absent	Absent	Absent
97	WP_020452822.1	Absent	Absent	Absent	Absent	Absent	Absent
98	WP_023857616.1	Absent	Absent	Absent	Absent	Absent	Absent
99	WP_158700708.1	Absent	Absent	Absent	Absent	Absent	Absent
100	WP_023856949.1	GO:0004386	helicase activity	Absent	Absent	Absent	Absent
101	WP_026578971.1	Absent	Absent	Absent	Absent	Absent	Absent
102	WP_023856615.1	Absent	Absent	Absent	Absent	Absent	Absent
103	WP_065643375.1	Absent	Absent	Absent	Absent	Absent	Absent
104	WP_224146215.1	Absent	Absent	GO:0016310	phosphorylation	Absent	Absent
105	WP_020451793.1	Absent	Absent	Absent	Absent	Absent	Absent
106	WP_234026570.1	Absent	Absent	Absent	Absent	Absent	Absent
107	WP_023856434.1	Absent	Absent	Absent	Absent	Absent	Absent
108	WP_020450662.1	Absent	Absent	Absent	Absent	Absent	Absent
109	WP_020451502.1	Absent	Absent	Absent	Absent	Absent	Absent
110	WP_023855949.1	Absent	Absent	Absent	Absent	Absent	Absent
111	WP_095291534.1	Absent	Absent	Absent	Absent	Absent	Absent
112	WP_125897635.1	Absent	Absent	Absent	Absent	Absent	Absent
113	WP_003180249.1	Absent	Absent	Absent	Absent	Absent	Absent
114	WP_035399921.1	Absent	Absent	Absent	Absent	Absent	Absent
115	WP_105980662.1	Absent	Absent	Absent	Absent	Absent	Absent
116	WP_026580457.1	Absent	Absent	Absent	Absent	Absent	Absent
117	WP_026580535.1	Absent	Absent	Absent	Absent	GO:0016020	membrane
118	WP_020450496.1	Absent	Absent	Absent	Absent	Absent	Absent
119	WP_223254789.1	Absent	Absent	Absent	Absent	Absent	Absent
120	WP_025810497.1	Absent	Absent	Absent	Absent	Absent	Absent
121	WP_020449908.1	Absent	Absent	Absent	Absent	Absent	Absent
122	WP_020451497.1	Absent	Absent	Absent	Absent	Absent	Absent
123	WP_026579662.1	Absent	Absent	Absent	Absent	Absent	Absent
124	WP_230368259.1	Absent	Absent	Absent	Absent	GO:0019028	viral capsid
125	WP_020450628.1	Absent	Absent	Absent	Absent	Absent	Absent
126	WP_020450771.1	Absent	Absent	Absent	Absent	Absent	Absent
127	WP_020451022.1	Absent	Absent	Absent	Absent	Absent	Absent
128	WP_020451692.1	Absent	Absent	Absent	Absent	Absent	Absent
129	WP_020452227.1	Absent	Absent	GO:0006355	regulation of transcription, DNA-templated	Absent	Absent
130	WP_023856126.1	Absent	Absent	Absent	Absent	Absent	Absent
131	WP_020450130.1	GO:0016829	lyase activity	Absent	Absent	Absent	Absent
132	WP_228119622.1	Absent	Absent	Absent	Absent	Absent	Absent
133	WP_020452508.1	Absent	Absent	Absent	Absent	Absent	Absent
134	WP_025811974.1	Absent	Absent	Absent	Absent	Absent	Absent
135	WP_026580162.1	Absent	Absent	Absent	Absent	Absent	Absent
136	WP_023856150.1	Absent	Absent	Absent	Absent	Absent	Absent
137	WP_048350210.1	Absent	Absent	Absent	Absent	Absent	Absent
138	WP_105980953.1	Absent	Absent	Absent	Absent	Absent	Absent
139	WP_234026545.1	GO:0008233 GO:0016787	peptidase activity hydrolase activity	GO:0006508	proteolysis	Absent	Absent
140	WP_095292663.1	Absent	Absent	Absent	Absent	Absent	Absent
141	WP_020450928.1	Absent	Absent	Absent	Absent	Absent	Absent
142	WP_020451230.1	Absent	Absent	Absent	Absent	Absent	Absent
143	WP_003179940.1	Absent	Absent	Absent	Absent	Absent	Absent
144	WP_020450117.1	Absent	Absent	Absent	Absent	Absent	Absent
145	WP_128822602.1	Absent	Absent	Absent	Absent	Absent	Absent
146	WP_035337816.1	GO:0047355	CDP-glycerol glycerophosphotransferase activity	Absent	Absent	Absent	Absent
147	WP_023857017.1	Absent	Absent	Absent	Absent	Absent	Absent
148	WP_020450232.1	Absent	Absent	Absent	Absent	GO:0016020	membrane
149	WP_020451531.1	Absent	Absent	Absent	Absent	Absent	Absent
150	WP_020451864.1	Absent	Absent	Absent	Absent	Absent	Absent
151	WP_023856221.1	Absent	Absent	Absent	Absent	Absent	Absent
152	WP_020453451.1	Absent	Absent	Absent	Absent	Absent	Absent
153	WP_020451839.1	Absent	Absent	Absent	Absent	Absent	Absent
154	WP_020452482.1	Absent	Absent	Absent	Absent	Absent	Absent
155	WP_105980652.1	Absent	Absent	Absent	Absent	GO:0016020	membrane
156	WP_105980763.1	Absent	Absent	Absent	Absent	Absent	Absent
157	WP_003180714.1	Absent	Absent	Absent	Absent	Absent	Absent
158	WP_105981185.1	Absent	Absent	Absent	Absent	Absent	Absent
159	WP_020449960.1	Absent	Absent	GO:0006974	cellular response to DNA damage stimulus	GO:0016020	membrane
160	WP_033155046.1	GO:0016740	transferase activity	GO:0032259	methylation	GO:0016020	membrane
161	WP_039073125.1	Absent	Absent	Absent	Absent	Absent	Absent
162	WP_026580529.1	Absent	Absent	Absent	Absent	GO:0016020	membrane
163	WP_105980748.1	Absent	Absent	Absent	Absent	Absent	Absent
164	WP_105981192.1	Absent	Absent	Absent	Absent	Absent	Absent
165	WP_023856183.1	Absent	Absent	Absent	Absent	Absent	Absent
166	WP_023857054.1	Absent	Absent	Absent	Absent	Absent	Absent
167	WP_023857023.1	Absent	Absent	Absent	Absent	Absent	Absent
168	WP_026580364.1	Absent	Absent	Absent	Absent	Absent	Absent
169	WP_020453622.1	Absent	Absent	Absent	Absent	Absent	Absent
170	WP_020451229.1	Absent	Absent	Absent	Absent	GO:0016020	membrane
171	WP_105981056.1	Absent	Absent	Absent	Absent	Absent	Absent
172	WP_020451257.1	Absent	Absent	Absent	Absent	GO:0016020	membrane
173	WP_026580277.1	Absent	Absent	Absent	Absent	Absent	Absent
174	WP_023857365.1	Absent	Absent	Absent	Absent	Absent	Absent
175	WP_020450785.1	Absent	Absent	Absent	Absent	Absent	Absent
176	WP_105980947.1	Absent	Absent	Absent	Absent	Absent	Absent
177	WP_039072786.1	Absent	Absent	Absent	Absent	Absent	Absent
178	WP_023857367.1	Absent	Absent	Absent	Absent	Absent	Absent
179	WP_020452517.1	Absent	Absent	Absent	Absent	Absent	Absent
180	WP_158700700.1	Absent	Absent	Absent	Absent	Absent	Absent
181	WP_006638778.1	GO:0003677	DNA binding	GO:0006355	regulation of transcription, DNA-templated	Absent	Absent
182	WP_020450469.1	Absent	Absent	Absent	Absent	Absent	Absent
183	WP_105981191.1	Absent	Absent	Absent	Absent	Absent	Absent
184	WP_105980655.1	Absent	Absent	Absent	Absent	Absent	Absent
185	WP_020450376.1	Absent	Absent	Absent	Absent	Absent	Absent
186	WP_011197680.1	Absent	Absent	Absent	Absent	Absent	Absent
187	WP_003185302.1	Absent	Absent	Absent	Absent	Absent	Absent
188	WP_048350642.1	Absent	Absent	Absent	Absent	Absent	Absent
189	WP_076792973.1	Absent	Absent	Absent	Absent	Absent	Absent
190	WP_003180149.1	Absent	Absent	Absent	Absent	Absent	Absent
191	WP_224066935.1	Absent	Absent	Absent	Absent	Absent	Absent
192	WP_020452104.1	Absent	Absent	Absent	Absent	GO:0016020	membrane
193	WP_003180123.1	GO:0005515	protein binding	GO:0006351	transcription, DNA-templated	GO:0016020	membrane
194	WP_023857019.1	Absent	Absent	Absent	Absent	Absent	Absent
195	WP_051303796.1	GO:0003677	DNA binding	Absent	Absent	Absent	Absent
196	WP_026587168.1	Absent	Absent	Absent	Absent	Absent	Absent
197	WP_105981206.1	Absent	Absent	Absent	Absent	Absent	Absent
198	WP_020451007.1	Absent	Absent	Absent	Absent	Absent	Absent
199	WP_020452196.1	GO:0016740	transferase activity	GO:0032259	methylation	GO:0016020	membrane
200	WP_025810876.1	Absent	Absent	Absent	Absent	Absent	Absent
201	WP_023857706.1	Absent	Absent	Absent	Absent	Absent	Absent
202	WP_105980650.1	Absent	Absent	Absent	Absent	Absent	Absent
203	WP_105980657.1	Absent	Absent	GO:0006810	transport	GO:001602	membrane
204	WP_105980659.1	Absent	Absent	Absent	Absent	GO:0016021	ntegral component of membrane
205	WP_105980661.1	Absent	Absent	Absent	Absent	Absent	Absent
206	WP_043054026.1	Absent	Absent	Absent	Absent	Absent	Absent
207	WP_234026552.1	Absent	Absent	Absent	Absent	Absent	Absent
208	WP_026580443.1	Absent	Absent	Absent	Absent	Absent	Absent
209	WP_023857730.1	Absent	Absent	Absent	Absent	Absent	Absent
210	WP_023857731.1	Absent	Absent	Absent	Absent	Absent	Absent
211	WP_025810847.1	Absent	Absent	Absent	Absent	GO:0030288	outer membrane-bounded periplasmic space
212	WP_025810827.1	Absent	Absent	Absent	Absent	Absent	Absent
213	WP_020450003.1	Absent	Absent	Absent	Absent	Absent	Absent
214	WP_223254833.1	Absent	Absent	Absent	Absent	Absent	Absent
215	WP_105980699.1	Absent	Absent	Absent	Absent	GO:0016020	membrane
216	WP_224066812.1	Absent	Absent	Absent	Absent	GO:0016020	membrane
217	WP_105980700.1	Absent	Absent	Absent	Absent	GO:0016020	membrane
218	WP_105980701.1	Absent	Absent	Absent	Absent	GO:0016020	membrane
219	WP_026580557.1	Absent	Absent	Absent	Absent	Absent	Absent
220	WP_023857878.1	Absent	Absent	Absent	Absent	GO:0016020	membrane
221	WP_105980731.1	GO:0016740	transferase activity	Absent	Absent	Absent	Absent
222	WP_039073246.1	Absent	Absent	Absent	Absent	Absent	Absent
223	WP_105980762.1	Absent	Absent	Absent	Absent	Absent	Absent
224	WP_206761178.1	Absent	Absent	Absent	Absent	Absent	Absent
225	WP_020450411.1	Absent	Absent	Absent	Absent	Absent	Absent
226	WP_020450414.1	Absent	Absent	Absent	Absent	Absent	Absent
227	WP_158700702.1	Absent	Absent	Absent	Absent	Absent	Absent
228	WP_105980768.1	Absent	Absent	Absent	Absent	GO:0016020	membrane
229	WP_105980784.1	Absent	Absent	Absent	Absent	Absent	Absent
230	WP_020450498.1	Absent	Absent	Absent	Absent	Absent	Absent
231	WP_020450568.1	Absent	Absent	Absent	Absent	Absent	Absent
232	WP_105980813.1	Absent	Absent	Absent	Absent	Absent	Absent
233	WP_026580647.1	Absent	Absent	GO:0006281	DNA repair	Absent	Absent
234	WP_231006255.1	Absent	Absent	Absent	Absent	Absent	Absent
235	WP_025810228.1	Absent	Absent	Absent	Absent	Absent	Absent
236	WP_075213735.1	Absent	Absent	Absent	Absent	Absent	Absent
237	WP_234026559.1	Absent	Absent	Absent	Absent	Absent	Absent
238	WP_023856435.1	Absent	Absent	GO:0009159	deoxyribonucleoside monophosphate catabolic process	Absent	Absent
239	WP_105980826.1	Absent	Absent	Absent	Absent	Absent	Absent
240	WP_105980827.1	Absent	Absent	Absent	Absent	Absent	Absent
241	WP_105980828.1	Absent	Absent	Absent	Absent	Absent	Absent
242	WP_025811868.1	Absent	Absent	Absent	Absent	GO:0016020	membrane
243	WP_025811867.1	Absent	Absent	Absent	Absent	Absent	Absent
244	WP_105980832.1	Absent	Absent	Absent	Absent	Absent	Absent
245	WP_039072542.1	Absent	Absent	GO:0006265	DNA topological change	Absent	Absent
246	WP_026580008.1	Absent	Absent	Absent	Absent	Absent	Absent
247	WP_051303785.1	Absent	Absent	Absent	Absent	GO:0016020	membrane
248	WP_025811843.1	Absent	Absent	Absent	Absent	Absent	Absent
249	WP_105980834.1	Absent	Absent	Absent	Absent	Absent	Absent
250	WP_025811820.1	Absent	Absent	Absent	Absent	Absent	Absent
251	WP_020450817.1	Absent	Absent	Absent	Absent	Absent	Absent
252	WP_105980857.1	Absent	Absent	Absent	Absent	Absent	Absent
253	WP_026579936.1	Absent	Absent	Absent	Absent	Absent	Absent
254	WP_026579932.1	Absent	Absent	Absent	Absent	Absent	Absent
255	WP_023856614.1	Absent	Absent	Absent	Absent	Absent	Absent
256	WP_020450926.1	GO:0016787	hydrolase activity	Absent	Absent	Absent	Absent
257	WP_105980873.1	Absent	Absent	Absent	Absent	Absent	Absent
258	WP_009328837.1	GO:0003824	catalytic activity	Absent	Absent	GO:0016020	membrane
259	WP_003180659.1	GO:0016740	transferase activity	Absent	Absent	Absent	Absent
260	WP_003180698.1	Absent	Absent	Absent	Absent	GO:0019028	viral capsid
261	WP_003180732.1	Absent	Absent	Absent	Absent	Absent	Absent
262	WP_026579884.1	Absent	Absent	Absent	Absent	Absent	Absent
263	WP_023856697.1	Absent	Absent	Absent	Absent	Absent	Absent
264	WP_105980889.1	Absent	Absent	Absent	Absent	Absent	Absent
265	WP_035338940.1	Absent	Absent	Absent	Absent	Absent	Absent
266	WP_026579851.1	Absent	Absent	Absent	Absent	Absent	Absent
267	WP_199792123.1	GO:0003824	catalytic activity	GO:0005975	carbohydrate metabolic process	Absent	Absent
268	WP_026579823.1	Absent	Absent	Absent	Absent	Absent	Absent
269	WP_026579821.1	Absent	Absent	Absent	Absent	Absent	Absent
270	WP_020451108.1	Absent	Absent	Absent	Absent	Absent	Absent
271	WP_020451113.1	Absent	Absent	Absent	Absent	Absent	Absent
272	WP_105980912.1	GO:0005215	transporter activity	GO:0006810	transport	GO:0016020	membrane
273	WP_020451163.1	Absent	Absent	Absent	Absent	Absent	Absent
274	WP_075213209.1	Absent	Absent	Absent	Absent	Absent	Absent
275	WP_020451191.1	Absent	Absent	Absent	Absent	Absent	Absent
276	WP_020451209.1	GO:0003677	DNA binding	GO:0006351	transcription, DNA-templated	GO:0005737	cytoplasm
277	WP_020451217.1	Absent	Absent	Absent	Absent	Absent	Absent
278	WP_105980919.1	Absent	Absent	Absent	Absent	GO:0016020	membrane
279	WP_023857266.1	GO:0016740	transferase activity	GO:0042128	nitrate assimilation	Absent	Absent
280	WP_026579751.1	GO:0008270	zinc ion binding	Absent	Absent	Absent	Absent
281	WP_234026566.1	GO:0016740	transferase activity	GO:0006266	DNA ligation	Absent	Absent
282	WP_105980946.1	GO:0004519	endonuclease activity	GO:0090305	nucleic acid phosphodiester bond hydrolysis	Absent	Absent
283	WP_158700703.1	Absent	Absent	Absent	Absent	Absent	Absent
284	WP_105980950.1	Absent	Absent	Absent	Absent	Absent	Absent
285	WP_020451469.1	Absent	Absent	Absent	Absent	Absent	Absent
286	WP_025811456.1	Absent	Absent	Absent	Absent	Absent	Absent
287	WP_020451493.1	Absent	Absent	Absent	Absent	Absent	Absent
288	WP_105980957.1	GO:0016787	hydrolase activity	Absent	Absent	Absent	Absent
289	WP_023857630.1	Absent	Absent	Absent	Absent	Absent	Absent
290	WP_023857629.1	Absent	Absent	Absent	Absent	Absent	Absent
291	WP_103750441.1	Absent	Absent	Absent	Absent	Absent	Absent
292	WP_105980972.1	Absent	Absent	Absent	Absent	Absent	Absent
293	WP_039072731.1	Absent	Absent	Absent	Absent	Absent	Absent
294	WP_039072733.1	Absent	Absent	Absent	Absent	Absent	Absent
295	WP_026579660.1	GO:0003677	DNA binding	GO:0006351	transcription, DNA-templated	GO:0009295	nucleoid
296	WP_026579659.1	Absent	Absent	Absent	Absent	Absent	Absent
297	WP_026579657.1	Absent	Absent	Absent	Absent	Absent	Absent
298	WP_020451581.1	Absent	Absent	Absent	Absent	Absent	Absent
299	WP_026579652.1	Absent	Absent	Absent	Absent	Absent	Absent
300	WP_020451608.1	Absent	Absent	Absent	Absent	Absent	Absent
301	WP_020451623.1	Absent	Absent	Absent	Absent	Absent	Absent
302	WP_020451626.1	Absent	Absent	Absent	Absent	Absent	Absent
303	WP_023857538.1	Absent	Absent	Absent	Absent	Absent	Absent
304	WP_079289103.1	GO:0004180	carboxypeptidase activity	GO:0006508	proteolysis	GO:0016020	membrane
305	WP_020451763.1	Absent	Absent	Absent	Absent	Absent	Absent
306	WP_020451766.1	Absent	Absent	Absent	Absent	Absent	Absent
307	WP_079289251.1	Absent	Absent	Absent	Absent	Absent	Absent
308	WP_020451788.1	Absent	Absent	Absent	Absent	Absent	Absent
309	WP_031305168.1	Absent	Absent	Absent	Absent	Absent	Absent
310	WP_020451848.1	Absent	Absent	Absent	Absent	Absent	Absent
311	WP_020451907.1	Absent	Absent	Absent	Absent	Absent	Absent
312	WP_020451908.1	Absent	Absent	Absent	Absent	GO:0019028	viral capsid
313	WP_020451915.1	Absent	Absent	Absent	Absent	Absent	Absent
314	WP_224067372.1	GO:0003746	translation elongation factor activity	GO:0006414	translational elongation	Absent	Absent
315	WP_020451965.1	Absent	Absent	Absent	Absent	Absent	Absent
316	WP_026579374.1	Absent	Absent	Absent	Absent	GO:0016020	membrane
317	WP_020452015.1	Absent	Absent	Absent	Absent	Absent	Absent
318	WP_026579354.1	Absent	Absent	Absent	Absent	Absent	Absent
319	WP_020452052.1	Absent	Absent	Absent	Absent	Absent	Absent
320	WP_023855959.1	Absent	Absent	Absent	Absent	Absent	Absent
321	WP_095291176.1	Absent	Absent	Absent	Absent	Absent	Absent
322	WP_020452152.1	Absent	Absent	Absent	Absent	GO:0016020	membrane
323	WP_023855191.1	Absent	Absent	Absent	Absent	Absent	Absent
324	WP_105981078.1	Absent	Absent	Absent	Absent	GO:0016020	membrane
325	WP_101561082.1	Absent	Absent	Absent	Absent	Absent	Absent
326	WP_011198121.1	GO:0003677	DNA binding	GO:0016192	vesicle-mediated transport	GO:0016020	membrane
327	WP_020452199.1	Absent	Absent	Absent	Absent	Absent	Absent
328	WP_023855219.1	Absent	Absent	Absent	Absent	GO:0016020	membrane
329	WP_026579290.1	Absent	Absent	Absent	Absent	GO:0019028	viral capsid
330	WP_224067291.1	Absent	Absent	Absent	Absent	Absent	Absent
331	WP_023855233.1	Absent	Absent	Absent	Absent	Absent	Absent
332	WP_105981089.1	Absent	Absent	Absent	Absent	Absent	Absent
333	WP_023855267.1	Absent	Absent	Absent	Absent	Absent	Absent
334	WP_026579257.1	Absent	Absent	Absent	Absent	Absent	Absent
335	WP_023855269.1	Absent	Absent	Absent	Absent	Absent	Absent
336	WP_234026541.1	Absent	Absent	Absent	Absent	Absent	Absent
337	WP_234026542.1	Absent	Absent	GO:0046677	response to antibiotic	GO:0016021	integral component of membrane
338	WP_234026543.1	Absent	Absent	Absent	Absent	Absent	Absent
339	WP_020452350.1	Absent	Absent	Absent	Absent	Absent	Absent
340	WP_026579215.1	Absent	Absent	Absent	Absent	Absent	Absent
341	WP_020452371.1	GO:0051213	dioxygenase activity	GO:0055114	oxidation-reduction process	GO:0016020	membrane
342	WP_023855405.1	Absent	Absent	Absent	Absent	Absent	Absent
343	WP_035338224.1	Absent	Absent	Absent	Absent	GO:0016020	membrane
344	WP_031304790.1	Absent	Absent	Absent	Absent	Absent	Absent
345	WP_023855473.1	Absent	Absent	Absent	Absent	GO:0016020	membrane
346	WP_020452544.1	Absent	Absent	Absent	Absent	Absent	Absent
347	WP_020452566.1	Absent	Absent	Absent	Absent	GO:0016020	membrane
348	WP_020452597.1	Absent	Absent	Absent	Absent	Absent	Absent
349	WP_234026546.1	Absent	Absent	Absent	Absent	Absent	Absent
350	WP_026579059.1	GO:0016787	hydrolase activity	Absent	Absent	Absent	Absent
351	WP_103750243.1	Absent	Absent	Absent	Absent	Absent	Absent
352	WP_023855527.1	GO:0016310	phosphorylation	Absent	Absent	Absent	Absent
353	WP_059231740.1	Absent	Absent	Absent	Absent	GO:0016020	membrane
354	WP_105981156.1	Absent	Absent	Absent	Absent	GO:0016020	membrane
355	WP_020452678.1	GO:0016787	hydrolase activity	Absent	Absent	Absent	Absent
356	WP_105981168.1	Absent	Absent	Absent	Absent	Absent	Absent
357	WP_075212930.1	Absent	Absent	Absent	Absent	Absent	Absent
358	WP_003184717.1	Absent	Absent	Absent	Absent	Absent	Absent
359	WP_023856112.1	Absent	Absent	Absent	Absent	Absent	Absent
360	WP_023856115.1	Absent	Absent	GO:0005975	carbohydrate metabolic process	Absent	Absent
361	WP_016886100.1	GO:0000166	nucleotide binding	GO:0006418	tRNA aminoacylation for protein translation	GO:0016020	membrane
362	WP_095240270.1	Absent	Absent	Absent	Absent	Absent	Absent
363	WP_105979937.1	Absent	Absent	Absent	Absent	Absent	Absent
364	WP_080627007.1	Absent	Absent	Absent	Absent	Absent	Absent
365	WP_105979929.1	Absent	Absent	Absent	Absent	Absent	Absent
366	WP_020450347.1	Absent	Absent	Absent	Absent	Absent	Absent
367	WP_020450346.1	Absent	Absent	Absent	Absent	Absent	Absent
368	WP_105981186.1	Absent	Absent	Absent	Absent	Absent	Absent
369	WP_105981189.1	Absent	Absent	Absent	Absent	Absent	Absent
370	WP_095323676.1	Absent	Absent	Absent	Absent	Absent	Absent
371	WP_105981199.1	GO:0016788	hydrolase activity, acting on ester bonds	GO:0006629	lipid metabolic process	Absent	Absent
372	WP_023856164.1	Absent	Absent	Absent	Absent	Absent	Absent
373	WP_065643725.1	GO:0016740	transferase activity	Absent	Absent	GO:0016020	membrane
374	WP_023856206.1	Absent	Absent	Absent	Absent	Absent	Absent
375	WP_224146402.1	Absent	Absent	Absent	Absent	Absent	Absent
376	WP_158700707.1	Absent	Absent	Absent	Absent	Absent	Absent
377	WP_023856311.1	Absent	Absent	Absent	Absent	Absent	Absent
378	WP_020452999.1	Absent	Absent	Absent	Absent	Absent	Absent
379	WP_105981243.1	Absent	Absent	Absent	Absent	Absent	Absent
380	WP_003185659.1	Absent	Absent	GO:1900192	positive regulation of single-species biofilm formation	GO:0005737	cytoplasm
381	WP_020453101.1	Absent	Absent	Absent	Absent	Absent	Absent
382	WP_026580170.1	Absent	Absent	Absent	Absent	Absent	Absent
383	WP_105981256.1	Absent	Absent	Absent	Absent	Absent	Absent
384	WP_035337789.1	GO:0016787	hydrolase activity	GO:0009103	lipopolysaccharide biosynthetic process	GO:0016020	membrane
385	WP_026580185.1	Absent	Absent	Absent	Absent	Absent	Absent
386	WP_026580209.1	Absent	Absent	Absent	Absent	Absent	Absent
387	WP_023857133.1	Absent	Absent	Absent	Absent	Absent	Absent
388	WP_103749405.1	Absent	Absent	Absent	Absent	Absent	Absent
389	WP_023857096.1	GO:0004222	metalloendopeptidase activity	GO:0006508	proteolysis	GO:0016020	membrane
390	WP_023857076.1	GO:0016740	transferase activity	Absent	Absent	Absent	Absent
391	WP_023856950.1	Absent	Absent	Absent	Absent	GO:0016020	membrane
392	WP_026580310.1	Absent	Absent	Absent	Absent	Absent	Absent
393	WP_155121659.1	Absent	Absent	Absent	Absent	Absent	Absent
394	WP_020453459.1	Absent	Absent	Absent	Absent	Absent	Absent
395	WP_025810569.1	Absent	Absent	Absent	Absent	Absent	Absent
396	WP_105981311.1	Absent	Absent	Absent	Absent	Absent	Absent
397	WP_020453490.1	Absent	Absent	Absent	Absent	Absent	Absent
398	WP_105981317.1	Absent	Absent	Absent	Absent	Absent	Absent
399	WP_095291275.1	Absent	Absent	Absent	Absent	Absent	Absent
400	WP_026580354.1	Absent	Absent	Absent	Absent	Absent	Absent
401	WP_229129193.1	Absent	Absent	Absent	Absent	Absent	Absent
402	WP_026580356.1	Absent	Absent	Absent	Absent	Absent	Absent
403	WP_051967027.1	Absent	Absent	Absent	Absent	Absent	Absent
404	WP_096748407.1	Absent	Absent	Absent	Absent	Absent	Absent
405	WP_026580359.1	Absent	Absent	Absent	Absent	Absent	Absent
406	WP_234026551.1	Absent	Absent	Absent	Absent	Absent	Absent
407	WP_105981320.1	Absent	Absent	Absent	Absent	Absent	Absent
408	WP_105981321.1	Absent	Absent	Absent	Absent	Absent	Absent
409	WP_023856884.1	GO:0003824	catalytic activity	GO:0005975	carbohydrate metabolic process	GO:0016020	membrane
410	WP_020453535.1	GO:0004664	prephenate dehydratase activity	GO:0009094	L-phenylalanine biosynthetic process	Absent	Absent
411	WP_020453557.1	Absent	Absent	Absent	Absent	Absent	Absent
412	WP_026580384.1	Absent	Absent	Absent	Absent	Absent	Absent
413	WP_105981339.1	GO:0008168	methyltransferase activity	GO:0032259	methylation	Absent	Absent
414	WP_020453614.1	Absent	Absent	Absent	Absent	GO:0016020	membrane
