# Supplementary material for: Functional Annotation Of Hypothetical Proteins From The Bacillus Paralicheniformis Strain Bac84 Reveals Proteins with Biotechnological Potentials – an In Silico Approach
Source: Research Square preprint supplement (doi:10.21203/rs.3.rs-1862992/v1), 2022-07-18
Supplement: Supplementary file 10 [file f425312b9c31d862eea31dd0.xlsx]

## Sheet: All HPs
	Supplementary Table S1 : All the hypothetical proteins from the Bacillus paralicheniformis strain Bac84.
No.	Accession	Start	Stop	Strand	GeneID	Locus tag	Protein product	Length	Protein Name	Fasta Sequences
1	NZ_CP023665.1	1398906	1398956	-	69284687	CP943_RS22635	WP_228767678.1	16	MULTISPECIES: hypothetical protein	>WP_228767678.1 MULTISPECIES: hypothetical protein [Bacillus] MIAFGMLIAVLSKKEK
2	NZ_CP023665.1	3331912	3331998	-	69284707	CP943_RS22735	WP_234026581.1	28	hypothetical protein	>WP_234026581.1 hypothetical protein [Bacillus paralicheniformis] MDEQIRSVAQNMSSSEKKLIYLNVKLTY
3	NZ_CP023665.1	2412667	2412771	+	56672054	CP943_RS12285	WP_009328007.1	34	MULTISPECIES: hypothetical protein	>WP_009328007.1 MULTISPECIES: hypothetical protein [Bacillus] MENNKKKSPAKTKPDAKQTDTLDKKLGGPNRPST
4	NZ_CP023665.1	4121463	4121570	-	69284714	CP943_RS22770	WP_020453406.1	35	MULTISPECIES: hypothetical protein	>WP_020453406.1 MULTISPECIES: hypothetical protein [Bacillus] MKKVFKSAVKWAPVIYPIAWKIIKSRREKKNLKAG
5	NZ_CP023665.1	1546304	1546417	+	69284691	CP943_RS22655	WP_023857319.1	37	MULTISPECIES: hypothetical protein	>WP_023857319.1 MULTISPECIES: hypothetical protein [Bacillus] MKTNRPNKIAGYAELFVKLHVLTEEQKKDIIKSIKIR
6	NZ_CP023665.1	1235852	1235968	+	56670890	CP943_RS06285	WP_020450851.1	38	MULTISPECIES: hypothetical protein	>WP_020450851.1 MULTISPECIES: hypothetical protein [Bacillus] MKKLFIVAAIAAVVCSGWFAAETHSPSGDMQIAEKMVG
7	NZ_CP023665.1	2300230	2300355	+	56671927	CP943_RS11630	WP_020451800.1	41	MULTISPECIES: hypothetical protein	>WP_020451800.1 MULTISPECIES: hypothetical protein [Bacillus] MQKKGIQNSSLEQLKNDHETESAFQQDNKSNKQQQNRNALK
8	NZ_CP023665.1	1453541	1453672	-	69284690	CP943_RS22650	WP_023856733.1	43	MULTISPECIES: hypothetical protein	>WP_023856733.1 MULTISPECIES: hypothetical protein [Bacillus] MKKLKKQVKHVDFAKFGLSDYTSLLRRRSEKIIKTLNKRKNKP
9	NZ_CP023665.1	2345823	2345954	+	56671973	CP943_RS11870	WP_023857374.1	43	MULTISPECIES: hypothetical protein	>WP_023857374.1 MULTISPECIES: hypothetical protein [Bacillus] MGKKQRNRVTGLKKNNHIPTKDVIAAEDAHEKEFSARKRKNTT
10	NZ_CP023665.1	2347381	2347515	+	69284699	CP943_RS22695	WP_020451847.1	44	MULTISPECIES: hypothetical protein	>WP_020451847.1 MULTISPECIES: hypothetical protein [Bacillus] MIQKTLEALDGEGFDLVLGKVLKAMFGLIVFGCFPYFLYLLFII
11	NZ_CP023665.1	238186	238323	+	56669923	CP943_RS01370	WP_153247060.1	45	MULTISPECIES: hypothetical protein	>WP_153247060.1 MULTISPECIES: hypothetical protein [Bacillus] MDVLTFGKGVYQDIHEKICSADEEGNPVPEMPEMVVEEKYEELQR
12	NZ_CP023665.1	1157363	1157500	+	62105684	CP943_RS22405	WP_023856549.1	45	MULTISPECIES: hypothetical protein	>WP_023856549.1 MULTISPECIES: hypothetical protein [Bacillus] MKAKLLFVAVSLAVVLTSSGFLADVGKAPSLYADKMITTDKEARV
13	NZ_CP023665.1	1434724	1434861	+	56671102	CP943_RS07375	WP_095290311.1	45	MULTISPECIES: hypothetical protein	>WP_095290311.1 MULTISPECIES: hypothetical protein [Bacillus] MHELHYSPSQLRELYEAPKPFKAFLYGLISYKLQILEKEARKGGT
14	NZ_CP023665.1	2767361	2767498	-	56674027	CP943_RS22310	WP_155266823.1	45	MULTISPECIES: hypothetical protein	>WP_155266823.1 MULTISPECIES: hypothetical protein [Bacillus] MNPNGGAKAACPNHILSIYDLLSREALDEREGFIREIGTKKAGCF
15	NZ_CP023665.1	3502269	3502406	-	56674032	CP943_RS22335	WP_158700706.1	45	MULTISPECIES: hypothetical protein	>WP_158700706.1 MULTISPECIES: hypothetical protein [Bacillus] MKTFDLLLKGASVVCPEGVRKTDIGVKDGMIAVLGVLDGSASIHF
16	NZ_CP023665.1	3857937	3858074	+	62105709	CP943_RS22530	WP_023857161.1	45	MULTISPECIES: hypothetical protein	>WP_023857161.1 MULTISPECIES: hypothetical protein [Bacillus] MLLQILVGGLVVFVIFFLVFRAIRTGNLPRHDDSQPEDGENRDQP
17	NZ_CP023665.1	4052412	4052549	+	62105713	CP943_RS22550	WP_023857015.1	45	MULTISPECIES: hypothetical protein	>WP_023857015.1 MULTISPECIES: hypothetical protein [Bacillus] MNETKQKTHPPVVEERFAKGCLFGILFSLPFWLMFYLFLQYMLTR
18	NZ_CP023665.1	6648	6788	-	62105677	CP943_RS22370	WP_020453636.1	46	MULTISPECIES: hypothetical protein	>WP_020453636.1 MULTISPECIES: hypothetical protein [Bacillus] MLDVLKDFFLFLSGGLRVTLLIAILIILLLIRKARKKNKEKSGFLD
19	NZ_CP023665.1	1308688	1308828	-	62105685	CP943_RS22410	WP_003180548.1	46	MULTISPECIES: hypothetical protein	>WP_003180548.1 MULTISPECIES: hypothetical protein [Bacillus] MGKRSKSKRFIQQGKDSLKQHAARFPYRSTLEEAEQKSGPTECGGL
20	NZ_CP023665.1	2023876	2024016	+	62105691	CP943_RS22440	WP_023857597.1	46	MULTISPECIES: hypothetical protein	>WP_023857597.1 MULTISPECIES: hypothetical protein [Bacillus] MKVMIGSIILLSIIGFGVWLMLSPLFKKVGSGASKIKKTLEDDKDE
21	NZ_CP023665.1	1144359	1144502	-	62105683	CP943_RS22400	WP_165688282.1	47	MULTISPECIES: hypothetical protein	>WP_165688282.1 MULTISPECIES: hypothetical protein [Bacillus] MQLMLSINWELIQFVGISLLNEYVSNVRPYHGIFCFRGAFSSGRSDV
22	NZ_CP023665.1	3156191	3156334	-	62105699	CP943_RS22480	WP_020452574.1	47	MULTISPECIES: hypothetical protein	>WP_020452574.1 MULTISPECIES: hypothetical protein [Bacillus] MKQDQSKHAYMYDADGDKETVQQISDAYFSGFVAHDDAQPLADADKQ
23	NZ_CP023665.1	3365760	3365903	-	62105704	CP943_RS22505	WP_021837703.1	47	MULTISPECIES: hypothetical protein	>WP_021837703.1 MULTISPECIES: hypothetical protein [Bacillus] MDEVRNWILATAGVVTIFKHIYDIWQNESKKRGKKKKKRSRRVSKKR
24	NZ_CP023665.1	3883851	3883994	-	56673547	CP943_RS19865	WP_020453188.1	47	MULTISPECIES: hypothetical protein	>WP_020453188.1 MULTISPECIES: hypothetical protein [Bacillus] MDDKELNQEEFLRILMHAYDIGEKSKDITTKELLEDLILHIKNGYTT
25	NZ_CP023665.1	1567593	1567739	+	56674021	CP943_RS22280	WP_020451158.1	48	MULTISPECIES: hypothetical protein	>WP_020451158.1 MULTISPECIES: hypothetical protein [Bacillus] MKNEKIFGIPQLKQYKKTPVKAPEFYMLLFMPHLQHPKVNFVLHRALE
26	NZ_CP023665.1	3181896	3182042	-	62105700	CP943_RS22485	WP_165395385.1	48	MULTISPECIES: hypothetical protein	>WP_165395385.1 MULTISPECIES: hypothetical protein [Bacillus] MNLFIAAKEKFMEDYNKQLETERKQEAQQSADGYNQLNQTENAAKWLK
27	NZ_CP023665.1	3996227	3996373	-	62105712	CP943_RS22545	WP_164468295.1	48	MULTISPECIES: hypothetical protein	>WP_164468295.1 MULTISPECIES: hypothetical protein [Bacillus] MAENSRLARFGLLPADRPPTQFFRFQGAGRSRLFYVSIPLAADFQCNR
28	NZ_CP023665.1	1612811	1612960	+	62105688	CP943_RS22425	WP_020451198.1	49	MULTISPECIES: hypothetical protein	>WP_020451198.1 MULTISPECIES: hypothetical protein [Bacillus] MKAFPSVICPNCKTTEHMDQVLTAQSNQNVIYRCDSCGFSLKNIPTKKG
29	NZ_CP023665.1	2388445	2388594	-	62105692	CP943_RS22445	WP_003182852.1	49	MULTISPECIES: hypothetical protein	>WP_003182852.1 MULTISPECIES: hypothetical protein [Bacillus] MGRTKLGNANAQRNNNAKKKNGFNTEFATESYSQMEAAKLISSKKQHQK
30	NZ_CP023665.1	2435977	2436126	-	62105694	CP943_RS22455	WP_164468298.1	49	MULTISPECIES: hypothetical protein	>WP_164468298.1 MULTISPECIES: hypothetical protein [Bacillus] MIELKLTPSQPLGLSTMSMAFSILTAADREPYGSRKGRCFLAHVSAVSL
31	NZ_CP023665.1	2932489	2932638	-	56674029	CP943_RS22320	WP_164468297.1	49	MULTISPECIES: hypothetical protein	>WP_164468297.1 MULTISPECIES: hypothetical protein [Bacillus] MQKNGRMPFIGHGYTSMPHSFKHGYGNPYRRQRMEMARQFGYWPHYWYY
32	NZ_CP023665.1	3626945	3627094	-	62105707	CP943_RS22520	WP_023856286.1	49	MULTISPECIES: hypothetical protein	>WP_023856286.1 MULTISPECIES: hypothetical protein [Bacillus] MKDKTVLVWTVSAVVYVGIVMLVYSILAAQEPIPDEKPHDGHALEEHAK
33	NZ_CP023665.1	3732244	3732396	-	62105708	CP943_RS22525	WP_164468296.1	50	MULTISPECIES: hypothetical protein	>WP_164468296.1 MULTISPECIES: hypothetical protein [Bacillus] MDKKHNYFIPSGLLIGLGIGIVFDHPAPGLLIGLGAGILLSAVVPKRNGK
34	NZ_CP023665.1	254860	255015	+	62105678	CP943_RS22375	WP_164943111.1	51	MULTISPECIES: hypothetical protein	>WP_164943111.1 MULTISPECIES: hypothetical protein [Bacillus] MKETVKVCNVGGKKMKIIVAEMNEPNYGKIASSIMRLTKNMKLESNKKSTA
35	NZ_CP023665.1	271188	271343	+	69284673	CP943_RS22565	WP_026580436.1	51	MULTISPECIES: hypothetical protein	>WP_026580436.1 MULTISPECIES: hypothetical protein [Bacillus] MNKLILPSIIVIFILWILLQISLNMNIFKNPLNYCIVIVIFFLFLKFAKEK
36	NZ_CP023665.1	882092	882247	-	62105681	CP943_RS22390	WP_020450539.1	51	MULTISPECIES: hypothetical protein	>WP_020450539.1 MULTISPECIES: hypothetical protein [Bacillus] MLFAIIGLIFFIESILLIVYAHKKKNGFLKYIGIVLSISIIVMIVTSLTHG
37	NZ_CP023665.1	1526037	1526192	+	56671190	CP943_RS07820	WP_020451115.1	51	MULTISPECIES: hypothetical protein	>WP_020451115.1 MULTISPECIES: hypothetical protein [Bacillus] MKEHKAVSLAKEIVALDIKRDELLETLMNLAGKDAFPLLRAVQNGFYQKSS
38	NZ_CP023665.1	1992276	1992431	+	62105689	CP943_RS22430	WP_023857627.1	51	MULTISPECIES: hypothetical protein	>WP_023857627.1 MULTISPECIES: hypothetical protein [Bacillus] MKMDEKRKELQEKYREEMKKKKNHRTYTIETIIVIAIVLLFIALNLIIDEF
39	NZ_CP023665.1	2817201	2817356	-	62105697	CP943_RS22470	WP_023855260.1	51	MULTISPECIES: hypothetical protein	>WP_023855260.1 MULTISPECIES: hypothetical protein [Bacillus] MGYPFPAGPCSYPAYPGYAGAAYGYAFVVVLLVVLLVIGGFYWLSPHGFFK
40	NZ_CP023665.1	3648021	3648176	-	56673316	CP943_RS18685	WP_228767692.1	51	MULTISPECIES: hypothetical protein	>WP_228767692.1 MULTISPECIES: hypothetical protein [Bacillus] MIKSKLNNTSYQEREDLEQELKMKICEKAEMLLCQEVPGFWEFITELLKVL
41	NZ_CP023665.1	503748	503906	-	62105680	CP943_RS22385	WP_165389270.1	52	MULTISPECIES: hypothetical protein	>WP_165389270.1 MULTISPECIES: hypothetical protein [Bacillus] MRLNLYAVVFIMLAVLSNVVLLCVFDQGVLAYTSAVIFLLAAAFCTKRRPEE
42	NZ_CP023665.1	1011368	1011526	-	69284681	CP943_RS22605	WP_230368348.1	52	hypothetical protein	>WP_230368348.1 hypothetical protein [Bacillus paralicheniformis] MSIYYVSARLGHADIETTSSTYAHLIKELRERDENETVNIFEEMAIEEAEIA
43	NZ_CP023665.1	1602347	1602505	-	62105687	CP943_RS22420	WP_165583461.1	52	MULTISPECIES: hypothetical protein	>WP_165583461.1 MULTISPECIES: hypothetical protein [Bacillus] MMGTIVTIKNHEMTILEGVSRAVYTEMLKDASDSEEQIYISWKEDVDFDYGY
44	NZ_CP023665.1	4226335	4226493	+	62105715	CP943_RS22560	WP_020453503.1	52	MULTISPECIES: hypothetical protein	>WP_020453503.1 MULTISPECIES: hypothetical protein [Bacillus] MMMFILILTMAVYLFYSFSKDNRPAKRNNKNHQTLTVIRENPFTAPSNDVNC
45	NZ_CP023665.1	4346299	4346457	+	56674038	CP943_RS22365	WP_158700709.1	52	hypothetical protein	>WP_158700709.1 hypothetical protein [Bacillus paralicheniformis] MIYIELLVFFGLYHCIKDGEVVKAGLVKRRVLRAVFQIGPRTNKPKCVTYNL
46	NZ_CP023665.1	3656683	3656844	-	56674033	CP943_RS22340	WP_153247050.1	53	MULTISPECIES: hypothetical protein	>WP_153247050.1 MULTISPECIES: hypothetical protein [Bacillus] MLIIESLIGYVCFFTVNAIYDTYIKKAKTPFGHLALISLVQTAIALSLFFIFS
47	NZ_CP023665.1	2210487	2210651	-	56674023	CP943_RS22290	WP_020451723.1	54	MULTISPECIES: hypothetical protein	>WP_020451723.1 MULTISPECIES: hypothetical protein [Bacillus] MIAFSVLCDGAIRLTEYVIHFSGFDESKAGSRLQPVQASPFPGRKNWRQYEKSA
48	NZ_CP023665.1	3550136	3550300	-	62105706	CP943_RS22515	WP_023856228.1	54	MULTISPECIES: hypothetical protein	>WP_023856228.1 MULTISPECIES: hypothetical protein [Bacillus] MKEIDDMIRRLRSRGIKVDKVKYPKHVLCEKKWMKKPKNTMKPSYRDFNGYSFI
49	NZ_CP023665.1	1360325	1360492	-	69284686	CP943_RS22630	WP_023856663.1	55	MULTISPECIES: hypothetical protein	>WP_023856663.1 MULTISPECIES: hypothetical protein [Bacillus] MLQIILGLASILFFFVLNILGLMNMFPLYITSPLLFISILFTLSRLNHRKTFKGF
50	NZ_CP023665.1	3863536	3863703	-	62105710	CP943_RS22535	WP_023857159.1	55	MULTISPECIES: hypothetical protein	>WP_023857159.1 MULTISPECIES: hypothetical protein [Bacillus] MKFVRAIWPFVGLVLIIAFMSAFKYSDELSNDEKAKISTEIQKVNQQDQTTENQQ
51	NZ_CP023665.1	426679	426849	+	62105679	CP943_RS22380	WP_023855671.1	56	MULTISPECIES: hypothetical protein	>WP_023855671.1 MULTISPECIES: hypothetical protein [Bacillus] MLRKLLKALQNGKNRRYSSSDYGRKSYKKYSSSDYKRKGYGHHHYKRKHKKFFGSS
52	NZ_CP023665.1	1423272	1423442	+	62105686	CP943_RS22415	WP_165395376.1	56	MULTISPECIES: hypothetical protein	>WP_165395376.1 MULTISPECIES: hypothetical protein [Bacillus] MCPLCNGRKSVHQDARIGTIFRACPNCRAESGDLTDVIKHLEALIAKMKTRVKQGA
53	NZ_CP023665.1	3387221	3387391	-	62105705	CP943_RS22510	WP_199792114.1	56	hypothetical protein	>WP_199792114.1 hypothetical protein [Bacillus paralicheniformis] MKKLLAFLLLILNDLLFVVGAAFILAAAYRFNTNIGLILTGVFFMFYAYLLTKKER
54	NZ_CP023665.1	4093468	4093638	-	69284713	CP943_RS22765	WP_023856975.1	56	MULTISPECIES: hypothetical protein	>WP_023856975.1 MULTISPECIES: hypothetical protein [Bacillus] MKSIDLTILSLKRKGIRTEKVSKNQCPDRLSNTNEKTDKHRNKNSQSKNMCKEKGE
55	NZ_CP023665.1	2011290	2011463	+	62105690	CP943_RS22435	WP_020451569.1	57	MULTISPECIES: hypothetical protein	>WP_020451569.1 MULTISPECIES: hypothetical protein [Bacillus] MLDKKKYFMIMVPALILAFLFQFFVPSEQRYLGIVFILAGGVIYYLWVHIEKDKQKD
56	NZ_CP023665.1	2725059	2725232	-	62105696	CP943_RS22465	WP_020452191.1	57	MULTISPECIES: hypothetical protein	>WP_020452191.1 MULTISPECIES: hypothetical protein [Bacillus] MRKVTFIAVGVIAALVFFQNRYRVINFILGQNQIRHYFIHLMMRIPFFRNKFIQQAF
57	NZ_CP023665.1	3336623	3336796	+	62105703	CP943_RS22500	WP_020452736.1	57	MULTISPECIES: hypothetical protein	>WP_020452736.1 MULTISPECIES: hypothetical protein [Bacillus] MREKYGLLIAIFILALCVHSNIVVEHALLQAIIKTVSLFVMIASALAAFVKGIRQPS
58	NZ_CP023665.1	2105036	2105212	-	56671779	CP943_RS10855	WP_026579630.1	58	MULTISPECIES: hypothetical protein	>WP_026579630.1 MULTISPECIES: hypothetical protein [Bacillus] MYNKKNVFDIVMYIIFGLISLYLVSKTDFGTGVLVFIAILYLAVIAYKVKQLFSNSNS
59	NZ_CP023665.1	2401060	2401236	-	62105693	CP943_RS22450	WP_020451906.1	58	MULTISPECIES: hypothetical protein	>WP_020451906.1 MULTISPECIES: hypothetical protein [Bacillus] MLNSDHIHMIQKALETSENQLEDIGEERLTYAKEELKNAISHMESTDHPFLTHSIYRK
60	NZ_CP023665.1	4093295	4093471	-	56673755	CP943_RS20925	WP_095291354.1	58	MULTISPECIES: hypothetical protein	>WP_095291354.1 MULTISPECIES: hypothetical protein [Bacillus] MNMYWFLGALLYFLIGTCIFIGVIRDIHSGSWMLLTLAAPIIIIGYPYFYSKKLFAKR
61	NZ_CP023665.1	341488	341667	+	56670032	CP943_RS01920	WP_023857771.1	59	MULTISPECIES: hypothetical protein	>WP_023857771.1 MULTISPECIES: hypothetical protein [Bacillus] MNTHFTGMLFVLSGIFLLNLAILSGINGVWWGLALGGSIIFNLIGVVLLMRYINEKRHT
62	NZ_CP023665.1	1405560	1405739	+	56671064	CP943_RS07185	WP_105980883.1	59	hypothetical protein	>WP_105980883.1 hypothetical protein [Bacillus paralicheniformis] MDLIPKSVDSILIVFLAIFFMWKFVYEIKHEKRKAVILLLLLINVYFIVKVFNLVLQLM
63	NZ_CP023665.1	1526297	1526476	+	56671191	CP943_RS07825	WP_020451116.1	59	MULTISPECIES: hypothetical protein	>WP_020451116.1 MULTISPECIES: hypothetical protein [Bacillus] MSRLLKNALEKERNHYSKKLSSLGEYNQDVLQRMTITELRKEYFYFFRKNKARVQNRPF
64	NZ_CP023665.1	2823298	2823477	-	56672465	CP943_RS14385	WP_023855265.1	59	MULTISPECIES: hypothetical protein	>WP_023855265.1 MULTISPECIES: hypothetical protein [Bacillus] MKNKRLFILSLIVLSVVMIGVQETFPNLLTTGLMTVVIAVAVFNILKESLNKKDETHSK
65	NZ_CP023665.1	2986360	2986539	+	56672631	CP943_RS15220	WP_003183993.1	59	MULTISPECIES: hypothetical protein	>WP_003183993.1 MULTISPECIES: hypothetical protein [Bacillus] METEYETKGYDLTKVYDYNQYPDVRHGRCDNCDYTLFKSSVKNGQFLRECRRCGMKKSI
66	NZ_CP023665.1	3150740	3150919	+	56672788	CP943_RS16020	WP_020452567.1	59	MULTISPECIES: hypothetical protein	>WP_020452567.1 MULTISPECIES: hypothetical protein [Bacillus] MYIYSYHQLARDKVNRIKLGYSAYAETESLASLIKRELRAQNIHVYEDVTDIGSWFIPE
67	NZ_CP023665.1	3213900	3214079	+	62105701	CP943_RS22490	WP_026579058.1	59	MULTISPECIES: hypothetical protein	>WP_026579058.1 MULTISPECIES: hypothetical protein [Bacillus] MELVVMTAVFRQDDACSVSRRFSFVREHRLSRPDNECEGLPTRKEADKTPVTEKEQKIK
68	NZ_CP023665.1	1262573	1262755	-	56670911	CP943_RS06395	WP_003180439.1	60	MULTISPECIES: hypothetical protein	>WP_003180439.1 MULTISPECIES: hypothetical protein [Bacillus] MNFTVVNRCFDVGNINITAVSSSSVFLIGDTECISLSSIFDTPPESLIVGPFVPLAPESR
69	NZ_CP023665.1	1541717	1541899	+	56671206	CP943_RS07900	WP_020451131.1	60	MULTISPECIES: hypothetical protein	>WP_020451131.1 MULTISPECIES: hypothetical protein [Bacillus] MKKHQKSKDMQNHKKPMNPDVLQEEFSNELGDVNAFKLIDVIENNKKKNKKADGQQRDKD
70	NZ_CP023665.1	2384581	2384763	-	56672020	CP943_RS12115	WP_003182837.1	60	MULTISPECIES: hypothetical protein	>WP_003182837.1 MULTISPECIES: hypothetical protein [Bacillus] MESNELQTVLHKTFVEVYKDLEQLVDIAKKGRPSLEKNIEEIEQRLKQNILAIEIQLKIK
71	NZ_CP023665.1	2841256	2841438	+	69284701	CP943_RS22705	WP_095290960.1	60	hypothetical protein	>WP_095290960.1 hypothetical protein [Bacillus paralicheniformis] MAFKSALSRKKVIAGRFSLDLKKEKMQREIAKELGISRIEKRTLMKMFHEFYRAEKEKRK
72	NZ_CP023665.1	3380708	3380890	-	56673034	CP943_RS17260	WP_050821090.1	60	MULTISPECIES: hypothetical protein	>WP_050821090.1 MULTISPECIES: hypothetical protein [Bacillus] MSDAVIDMYNALEQIGYTQNQIDEMDIVYHLRRLARRKEAGGKPAGEKEEKRLYIDQVLG
73	NZ_CP023665.1	929003	929188	+	56670567	CP943_RS04645	WP_003179806.1	61	MULTISPECIES: hypothetical protein	>WP_003179806.1 MULTISPECIES: SE1561 family protein [Bacillus] MGNAVHDKEQQVNYLKNRLDMFMSVIDSLDPESTDLEDIDRLISMLDDLEAKYERFKKDWK
74	NZ_CP023665.1	1157856	1158041	-	56670814	CP943_RS05895	WP_026579962.1	61	MULTISPECIES: hypothetical protein	>WP_026579962.1 MULTISPECIES: hypothetical protein [Bacillus] MENYYVTVFDTGGETLLNERFEAADDEEAKEKGRGMLKEKQFLEHTHRVVHSSGKIIVFRS
75	NZ_CP023665.1	1917748	1917933	+	56671577	CP943_RS09780	WP_105980949.1	61	hypothetical protein	>WP_105980949.1 hypothetical protein [Bacillus paralicheniformis] MNPRQAFRIFMRLQLENGVGEEMALFDAEIDKIILGIEDDQLDDILKEHIEDFGENYGIEL
76	NZ_CP023665.1	4106970	4107155	-	56673767	CP943_RS20985	WP_023856963.1	61	MULTISPECIES: hypothetical protein	>WP_023856963.1 MULTISPECIES: hypothetical protein [Bacillus] MKSDIEKLAECGLQNGAAAMMNRESQRLDAALYGTVGNAFDRDAGAEGKADGAGERLLYPK
77	NZ_CP023665.1	470039	470227	+	56670134	CP943_RS02445	WP_020450116.1	62	MULTISPECIES: hypothetical protein	>WP_020450116.1 MULTISPECIES: hypothetical protein [Bacillus] MALIFLVRLICLSVLACLALLLILNYAPFLAMPVWIALIIALIVCLYLAFKEETKEWRRRKH
78	NZ_CP023665.1	764187	764375	+	56670421	CP943_RS03905	WP_020450431.1	62	MULTISPECIES: hypothetical protein	>WP_020450431.1 MULTISPECIES: hypothetical protein [Bacillus] MANFLRKAVKQKKEYLIRQLAKSGRLDNLKDLSSYTLSDLEKEHRKLSESVGDRQRDHKHQL
79	NZ_CP023665.1	1403807	1403995	-	56671060	CP943_RS07165	WP_026579880.1	62	MULTISPECIES: hypothetical protein	>WP_026579880.1 MULTISPECIES: hypothetical protein [Bacillus] MNSKYTLQKTAITKLFNDNKISKEDLELMLAKLEREADLIDQQKNKRKELIKKARYRIFEHV
80	NZ_CP023665.1	1665644	1665832	+	56671332	CP943_RS08550	WP_020451253.1	62	MULTISPECIES: hypothetical protein	>WP_020451253.1 MULTISPECIES: hypothetical protein [Bacillus] MKPIVKQGLKEEKDNRAAVWRLEVDYELATLFEAMEKKDETQIELSKRKLERLRKEWIRLYG
81	NZ_CP023665.1	3312923	3313111	+	56672964	CP943_RS16905	WP_003184678.1	62	MULTISPECIES: hypothetical protein	>WP_003184678.1 MULTISPECIES: hypothetical protein [Bacillus] MNPYYMMLLCYVLSIIHFLIGYREALKISGADGLVNGTAMISCIPLGAVFAFFAHFFWKMTI
82	NZ_CP023665.1	1170067	1170258	+	56670829	CP943_RS05970	WP_039072587.1	63	MULTISPECIES: hypothetical protein	>WP_039072587.1 MULTISPECIES: hypothetical protein [Bacillus] MSVIIIVLTILSAVFTAGSFYYLRLLRYSASYPPKRILKQKALFCTGSAGLALLLLFFIQLLI
83	NZ_CP023665.1	2951185	2951376	-	56672597	CP943_RS15050	WP_016885531.1	63	MULTISPECIES: hypothetical protein	>WP_016885531.1 MULTISPECIES: hypothetical protein [Bacillus] MLVCPNCKSKNIGKIGVNQYYCWGCFIELTLSKGKISTHQVEEDGTLSSLDDLFSDDERTINL
84	NZ_CP023665.1	3014719	3014910	+	56672663	CP943_RS15380	WP_020452457.1	63	MULTISPECIES: hypothetical protein	>WP_020452457.1 MULTISPECIES: hypothetical protein [Bacillus] MRKKFNTHSFQPWLKQVRLVAVQVVLPITIFQGIRTIIFPTTFDVLLLGILIFLACAFHLDWI
85	NZ_CP023665.1	3282895	3283086	+	56672923	CP943_RS16695	WP_020452690.1	63	MULTISPECIES: hypothetical protein	>WP_020452690.1 MULTISPECIES: hypothetical protein [Bacillus] MNKESLLQAFYQEIHGADETAFQKAACSFMNLWDYEYGCLDGLPDQADRLIGQIVHEDLLLGD
86	NZ_CP023665.1	3462144	3462335	-	56673129	CP943_RS17750	WP_234026547.1	63	hypothetical protein	>WP_234026547.1 hypothetical protein [Bacillus paralicheniformis] MFLAFDRIIQEKGFCCFISADSCGGFAAAGDASDRTLWRIVLFAAIPVSVITAKLIQDRRKTE
87	NZ_CP023665.1	1575159	1575353	+	56671241	CP943_RS08080	WP_020451168.1	64	MULTISPECIES: hypothetical protein	>WP_020451168.1 MULTISPECIES: hypothetical protein [Bacillus] MTEQNAIDQIEQLRSGSIHELHVKKEDFLSFRAILTKQEDFKHFRGIAQHGGDIIFQYMKEARS
88	NZ_CP023665.1	2464679	2464873	-	56672111	CP943_RS12575	WP_023857457.1	64	MULTISPECIES: hypothetical protein	>WP_023857457.1 MULTISPECIES: hypothetical protein [Bacillus] MSESIEKFILAVVTTRRERVIGGTAAFFCDTPEEMNTYAKNLEAILDGIAHGIGDDLYLIVKHF
89	NZ_CP023665.1	4166569	4166763	+	56673825	CP943_RS21280	WP_020453450.1	64	MULTISPECIES: hypothetical protein	>WP_020453450.1 MULTISPECIES: hypothetical protein [Bacillus] MIVGMIGFILVGFFLYAAMAPSDGNNSGSSSSTFFVGGPDSSGDSGSDFGGGGDCGGGGDGGGC
90	NZ_CP023665.1	1190449	1190646	-	56670847	CP943_RS06065	WP_003180298.1	65	MULTISPECIES: hypothetical protein	>WP_003180298.1 MULTISPECIES: hypothetical protein [Bacillus] MYFYHDHCKKDYDFDYHKKDHDCKKYYYYYYYYYYPCYKKYDYDYDYKKFDHFDHCKKKKHYDYW
91	NZ_CP023665.1	3478496	3478693	-	56673149	CP943_RS17850	WP_154495611.1	65	MULTISPECIES: hypothetical protein	>WP_154495611.1 MULTISPECIES: hypothetical protein [Bacillus] MIAVALTAVFASLVVLSFSSQPKGNAEFAGRAIFLDDKPAQLMAGRAIFLDSFDGKAPAALQKTA
92	NZ_CP023665.1	4107289	4107486	+	62105714	CP943_RS22555	WP_165973178.1	65	MULTISPECIES: hypothetical protein	>WP_165973178.1 MULTISPECIES: hypothetical protein [Bacillus] MKSSQKKSAKASPGHDFQNKKRKEVERLAGDQVKVWMKSALGKLQGEYRTDVLKFWNRKSGREMG
93	NZ_CP023665.1	813380	813580	+	56670467	CP943_RS04140	WP_105980779.1	66	hypothetical protein	>WP_105980779.1 hypothetical protein [Bacillus paralicheniformis] MEPKGKNEPSPKAVKRLTWIIPIVLIGVIFLLKNIRNPVTDVLFYIVCASVIALVIFSIMKETKSR
94	NZ_CP023665.1	1917505	1917705	+	56671576	CP943_RS09775	WP_234026567.1	66	hypothetical protein	>WP_234026567.1 hypothetical protein [Bacillus paralicheniformis] MMNYNLNDETLKEIFDFYFESHAQKVEEVQFLENRVLVRTKSKVNKRIDIPEFIHKRPHRSKYTII
95	NZ_CP023665.1	2202782	2202982	-	56671839	CP943_RS11160	WP_020451719.1	66	MULTISPECIES: hypothetical protein	>WP_020451719.1 MULTISPECIES: hypothetical protein [Bacillus] MEETYQYQDDWTDADRQQPFTYGGYGGYPYPRPRPRPRPRPPFYPYPFFYPFFPFYPYYPYYPYPW
96	NZ_CP023665.1	3412300	3412500	-	56673079	CP943_RS17490	WP_020452772.1	66	MULTISPECIES: hypothetical protein	>WP_020452772.1 MULTISPECIES: hypothetical protein [Bacillus] MAPFLIQFMLYFPEDKREYIPSFITLAVFFIIAIVVFRLIIKHSKKEAEKAEKLERELNETIHKRS
97	NZ_CP023665.1	3471540	3471740	-	56673139	CP943_RS17800	WP_020452822.1	66	MULTISPECIES: hypothetical protein	>WP_020452822.1 MULTISPECIES: hypothetical protein [Bacillus] MEKINCRSCGGLTPYDSKVCEACGCEKPLPKAQKITDRIVLTAAGVVGILTIVLILGTIFSYLNII
98	NZ_CP023665.1	2001520	2001723	+	56671671	CP943_RS10290	WP_023857616.1	67	MULTISPECIES: hypothetical protein	>WP_023857616.1 MULTISPECIES: hypothetical protein [Bacillus] MFELDKMINKVNGLKEEHAKGTLKVICGKLDNLKHAGGQYTEKEFVEDIRSMIEDFPELDNKEENNE
99	NZ_CP023665.1	3829831	3830034	+	56674034	CP943_RS22345	WP_158700708.1	67	hypothetical protein	>WP_158700708.1 hypothetical protein [Bacillus paralicheniformis] MIHLNTLFDPSRIVGLIKSHGIKPAIIQTIKGTSPIPIMTYLLSQIPIPNTNKQYASILKTAIISQR
100	NZ_CP023665.1	4135764	4135970	-	56673797	CP943_RS21135	WP_023856949.1	68	MULTISPECIES: hypothetical protein	>WP_023856949.1 MULTISPECIES: hypothetical protein [Bacillus] MTQEKLMLLLYISPLLFAQSIFLFLNAKKKGANAWFWGIWGLIQTPMPLLFYYLFVVRPFHKKRRPSS
101	NZ_CP023665.1	699215	699424	+	56670359	CP943_RS03590	WP_026578971.1	69	MULTISPECIES: hypothetical protein	>WP_026578971.1 MULTISPECIES: hypothetical protein [Bacillus] MVKKIVNRLNSFSLLGTIFFIGSYFTYKFNGVELIGFLYSGIIFLTVLIATTVMLFRQKSKGTNENKQA
102	NZ_CP023665.1	1267723	1267932	+	56670920	CP943_RS06440	WP_023856615.1	69	MULTISPECIES: hypothetical protein	>WP_023856615.1 MULTISPECIES: hypothetical protein [Bacillus] MFFRKMTEKEKKSTEKATKVGFVFYMIALSVSSAYSFFIESGFNISFLILMVGLIVFFTSDFIFNKITG
103	NZ_CP023665.1	1379847	1380056	+	56671030	CP943_RS07005	WP_065643375.1	69	hypothetical protein	>WP_065643375.1 hypothetical protein [Bacillus paralicheniformis] MNVFEQLVESICRKHDQTQAGHDRVIFEQQKELETFDRSAEQFGRQVEAFAENAEKWLEEDVSLPGIYK
104	NZ_CP023665.1	2277956	2278165	+	69284697	CP943_RS22685	WP_224146215.1	69	hypothetical protein	>WP_224146215.1 hypothetical protein [Bacillus paralicheniformis] MLNDWYCFIRQNNIQNATKLREEIKNILPNMKENQNVLLYFNLIDSRFKLMTENYKESGDLLNDIKSIA
105	NZ_CP023665.1	2291925	2292134	-	56671918	CP943_RS11580	WP_020451793.1	69	MULTISPECIES: hypothetical protein	>WP_020451793.1 MULTISPECIES: hypothetical protein [Bacillus] MKSIQAITVHSKQYIVGEPCHPPGFKDEATVMKITEKNKFYGLIRGFVVHFDTKTELHIHTEPVKVYWR
106	NZ_CP023665.1	250153	250365	+	56669939	CP943_RS01450	WP_234026570.1	70	MULTISPECIES: hypothetical protein	>WP_234026570.1 MULTISPECIES: hypothetical protein [Bacillus] MKSAVSLAREMEGNWTVRMKMALNTVIVKHYFNKPLSLENVNALLRKGVSYRRICKHYGVGRKDIASLKG
107	NZ_CP023665.1	1015702	1015914	+	56670669	CP943_RS05160	WP_023856434.1	70	hypothetical protein	>WP_023856434.1 hypothetical protein [Bacillus paralicheniformis] MAQLWHNVGTLFSFKSVNMVLGQTLKKTPPITEGVFHIATQIKPAKNIAKREEHSEPDRASLAALVSGDL
108	NZ_CP023665.1	1038420	1038632	+	56670692	CP943_RS05280	WP_020450662.1	70	MULTISPECIES: hypothetical protein	>WP_020450662.1 MULTISPECIES: hypothetical protein [Bacillus] MTYAAPQVDYSVNPSIEDQAWFLVFVAVLLALGATVVLGAAVWCVVNGNGSFTGSVQWVSGLKVNIECRK
109	NZ_CP023665.1	1953310	1953522	+	56671618	CP943_RS10015	WP_020451502.1	70	MULTISPECIES: hypothetical protein	>WP_020451502.1 MULTISPECIES: hypothetical protein [Bacillus] MKPKIVINHWEETCEDDSCYEYGTSILVNGKELVREASIMTAVQSVLKELGIEADIKEVCENKCCDTYKK
110	NZ_CP023665.1	2548277	2548489	-	56672207	CP943_RS13060	WP_023855949.1	70	MULTISPECIES: hypothetical protein	>WP_023855949.1 MULTISPECIES: hypothetical protein [Bacillus] MMITVKIRHTAETEGTDIGDFTPAELESIVQTIRKYGAWLSPDADADDYKFTFQDAKYNLEQRVFEIIVE
111	NZ_CP023665.1	2557819	2558031	+	56672217	CP943_RS13110	WP_095291534.1	70	hypothetical protein	>WP_095291534.1 YqzH family protein [Bacillus paralicheniformis] MDEKLIEKMLGQALKQYGRNVATDPLSPGEKEILKMALQERRIEEPNEGLHAHIEDVIYDYVTNQGLFSF
112	NZ_CP023665.1	1048340	1048555	+	56674019	CP943_RS22270	WP_125897635.1	71	MULTISPECIES: hypothetical protein	>WP_125897635.1 MULTISPECIES: hypothetical protein [Bacillus] MSHPFSFEFYLPGLLSYPAVKMDTRNARMTPIMINVLIKIPPHPYSLVVICTDAISRTAGALADGTFLLLL
113	NZ_CP023665.1	1167368	1167583	-	56670824	CP943_RS05945	WP_003180249.1	71	MULTISPECIES: hypothetical protein	>WP_003180249.1 MULTISPECIES: hypothetical protein [Bacillus] MEQKQRGGSPIILFYFILFAVFTVFNINKLTNSLCLVREIPEERQDKVFRMINVLILILLISSFIEISFTV
114	NZ_CP023665.1	1541505	1541720	+	56671205	CP943_RS07895	WP_035399921.1	71	MULTISPECIES: hypothetical protein	>WP_035399921.1 MULTISPECIES: hypothetical protein [Bacillus] MYGNGKDMDETTKERNVIMKRKVARNEAALNNKTPAESMHDHQYMTQYDAENGDRGANRNSKQGKQGESHQ
115	NZ_CP023665.1	264837	265055	+	56669957	CP943_RS01540	WP_105980662.1	72	hypothetical protein	>WP_105980662.1 hypothetical protein [Bacillus paralicheniformis] MNEFAHRAIQVIGVIGFVLAAAQISIGWFIGFFCTGLFFMMWKKEGKLNTFNLIVGVLAFLYSFYCLFTQVL
116	NZ_CP023665.1	302141	302359	+	56669996	CP943_RS01740	WP_026580457.1	72	MULTISPECIES: hypothetical protein	>WP_026580457.1 MULTISPECIES: hypothetical protein [Bacillus] MNLSLAVALVISVFLNIFQLAQLKSNNRKNGNWEESTKRPLNPFAAILWTYFAIIILLMLAALVTVIIQLNE
117	NZ_CP023665.1	509398	509616	-	56670172	CP943_RS02640	WP_026580535.1	72	MULTISPECIES: hypothetical protein	>WP_026580535.1 MULTISPECIES: hypothetical protein [Bacillus] MKLIGIGLLLFVSLETFAVMLDVFQGMTLQRAVINSLTFAILEVGEWIMILLFLFIIFLEASANFRKKKKRT
118	NZ_CP023665.1	840811	841029	-	56670490	CP943_RS04260	WP_020450496.1	72	MULTISPECIES: hypothetical protein	>WP_020450496.1 MULTISPECIES: hypothetical protein [Bacillus subtilis group] MGTVDIITILIPVYYFVMAALVIAGIVALTKVVKRYLRNGKLAEEKLRLENEEIKDIKQRLEKIEAILKDVE
119	NZ_CP023665.1	1661794	1662012	-	69284692	CP943_RS22660	WP_223254789.1	72	hypothetical protein	>WP_223254789.1 hypothetical protein [Bacillus paralicheniformis] MAYYDALLDLKKEFPEQVSNMEISHEKGQWKKEVKIFPSLLLVHDKKVLVKIEGKIKDKDKIVKLLQKELKH
120	NZ_CP023665.1	4372928	4373146	-	56674013	CP943_RS22240	WP_025810497.1	72	MULTISPECIES: hypothetical protein	>WP_025810497.1 MULTISPECIES: hypothetical protein [Bacillus] MNSTLSVLKKKLYEQQIRAKGLYTFEEYKDMRNVLQTLRMKFAAYEEWDLYQHATDLMVSMLLKNNWNSRLD
121	NZ_CP023665.1	199295	199516	+	56669878	CP943_RS01145	WP_020449908.1	73	MULTISPECIES: hypothetical protein	>WP_020449908.1 MULTISPECIES: hypothetical protein [Bacillus] MNKLLYRSMEDGFPVEIIYMKESSFSKRAILVKEIKNGYVKAFCFQKQQFRMFKIEAILTVFPYKKRSIAHYA
122	NZ_CP023665.1	1950932	1951153	-	56671614	CP943_RS09990	WP_020451497.1	73	MULTISPECIES: hypothetical protein	>WP_020451497.1 MULTISPECIES: hypothetical protein [Bacillus] MNHFEHAPVYGDDNQRIIGRPFFGGPFGRPFFGPRPFFGPGPFFGGFLGGLTAGALLGPWGYPYPPYPYYPFF
123	NZ_CP023665.1	2008442	2008663	+	56671678	CP943_RS10330	WP_026579662.1	73	MULTISPECIES: hypothetical protein	>WP_026579662.1 MULTISPECIES: hypothetical protein [Bacillus] MYFVSGFVSILLGLLTLFFLQVLSVAFPHYIMDADGNSEASVYFQSSVLFYPVLLLILGVIMIIVHLRTNDKG
124	NZ_CP023665.1	3436408	3436629	+	56673106	CP943_RS17635	WP_230368259.1	73	MULTISPECIES: hypothetical protein	>WP_230368259.1 MULTISPECIES: hypothetical protein [Bacillus] MADGQRILSRLSASRALAHQIMTAAQSNQKNTVLALLRQTGVRSQLDASFDPDGIRIMLISPRSRIFLLLRWS
125	NZ_CP023665.1	989235	989459	-	56670628	CP943_RS04950	WP_020450628.1	74	MULTISPECIES: hypothetical protein	>WP_020450628.1 MULTISPECIES: hypothetical protein [Bacillus] MYVGRDMSELDHTPKNEWKDAELLYFHRAFQQIMPFLNEEGHAEYLEVVKEIQARGGLRRQEADYTHGTTIQYD
126	NZ_CP023665.1	1145109	1145333	+	56670800	CP943_RS05825	WP_020450771.1	74	MULTISPECIES: hypothetical protein	>WP_020450771.1 MULTISPECIES: hypothetical protein [Bacillus] MMCPVCNGILVQTRHCPKCGGEMADAGRATDFFGPYSPYMEFDSFKQTQTVCVHLYTCQDCTYEETVEIETTEA
127	NZ_CP023665.1	1432053	1432277	+	56671098	CP943_RS07355	WP_020451022.1	74	MULTISPECIES: hypothetical protein	>WP_020451022.1 MULTISPECIES: hypothetical protein [Bacillus] MTVSKKTKTEAKKAPLEEREALFYIEDLREHAKELFGIKPEVLDGALFHVKEEQISKLEASQLIQTFLAKEVMN
128	NZ_CP023665.1	2139108	2139332	+	56671811	CP943_RS11020	WP_020451692.1	74	MULTISPECIES: hypothetical protein	>WP_020451692.1 MULTISPECIES: hypothetical protein [Bacillus] MYSKWNSETSYPPSAPHMHTGQSSQQMNQRLKNLEDQMELLIKLMECNNQLLRSIEEQQNRVCAAGGGSVIVRM
129	NZ_CP023665.1	2758515	2758739	-	56672395	CP943_RS14030	WP_020452227.1	74	MULTISPECIES: hypothetical protein	>WP_020452227.1 MULTISPECIES: hypothetical protein [Bacillus] MNSNDTVTMLNEEFVNDQTGEKVEGITIIIDGQFKQVLDIIKAKSDSYENYTEIIRDAVFEGVNSMTMKLRNKE
130	NZ_CP023665.1	3360022	3360246	-	56673012	CP943_RS17145	WP_023856126.1	74	MULTISPECIES: hypothetical protein	>WP_023856126.1 MULTISPECIES: hypothetical protein [Bacillus] MSCLMRLFFILVGVQLMAAASIQFIFDLNAVYHSSDEVFWREFFKELSTRPPFYIMVSGMVLIFIGVCLPRRKR
131	NZ_CP023665.1	484961	485188	+	56670148	CP943_RS02515	WP_020450130.1	75	MULTISPECIES: hypothetical protein	>WP_020450130.1 MULTISPECIES: hypothetical protein [Bacillus] MHTCPRCELKKAETVSKSPVEGAWEVYQCQHCFFTWRSSEPETITNPEKYNPAFKIDPSEVETAVQVPAVPDRKI
132	NZ_CP023665.1	3043626	3043853	+	56672687	CP943_RS15500	WP_228119622.1	75	MULTISPECIES: hypothetical protein	>WP_228119622.1 MULTISPECIES: hypothetical protein [Bacillus] MMYRTFPPYSDPRVRQYPGYFGYPTTYVYNPSAHGPYTYYPYGGVFTTPTLGFGISYPGISVPAVHGFTGGFRED
133	NZ_CP023665.1	3079998	3080225	-	56672723	CP943_RS15685	WP_020452508.1	75	MULTISPECIES: hypothetical protein	>WP_020452508.1 MULTISPECIES: hypothetical protein [Bacillus] MTKNPSNSTQTFIILGWICTGISLLLFPILFGAGGVIFGYLVRSNGKVQHGTIMMIAAIACGLFGVVLGMASAGY
134	NZ_CP023665.1	702684	702914	-	56670365	CP943_RS03620	WP_025811974.1	76	MULTISPECIES: hypothetical protein	>WP_025811974.1 MULTISPECIES: hypothetical protein [Bacillus] MLVLMVKFILLFILCSISFSLFKACVYTAGKKLIDRTAEGSALNWTCSVFIKNGVAMTGDDCFVMAVSAALLAIYI
135	NZ_CP023665.1	3771067	3771297	+	56673443	CP943_RS19330	WP_026580162.1	76	MULTISPECIES: hypothetical protein	>WP_026580162.1 MULTISPECIES: hypothetical protein [Bacillus] MKQKSEVHASSASQLLSLIQEQKRMNQEIVNRLEAINSAPPLSSEIRYLKVLLNSSSTHILNSMIEAAKHISRTER
136	NZ_CP023665.1	3424647	3424880	-	56673092	CP943_RS17560	WP_023856150.1	77	MULTISPECIES: hypothetical protein	>WP_023856150.1 MULTISPECIES: hypothetical protein [Bacillus] MRRKAFISLSLFCSLFAGAFMINREMTREQTPGIGTDEGPQYHGDYTPLQTGAEDQSLTGKERAPFKPREYIRVEKR
137	NZ_CP023665.1	1418023	1418259	-	56671077	CP943_RS07250	WP_048350210.1	78	hypothetical protein	>WP_048350210.1 hypothetical protein [Bacillus paralicheniformis] MTFIILMAGMFLFIQLKKPFRKKIFGYVFLAVYLTVLALYTINSTFVHLISDSLLSILAVIAVAPLLAGFLKPSADSR
138	NZ_CP023665.1	1923461	1923697	+	56671583	CP943_RS09825	WP_105980953.1	78	hypothetical protein	>WP_105980953.1 hypothetical protein [Bacillus paralicheniformis] MEKDMFSALIDEDHDFQEEHYDAKCLDEENWFISDKDRTKKRYYCLFTAIARLDFASIGWGAFGSFADALRKGEENDV
139	NZ_CP023665.1	2917662	2917901	+	69284704	CP943_RS22720	WP_234026545.1	79	MULTISPECIES: hypothetical protein	>WP_234026545.1 MULTISPECIES: hypothetical protein [Bacillus] MRDFNGLKLLGDYAVWCHYKVEHDPLIKRYRHVLDTPVIALPEETGIAASISDIRVIGTKPVRIFNEDGAVFVSDQFVL
140	NZ_CP023665.1	653551	653793	+	56670318	CP943_RS03380	WP_095292663.1	80	hypothetical protein	>WP_095292663.1 hypothetical protein [Bacillus paralicheniformis] MREFAPQVFQTIGIIGFILAFVQIPIGWFIGFFFSGLFFMMLKSNNEKSGTFNVMAGAACFLYSFHCLFTQVLWLNIKQK
141	NZ_CP023665.1	1325117	1325359	-	56670974	CP943_RS06715	WP_020450928.1	80	MULTISPECIES: hypothetical protein	>WP_020450928.1 MULTISPECIES: hypothetical protein [Bacillus] MANDDFFTKMMFGANAPGRHEETETDAEAETVEDAEVSQEADYMHVLNQVGEIMDSLDELKPVFKEIGSMVSALKNKISI
142	NZ_CP023665.1	1641673	1641915	-	56671307	CP943_RS08415	WP_020451230.1	80	MULTISPECIES: hypothetical protein	>WP_020451230.1 MULTISPECIES: hypothetical protein [Bacillus] MKLKDDPDIIRWINSRPRQALFVSVAMVISTMSIGLFKGFDMWTSDFLIFSCLLIGFGLLVGWLQKIYYKKVIFEENSDR
143	NZ_CP023665.1	990702	990947	+	56670631	CP943_RS04965	WP_003179940.1	81	MULTISPECIES: hypothetical protein	>WP_003179940.1 MULTISPECIES: hypothetical protein [Bacillus] MPEFENLVQGQMEIMDKLLYLQAEIERCQKIEKELAALEKKAQLLSIREDISQKRKDLAQIQDLFQKQTEQVIQAYQRIEA
144	NZ_CP023665.1	470236	470484	-	56670135	CP943_RS02450	WP_020450117.1	82	MULTISPECIES: hypothetical protein	>WP_020450117.1 MULTISPECIES: hypothetical protein [Bacillus] MKQENEKKTFSMRMLLNMVGLFVFTGMIVSAYTQAFYLDEHLEICRFVYMTAREWKEFFLFVSGTAIIYFVLANVLSFKKKR
145	NZ_CP023665.1	2832749	2832997	+	56674028	CP943_RS22315	WP_128822602.1	82	MULTISPECIES: hypothetical protein	>WP_128822602.1 MULTISPECIES: hypothetical protein [Bacillus] MAQADVWQIKRESQSNSAALGKIYSEITPLHRLHDFKLVLLNEAGIKRTDLIYGLVIFISFRLLWANKSTRVYSMCIAHDRI
146	NZ_CP023665.1	3839135	3839383	+	56673507	CP943_RS19665	WP_035337816.1	82	hypothetical protein	>WP_035337816.1 hypothetical protein [Bacillus paralicheniformis] MPVIIGKKRHKWLFPKQAARGFRPNIIGVLVENIEEALTEAMKKYITEGIEYRTLIMNHITIMHRSPFIKMCVSPSSTQKTA
147	NZ_CP023665.1	4051072	4051320	+	56673714	CP943_RS20710	WP_023857017.1	82	MULTISPECIES: hypothetical protein	>WP_023857017.1 MULTISPECIES: hypothetical protein [Bacillus] MLSFIVLFGLSFLIVCFIFFTILYFAVNLQKREPKPFQKATEQTVDTVILVPLSWLFTALYICILFILFPIRHFLDFFQQKR
148	NZ_CP023665.1	588547	588798	-	56670243	CP943_RS02995	WP_020450232.1	83	MULTISPECIES: hypothetical protein	>WP_020450232.1 MULTISPECIES: hypothetical protein [Bacillus] MKVFILFYLWIVPLVIGLIFFRVTQRTSFKKRFYPGYIMIGLAAAVFAVCYLIGQPYLGNFFGGTMLFGTLLPFMAAAMKKKK
149	NZ_CP023665.1	1981870	1982121	+	56671648	CP943_RS10170	WP_020451531.1	83	MULTISPECIES: hypothetical protein	>WP_020451531.1 MULTISPECIES: hypothetical protein [Bacillus] MFKNKLKKVAGAVAVAGALLVSGLPASAAPDLTPIRDKYPDAYQFQWNGNNTVTVFFRDSQGKSYHETYTCVTVIQGTCYVYK
150	NZ_CP023665.1	2359947	2360198	+	56671992	CP943_RS11965	WP_020451864.1	83	MULTISPECIES: hypothetical protein	>WP_020451864.1 MULTISPECIES: hypothetical protein [Bacillus] MTAPYLCPNCKTNRTRFNLIEQSPTSVKIDPATGEIMETYSDDELSPFHLPYSGPAIKVQCGACGLIEDEKTFIKLAEFDKRT
151	NZ_CP023665.1	3535391	3535642	+	56673210	CP943_RS18155	WP_023856221.1	83	MULTISPECIES: hypothetical protein	>WP_023856221.1 MULTISPECIES: hypothetical protein [Bacillus] MQQQQGMTTPPPVISTKDHLYLQDMLNWNLLAMKKAHFMADQCQDQSLKTELDRVGQMHHHHYNVILEQLRQNQTQNPSAYMQ
152	NZ_CP023665.1	4167075	4167326	+	56673826	CP943_RS21285	WP_020453451.1	83	MULTISPECIES: hypothetical protein	>WP_020453451.1 MULTISPECIES: hypothetical protein [Bacillus] MIFLLVLLALFILYSFFFDKSNKRSYTKAAPKSRILIRQAAAPTGFLRVIETAPGQPVNRRTSEGMRPNLRLVMSPTDQNEKK
153	NZ_CP023665.1	2341804	2342058	+	56671968	CP943_RS11845	WP_020451839.1	84	MULTISPECIES: hypothetical protein	>WP_020451839.1 MULTISPECIES: hypothetical protein [Bacillus] MDRYYRFCHQNVGRVARITDKGGRVHVGRIVRVSPSKVYIAPMIRRGGRGFAYGYYGGGWGWGPVYGLGLGLIAGVALAGLFFW
154	NZ_CP023665.1	3045679	3045933	+	56672689	CP943_RS15510	WP_020452482.1	84	MULTISPECIES: hypothetical protein	>WP_020452482.1 MULTISPECIES: hypothetical protein [Bacillus] MDDKKELSNVETQRNFLTAEEFPEGAYGAAQGKDKPVENKNTPWKEGQQYYSNFTYEFRNLHQGMPRQYPGAHPTHDEKDQNEE
155	NZ_CP023665.1	256117	256374	+	56669947	CP943_RS01490	WP_105980652.1	85	hypothetical protein	>WP_105980652.1 hypothetical protein [Bacillus paralicheniformis] MGFFNFYNDIILGGALPTLGGIQGWVKDVVAQFAFIVAAFLASKHLMKLRVGGIVFACCVASAVGWAVNHWSTLSGWVGNFIDKL
156	NZ_CP023665.1	745638	745895	-	56670405	CP943_RS03820	WP_105980763.1	85	hypothetical protein	>WP_105980763.1 hypothetical protein [Bacillus paralicheniformis] MSSYEEYYDNYDPYSPEREKERQSRKALRSADTDKTDKTDKTNNTDKTVKTDKSRSSDDDRFKCRKRKCFSDDDDDRFKCRRKKC
157	NZ_CP023665.1	1383091	1383348	+	56671034	CP943_RS07025	WP_003180714.1	85	MULTISPECIES: hypothetical protein	>WP_003180714.1 MULTISPECIES: hypothetical protein [Bacillus] MGYLPPVHHDQYTQYANRSISQKSNYAHIQKTANIPSERAYREVEKREENQTAAFRRVLEKKRKKTLNRRVAEKAESGRYVNESV
158	NZ_CP023665.1	3390829	3391086	-	56673050	CP943_RS17345	WP_105981185.1	85	hypothetical protein	>WP_105981185.1 hypothetical protein [Bacillus paralicheniformis] MKKFSKIVINKDVEVLGEGYYEKFDEEIFVEASDSKVVQSFKKLADQEVIISSIKFEDLGGMFGIYTGLYLICRIQDDEITLEKK
159	NZ_CP023665.1	280193	280453	+	56669972	CP943_RS01620	WP_020449960.1	86	MULTISPECIES: hypothetical protein	>WP_020449960.1 MULTISPECIES: hypothetical protein [Bacillus] MQKHRRRNTTAFTVMSYFTFFAGVFLFGIGLYNADNLQLNEKGYYIAVMILVAVGAILTQKVTRDNAEDNEIIAEQERRQNLSSGE
160	NZ_CP023665.1	747151	747414	+	56670407	CP943_RS03830	WP_033155046.1	87	MULTISPECIES: hypothetical protein	>WP_033155046.1 MULTISPECIES: hypothetical protein [Bacillus] MFNTQQRDKLLELKKKFGSGFIAVFYISILLSVCTFFIEYKYFLIVLFAPTIIVMLINPPFSEKKGVFRFIAGLYLLLLALATYLWL
161	NZ_CP023665.1	246221	246487	-	56669933	CP943_RS01420	WP_039073125.1	88	MULTISPECIES: hypothetical protein	>WP_039073125.1 MULTISPECIES: hypothetical protein [Bacillus] MKQKNLISGLAVAAGVTAYMLKDETRRQKLKSHLQSVKEKIPYFSEKHNVDSFPVEKAGHPSPHDIEDNKMVSEGSMYPVQYYDEKKK
162	NZ_CP023665.1	488375	488641	-	56670155	CP943_RS02555	WP_026580529.1	88	MULTISPECIES: hypothetical protein	>WP_026580529.1 MULTISPECIES: hypothetical protein [Bacillus] MNHGKDFLNKKINEAMIIFTILFPVVGIFFVIMAIWGLAEQAPSEIPFAISVISIFFFIFPIILHIYRKKIWLKKHPELQRKNGKSEE
163	NZ_CP023665.1	701076	701342	-	56670362	CP943_RS03605	WP_105980748.1	88	MULTISPECIES: hypothetical protein	>WP_105980748.1 MULTISPECIES: hypothetical protein [Bacillus] MDSRTAREKEPPLVKAFHYITLAGIFLLIIPSGFNPVYLNGGFILFGLNIGVRSFVLLKKNKKGEFIFTIATCLFLIGYSAVRLYFIS
164	NZ_CP023665.1	3400363	3400629	-	56673063	CP943_RS17410	WP_105981192.1	88	hypothetical protein	>WP_105981192.1 hypothetical protein [Bacillus paralicheniformis] MNLNNFLKADREKAERLFISTRDLISELPAAIEDHDFEGCVEIAATIISHCKDLKRMEHPEQVVRLREIASKFAGRGLNVSAVGRPFQ
165	NZ_CP023665.1	3480601	3480867	-	56673152	CP943_RS17865	WP_023856183.1	88	MULTISPECIES: hypothetical protein	>WP_023856183.1 MULTISPECIES: hypothetical protein [Bacillus] MSSIEGQIMSGDFDDEMNVFSLKKIKQFQTQTSLKENQLRALQQYLRQHEHDEGGQIITLYDQMLVPLSQDDIKALLHDLTKVQSLYH
166	NZ_CP023665.1	4004352	4004618	+	56673667	CP943_RS20470	WP_023857054.1	88	MULTISPECIES: hypothetical protein	>WP_023857054.1 MULTISPECIES: hypothetical protein [Bacillus] MNQAESIKLRAQSMTLKNLIELYRLCRSARHQLYICSRKTMCKIKDLIELEMFRMANRENECLIVIEGKMAQELVRKAQSILSDAQVQ
167	NZ_CP023665.1	4043446	4043712	-	56673708	CP943_RS20680	WP_023857023.1	88	MULTISPECIES: hypothetical protein	>WP_023857023.1 MULTISPECIES: hypothetical protein [Bacillus] MDQNQQKLTAVRLKKIADHIEDTREEYNGLLLQMKKLIGGIEDKTIPDDEEIQKKLQDTYEQMKEYALFVESIETFLRSSARTIKRES
168	NZ_CP023665.1	4256587	4256853	-	56673907	CP943_RS21705	WP_026580364.1	88	MULTISPECIES: hypothetical protein	>WP_026580364.1 MULTISPECIES: hypothetical protein [Bacillus] MAKRILVSSGISVLIFILIGICSFILYAILSHFYMQSFVTGEPSQDEALGWGYLGLLFISFILAILTGIIGGIISFCIYFKKFKKWSS
169	NZ_CP023665.1	4370865	4371131	+	56674010	CP943_RS22225	WP_020453622.1	88	MULTISPECIES: hypothetical protein	>WP_020453622.1 MULTISPECIES: hypothetical protein [Bacillus] METVLIFASVLSPIILALVELVKKTFKVPKNLIPLVSLLIGLLIGAAAYPFTDLELVLRLWSGGLAGLTATGLFEIGKNRNARKKKNP
170	NZ_CP023665.1	1641391	1641660	-	56671306	CP943_RS08410	WP_020451229.1	89	MULTISPECIES: hypothetical protein	>WP_020451229.1 MULTISPECIES: hypothetical protein [Bacillus] MKLITLTEYCMFIFFAGVYLAVTGFTARDVGLYIGIAMIYVFVHIAAKRMLSKRGKEAAEIRILYSVLLIMASVFVTVLFIAVLASLSA
171	NZ_CP023665.1	2514639	2514908	-	56672163	CP943_RS12835	WP_105981056.1	89	hypothetical protein	>WP_105981056.1 hypothetical protein [Bacillus paralicheniformis] MKSKLLLTAVASVAGLSLASAVLMTQTDGMKVAERNVTSAPTQIAERNVTSTPVQIAERNVTSTPVHVAERNVTSAKTSPIHIGERNVT
172	NZ_CP023665.1	1669251	1669523	+	56671336	CP943_RS08570	WP_020451257.1	90	MULTISPECIES: hypothetical protein	>WP_020451257.1 MULTISPECIES: hypothetical protein [Bacillus] MTSEEKKAVFLDLYELYQEGELEEETVIWMKEHEQLFQGQAEEAAVENRTLPGIQKADDRQQLRHIMVFVYSLYGAFLLLSIWMTVWFFF
173	NZ_CP023665.1	4067404	4067676	-	56673728	CP943_RS20785	WP_026580277.1	90	MULTISPECIES: hypothetical protein	>WP_026580277.1 MULTISPECIES: hypothetical protein [Bacillus] MKIIRNQETATTVLENECIVLNLDNGQYFGLEGALKELWIEIENERKDKKDILIKWQSAFDQTEEELSAILNEAIQELTHHKLIEIEDKS
174	NZ_CP023665.1	2331710	2331985	-	56671955	CP943_RS11780	WP_023857365.1	91	MULTISPECIES: hypothetical protein	>WP_023857365.1 MULTISPECIES: hypothetical protein [Bacillus] MADELELFRAYKTLWKNRTMDGEGRQALHRAIDDELNDLRTHPRLRKTKHEKYYQSIRRIVNSQLEPDMKLKLIEWHTERLELLTNEESRE
175	NZ_CP023665.1	1157505	1157783	+	56670813	CP943_RS05890	WP_020450785.1	92	MULTISPECIES: hypothetical protein	>WP_020450785.1 MULTISPECIES: hypothetical protein [Bacillus] MISSENERADAAKEWTMYITVSCLFILIVSVICFFAPAYSLQDLLFRLFDAVIICVLAVNGLYFLRKNKGVACLSFLLCFINMGLLIVMMIH
176	NZ_CP023665.1	1917086	1917364	-	56671575	CP943_RS09770	WP_105980947.1	92	hypothetical protein	>WP_105980947.1 hypothetical protein [Bacillus paralicheniformis] MKLRKVLTGSVLSLGLLVSASPAFAATPSPMVKTNNVVKDEIGVKALHTKYIYHHNINDFKNIERDENGRNWYLKGIEYIDGWYRGEYQANF
177	NZ_CP023665.1	2284734	2285012	+	56671910	CP943_RS11530	WP_039072786.1	92	MULTISPECIES: hypothetical protein	>WP_039072786.1 MULTISPECIES: hypothetical protein [Bacillus] MDFPIIHTNFWDAVIAVPIILIVTQIIKIFLKVPKKYVPSIAIALGLIISVCISHRHSLIAGVFMGGFYGYAAIGSYASLKTTISSYRNKKA
178	NZ_CP023665.1	2334566	2334844	-	56671959	CP943_RS11800	WP_023857367.1	92	MULTISPECIES: hypothetical protein	>WP_023857367.1 MULTISPECIES: hypothetical protein [Bacillus] MNPHMLYSRSGPAGYPARFPLFWGFGAPLVGGLLGGFLGSAIFNYPRPYAYPPPYPGPYGGTPYYGYGSAPGAVPYGGVPGAAPFRGAGPGY
179	NZ_CP023665.1	3091183	3091461	-	56672733	CP943_RS15735	WP_020452517.1	92	MULTISPECIES: hypothetical protein	>WP_020452517.1 MULTISPECIES: hypothetical protein [Bacillus] MMKSFFSAAYCFLMYAFIAYLWLLFITAVLDRTRFLNHSFLEAGVILIGTILFFSLSHHLSASLVKTNINRIGGIAAFCLVMAVHFFIVPLC
180	NZ_CP023665.1	254248	254529	+	56669944	CP943_RS01475	WP_158700700.1	93	MULTISPECIES: hypothetical protein	>WP_158700700.1 MULTISPECIES: hypothetical protein [Bacillus] MLNVNLLNRAYLESELEKIGLLQLAEGFIERLMETVPYYEKGQRILLEIDTFIKDDLKRFVSAVFFILENEDEETEDVNIEFEILRAYDSPPK
181	NZ_CP023665.1	616472	616753	+	56670272	CP943_RS03140	WP_006638778.1	93	MULTISPECIES: hypothetical protein	>WP_006638778.1 MULTISPECIES: hypothetical protein [Bacillus] MSESSATTEILIRLPEALVSELDGVVMQDNGSRNELIYQATKMYLRERKNRQIRESMRRGYMEMAKINLNISSEAQFAEYEAENTVERLVSGG
182	NZ_CP023665.1	807535	807816	+	56670463	CP943_RS04120	WP_020450469.1	93	MULTISPECIES: hypothetical protein	>WP_020450469.1 MULTISPECIES: hypothetical protein [Bacillus] MNTIYILLIGFAILGIQYFLSTRNRTFWGAILPTAYIIFLVALSIHEGKSFASFYLPLIGGLALLLGEWIKGREALKKKQEREMRVMKAMDIK
183	NZ_CP023665.1	3399988	3400269	-	56673062	CP943_RS17405	WP_105981191.1	93	hypothetical protein	>WP_105981191.1 hypothetical protein [Bacillus paralicheniformis] MDPKQIDTVLQLVESALKNGGQIGIDYHCKNEETALQKVQDAAEKLNTKINQRSYDNSFWYTTEINREIQVVAFYPSAYKQKSRLGKGDKNNT
184	NZ_CP023665.1	259314	259598	+	56669950	CP943_RS01505	WP_105980655.1	94	hypothetical protein	>WP_105980655.1 hypothetical protein [Bacillus paralicheniformis] MFLLWAIVGIVLFLIIKKRLQEFIDCRKMSMSDVLECLYVSTVGFGILFCFICWIVAVFFPDYILGAIGAYLLAYGGFLCSAFYGLRGYEEKKK
185	NZ_CP023665.1	706356	706640	-	56670368	CP943_RS03635	WP_020450376.1	94	MULTISPECIES: hypothetical protein	>WP_020450376.1 MULTISPECIES: hypothetical protein [Bacillus] MEMNLFWIGLGLAALGYFIGDGLKNFKNPKGSYSGYPYLVKEGDLHYYLGLSKVETKEMLSKYPDIPKIELNGTTYYPYQHLMDWMLSADLYKQ
186	NZ_CP023665.1	1041815	1042099	+	56670696	CP943_RS05300	WP_011197680.1	94	MULTISPECIES: hypothetical protein	>WP_011197680.1 MULTISPECIES: hypothetical protein [Bacillus] MNTNSLKQGLIFASFSSFLAFPMLAAALLFYHLFSNQTSNDILFNSLSFVMESESAFSFQVKPNFFFIMIGLFIGIFIITAAISSIYQKKKGES
187	NZ_CP023665.1	3660150	3660434	+	56673328	CP943_RS18745	WP_003185302.1	94	MULTISPECIES: hypothetical protein	>WP_003185302.1 MULTISPECIES: hypothetical protein [Bacillus] MLLYYKNECLGEIKGATVEGVWMYGTIIPNENMEKFKDFFKAVVNEDDPFAIEQYSEEWLDDENWFIIDEKQKKVGISLPGIYENDNEINWRWR
188	NZ_CP023665.1	4087619	4087903	-	56673749	CP943_RS20895	WP_048350642.1	94	MULTISPECIES: hypothetical protein	>WP_048350642.1 MULTISPECIES: hypothetical protein [Bacillus] MVFVKVLWTITFLTGAFAGFLWTFSKEKSDEFFSEMTADGSGIFTLFGLIGLLFAKLLKAISPKLPHDWALRCISFILALILLIMSIFIWLLDV
189	NZ_CP023665.1	250423	250710	+	56669940	CP943_RS01455	WP_076792973.1	95	MULTISPECIES: hypothetical protein	>WP_076792973.1 MULTISPECIES: hypothetical protein [Bacillus] MTLIEEFNYHLKKFEDHREPVTLALAQVIQRAMDEKLVEEYQEFYDWFMRCFYDEGKPKEVFRFPVIDEGPILHGGKPRVIIFRDSHISSVPVIH
190	NZ_CP023665.1	1123157	1123444	+	56670778	CP943_RS05715	WP_003180149.1	95	MULTISPECIES: hypothetical protein	>WP_003180149.1 MULTISPECIES: hypothetical protein [Bacillus] MDFSEIALVPLITGLVHTVKLVGIQKRFLPICAIVFGISISLLFTAGDWKEDMMIGTWLGLSSVGFYSGSKNVLKPLSKEEIEHEDLFGSGTRRK
191	NZ_CP023665.1	1394913	1395200	+	56671049	CP943_RS07100	WP_224066935.1	95	MULTISPECIES: hypothetical protein	>WP_224066935.1 MULTISPECIES: hypothetical protein [Bacillus] MMKNNLYVKATTFKIKGKEKLYHAKDKFLQTKETIRRGTKLDRTGPFFSSCIALIIIGYSWGTKAEWLVWLGAASLLSNVLLLFATFFRRNQKSI
192	NZ_CP023665.1	2642016	2642303	+	56672259	CP943_RS13340	WP_020452104.1	95	MULTISPECIES: hypothetical protein	>WP_020452104.1 MULTISPECIES: hypothetical protein [Bacillus] MILESFNDAFLLFEFFTIVLPALTAIGIALILKDCSTGDSWKTKRFEEYHAIQFVSAIDFLIILYHRITVWISKVIRMKASSNDDEDHRSLLLSI
193	NZ_CP023665.1	1111913	1112203	-	56670765	CP943_RS05650	WP_003180123.1	96	MULTISPECIES: hypothetical protein	>WP_003180123.1 MULTISPECIES: hypothetical protein [Bacillus] MELVRIFKEHNVFGWVSVGTAILSLFVLNLAILSDTIAYSYKMLPFAMAAVPLGIIELFIKKGRTGLGFLGVVLNIFILVCVWTIVSIDTNLQLGF
194	NZ_CP023665.1	4047755	4048045	-	56673712	CP943_RS20700	WP_023857019.1	96	MULTISPECIES: hypothetical protein	>WP_023857019.1 MULTISPECIES: hypothetical protein [Bacillus] MKGLISFLKLWTAVLLNAVVPVRETQMKVMAFAGGTYQAADAYQAGGFSEKREESTERMSGCKRAMPGSFTTEPNRAVCQKAVKRVRAGPTLYTGT
195	NZ_CP023665.1	4236320	4236610	-	56673888	CP943_RS21610	WP_051303796.1	96	MULTISPECIES: hypothetical protein	>WP_051303796.1 MULTISPECIES: hypothetical protein [Bacillus] MEKPELSDCICKMKQVLKGDLAREELSDWAGGYVYADDPEIEDERVWNLLILLSGFDLKDSPETYLHDKEELKDWIEEYWNGPIDEVRKCSNERFD
196	NZ_CP023665.1	3383794	3384087	-	56673042	CP943_RS17300	WP_026587168.1	97	MULTISPECIES: hypothetical protein	>WP_026587168.1 MULTISPECIES: hypothetical protein [Bacillus] MSHVTKNYNTDGGDRTVIGGVLEINGGKVIKDGQEVTFGGDGSNIRVTHEMLDDKSVRSNNIGTGSVMEEHLNSTILKRFTDIEAKLKELEGSSGTE
197	NZ_CP023665.1	3516438	3516731	-	56673189	CP943_RS18050	WP_105981206.1	97	hypothetical protein	>WP_105981206.1 hypothetical protein [Bacillus paralicheniformis] MAYPSVNYSANINSYSDIARHKECIANELRYYYSNVVNHARAVTCLTDDHTVVIIHLRIDQYRFYEIVVVAGPDYNKINQIIPRIWSLISRATNICG
198	NZ_CP023665.1	1421451	1421747	+	56671083	CP943_RS07280	WP_020451007.1	98	MULTISPECIES: hypothetical protein	>WP_020451007.1 MULTISPECIES: hypothetical protein [Bacillus subtilis group] MNLEHPMVTHIRTHGYPKEADREQMRRHGGPAGYPQGGRMGKIVISYSSDRFDQWRLGEAGGFIAFTKDGKPVFQFDRKGQYERYLRLNRRRHKEGGR
199	NZ_CP023665.1	2729580	2729876	-	56672361	CP943_RS13860	WP_020452196.1	98	MULTISPECIES: hypothetical protein	>WP_020452196.1 MULTISPECIES: hypothetical protein [Bacillus] MFFNKKQIDKLLDDHTEEEQKETKSKVNTSFIIVFYFSILLSICTVFFDYRYFLIALFGPTILVTFISPPFQTKKGIYRIFSAIYLILLITVTFFWLN
200	NZ_CP023665.1	219788	220108	+	56669901	CP943_RS01260	WP_025810876.1	106	MULTISPECIES: hypothetical protein	>WP_025810876.1 MULTISPECIES: hypothetical protein [Bacillus] MNNETYIEVNRTSQLMNKMRKFSVLIDGVEAGKIKDGGRLRIDLEPGEHEIQVKIDWCVSQTLRFTLDEGEALKFRCGSPVRGWKMFFGLFYVLADPEKYSFIEQE
201	NZ_CP023665.1	236183	236602	+	56669920	CP943_RS01355	WP_023857706.1	139	MULTISPECIES: hypothetical protein	>WP_023857706.1 MULTISPECIES: hypothetical protein [Bacillus] MTLHHFIAADQELPLGSFQDQTKEGLISIAELDQGYEMVKTKFSKPFVYEATGCLHRPGNDIRALFSYINSNMPEGEDIEVYSCWDGEEDREKDDRLDFFIDIKALQLGKHVKLDKKKYIDEITGMFYFEERQLVKIRK
202	NZ_CP023665.1	254540	254863	+	56669945	CP943_RS01480	WP_105980650.1	107	hypothetical protein	>WP_105980650.1 hypothetical protein [Bacillus paralicheniformis] MSAVDDRFRKLGFIVGMPSLVFVRSLSRDCMLVVEGETRKGYSEYRYTFYKTRYLPDGRMTSVKVYMENE SIKRVLPRVASFLSFLENIKQIEKTQKKTTTRKRGLK
203	NZ_CP023665.1	259956	262184	+	56669952	CP943_RS01515	WP_105980657.1	742	hypothetical protein	>WP_105980657.1 hypothetical protein [Bacillus paralicheniformis] MKRKRILIVSTVVLLFLTFATALSVFSADGDVTTQPKIEKAGGVELEIKRFPISRYQANNEDSDDWLKGPFIGFTNVLFSTAGNVVRVVDMGMDILNNLQPIDEFANSITNVSKRVYTTLKDNFGEALFIFAVGYIFYLFAVRGSAKEAMRRSILFLVILIIGGWYMSNAGYVMKALNALSVEAQGKLLNAGNGLLGIAKDEGRFVEASNIEKGKEMEGTIAVMRNLYFDLALKKPYMIVNFGEANEKKINEKGSDDKGGLNRVDKLLSYKLSSDGEKARLEYIKSTEIDKYNNEALTSGNAYNQFGESIIGLFASIALGIPFLGLSFLNFLL…
204	NZ_CP023665.1	263202	263708	+	56669954	CP943_RS01525	WP_105980659.1	168	hypothetical protein	>WP_105980659.1 hypothetical protein [Bacillus paralicheniformis] MKTHVLWASVCVLVLIITSFFVHRQQDLKLKNLTEKNQILEENIKKMNQKEIDGSASKNKAFFEAFFNYSDADKRFDDVKKLTTKKGLDYAFPSRTNENHTVSVQSELLSLESYSKNIDESSELFLNVVELATTANSVTTNQTLIVQTTMKKVNNEWLVDDVQIKGNG
205	NZ_CP023665.1	264177	264725	-	56669956	CP943_RS01535	WP_105980661.1	182	hypothetical protein	>WP_105980661.1 hypothetical protein [Bacillus paralicheniformis] MKKKLLVPLLSASLLIGIASPFASAKTASASEQPAKEVNREPEVVLVKTINYDDDGNPIVLPGESILRVNETANVQDVDVASSWKYWRTNKYSNKIVWTSISSASAALGVYLKIPHLSLAGIVGNWIIANKNSWIYYTDKKYTRMSGYVFQIKHNVTWYKDKKRKKKLQTQVYITNDYGGMK
206	NZ_CP023665.1	270584	271114	+	56669962	CP943_RS01570	WP_043054026.1	176	MULTISPECIES: hypothetical protein	>WP_043054026.1 MULTISPECIES: hypothetical protein [Bacillus] MKKLVTFLAAFTLLFILSMNSVSEANAEESKSLGTIKKMNDSELELTFYHSEVVMNSNGDVTVIDSITGKKETLPSRTVDKNDNPVDLEYEKNDNGLLVKVIKRNSSNMFRTQSVAKCVLGTSGGAVTGAGTGGLAGAAVGTVTIPIVGTVSAGLVGTIVGGVGGGLTGAAASCFD
207	NZ_CP023665.1	277269	277583	-	56669969	CP943_RS01605	WP_234026552.1	104	hypothetical protein	>WP_234026552.1 hypothetical protein [Bacillus paralicheniformis] MFEAIILFILGVSVLAAGFLSLKRELSTESVSISSTDEAKSELKKMLDDHGWFYLTGIALFMQFIFRGFHFTFEHFFYAFIISSGIQSIFTYLIKRIWAIRYAR
208	NZ_CP023665.1	280485	280940	-	56669973	CP943_RS01625	WP_026580443.1	151	MULTISPECIES: hypothetical protein	>WP_026580443.1 MULTISPECIES: hypothetical protein [Bacillus] MQTDKQLFEETKQKAEAILSSKTENDEELMAYLEKQDLSTLNRLKVYFSGPTLKISHVIKASLYSSFTASIITAIFSGQVVSISYDIEHNFFPLILTILLLASSIWVFGTITKSQRNKDQNFLHFRKKANHTKIIGMIDFVLENKHKNISN
209	NZ_CP023665.1	281004	281450	-	56669974	CP943_RS01630	WP_023857730.1	148	MULTISPECIES: hypothetical protein	>WP_023857730.1 MULTISPECIES: hypothetical protein [Bacillus] MRNEKQLFQKAEHTAKLLESHKSDEELLTYLANQESVTLNQLKIYYSNPSFTLTYLIKGIFFSSMTAVIMAAFLSGQISSLNHGLSRLFSFFFMFYLIFSFLWIVKMLISSRKGPMQTILHFQKRAEYSRITGMIDFILDERFKKEFD
210	NZ_CP023665.1	281487	281954	-	56669975	CP943_RS01635	WP_023857731.1	155	MULTISPECIES: hypothetical protein	>WP_023857731.1 MULTISPECIES: hypothetical protein [Bacillus] MNTDKQVFIETQKTAKTLKTYRDKSDEELLAFLAKQDSLTLNQLKVYYSDPSFALHYFISAAFFSIILASFITAILSGQADSIFPFISGISILILAVIFTGCLFWVLKQLVILKKKPIQFITHFSKKAEFARIVKMIDYVLQQKYKKALKNIPNQ
211	NZ_CP023665.1	293482	294369	+	56669987	CP943_RS01695	WP_025810847.1	295	MULTISPECIES: hypothetical protein	>WP_025810847.1 MULTISPECIES: hypothetical protein [Bacillus] MQIRMTEYHVPNPESGPYGIAVCANGRIWFTEQKGNRIGMLTESGDITEYTIPTKSAGASIITPGISGELWFTEYKAGKIGKMTPQGEITEYALPLGTAPFGIAVGCDDAMWYTDMAGHQIGRLSSSGEITEYKLPKPGAFPSFITRGADDALWFTQNQSGSIGRITADGDISEYPLPGEQSGPVGITAGPDGALWFTEINENQIGRIAVSGKISEYPLPTANARPHAITAGGDGALWFTEWGAGQIGRITVNGDITEYPIPTAESEPHGIAAGPAQSIWFAEECGRIGKISILD
212	NZ_CP023665.1	324597	326519	+	56670016	CP943_RS01840	WP_025810827.1	640	hypothetical protein	>WP_025810827.1 hypothetical protein [Bacillus paralicheniformis] MATKNIFENENVKLRIINLEYSYKNRFASNNPNEVKKAKDNFEADVRRIYKEETNHELPENIEIFTSKEILEHSKDKTISQSGYDGTAIHIKDKTKHIDQLHIISEGSADNEDWKYNFFGLFLGMDNRQYKATREFSRASKRKVGNSKELKTYAMGHSLANNNQVLVQLVNGEFDEVYGVNGAQISVDHLLLIDKKMARELRKKYQVNDLSTIPKNKLKKAIIKYYNDKGVTANITQRISSDDPLYGVSGKADFITFGDVKMTNTHPDIKGFRSVIDHIPDEDVSKLKGYFQKYAADYRKGGIQGFAMEAIGVDMDFLNGIMNEEGTAQQIAY…
213	NZ_CP023665.1	326535	326888	+	56670017	CP943_RS01845	WP_020450003.1	117	MULTISPECIES: hypothetical protein	>WP_020450003.1 MULTISPECIES: hypothetical protein [Bacillus] MVKPLLEETETVSATYMFLSSISAKDKAARLNAPLKSVLKELKEFDKVLKSEIEGQKGMMITKIKEELDHKSENRKTVITRMKSDNEQFANSYHDMIETLRKQNVTLYYKKNKPLDQ
214	NZ_CP023665.1	419982	420308	-	69284675	CP943_RS22575	WP_223254833.1	108	MULTISPECIES: hypothetical protein	>WP_223254833.1 MULTISPECIES: hypothetical protein [Bacillus] MSDKAGNPVEKNGREDLYISLVNQEAHRLKGCLYCFENGEYQKFMVSQSKAQAFSYELAPETVQTYPINLKILGSHYFRFLSTSIPPEGPYRDVPFPARMIYYSKLYT
215	NZ_CP023665.1	485694	486140	-	56670150	CP943_RS02525	WP_105980699.1	148	hypothetical protein	>WP_105980699.1 hypothetical protein [Bacillus paralicheniformis] MSKFLQKPRNKAILSVYLFFVCGSVLSSVLNPVMSLGEKLFILCFNIFSATLFAFLIYVLLNKLMKDEDRKHPADPEKNGINQVIWKKYKKPLILFVYFGGVFSVCAVIIPMPIYTVVEKLVILSIAIIIITIGCILAYKVTNKMLQK
216	NZ_CP023665.1	486166	486510	-	56670151	CP943_RS02530	WP_224066812.1	114	MULTISPECIES: hypothetical protein	>WP_224066812.1 MULTISPECIES: hypothetical protein [Bacillus] MMSPETFVEYTEYFIAGMLAAHFAYSLGFLIIASHMIIEYEKMVFLKPEKWSHKITNTFVFLLVGTGYFVYKRLLKYNWFLRKLYFALYLLGRGILSIIIFYIFSFLIHLIFSV
217	NZ_CP023665.1	486578	487024	-	56670152	CP943_RS02535	WP_105980700.1	148	hypothetical protein	>WP_105980700.1 hypothetical protein [Bacillus paralicheniformis] MKGRNKIILSVYSLLAAIIILTGLVKPSMNWKEKLAVIGFMFVSISLFAFITYVFINKPKKDQNAPRCNIVAKIFWKKYRKPFMLSFYFVGILIVGTSVFFMPELSLAWKSGVFAILFAVISGGFFTVYQTANQMLNRSCLERMPDEE
218	NZ_CP023665.1	487045	487725	-	56670153	CP943_RS02540	WP_105980701.1	226	hypothetical protein	>WP_105980701.1 hypothetical protein [Bacillus paralicheniformis] MFKLKDTILYKDLPTNIQSHLTAPISRETKWGMACFIVLMLDILSILPVLVNKVDFFIFAAVPVAILINIWMIIMNTKSMTGYHYHLQYVRFMGVSFSGMSYCQLITAQKMMVSAIGFHVPLISLSLFIYAAVIFLIIRYYLVVFPDSKKGKRETAAPTRMLLAAVPAGGFVISHAVLRVSESAVYLLMSTVYLLMACLFSMMGVKFIHK YFFIKANQDIIRQHRI
219	NZ_CP023665.1	537995	538486	+	56670198	CP943_RS02770	WP_026580557.1	163	MULTISPECIES: hypothetical protein	>WP_026580557.1 MULTISPECIES: hypothetical protein [Bacillus] MKKRTVLLFLAILVAGCASAQENDEQTKWVNSEQEAIEDGIRYENITKDDIIDKIDLNGEQVVVFRFGDSEGEGICLAHIKRENGKYQWYRDLNYAIVKSDHPKTESAEASSPFTTPKGSKYTLYTGDAARLNGTFETDDGLHLEAVVDQKTGMYYQIVRDSN
220	NZ_CP023665.1	602984	603322	+	56670258	CP943_RS03070	WP_023857878.1	112	MULTISPECIES: hypothetical protein	>WP_023857878.1 MULTISPECIES: hypothetical protein [Bacillus] MKKFITALPIVLLLSFSFVSFAFNFDHLVYFRLALGLFSLAGLFLLYKLKNGVRFFMAYLYGSWVVLAGIAAYEEPLFSDFFFGGLTITMGYLTYMLIYLGMKVDRRGGQAV
221	NZ_CP023665.1	631682	632302	+	56670296	CP943_RS03260	WP_105980731.1	206	hypothetical protein	>WP_105980731.1 hypothetical protein [Bacillus paralicheniformis] MAKKFIKTIVSLLVFVLVMGVLSPLSQAIEEGKEDESIDFNSTLNTLNEIFPKNIDGISSISTINKKDIQSLDNEKFEKEFDFLIEDPVFQQLEQVLAKQEIKDAEIKPMWVPIVATALRVLISKVGRSGMKKGWAIARPYVEKALKAPSKYKIDGPGGGGRIIQVRLKSTGKPIFRLDYYPVKTGGPYKLHYHVPPNMKKHHIIF
222	NZ_CP023665.1	648557	649102	-	56670312	CP943_RS03350	WP_039073246.1	181	MULTISPECIES: hypothetical protein	>WP_039073246.1 MULTISPECIES: hypothetical protein [Bacillus] MNDLVYETIDKYYRNNNESDYLTKCREQFVIPEAIKKFSENNNMIITDVNFGEIWPSSKLIFEYEDYTKGEFEVTYSTILMLSKLAPLFYLQHEFQVENRDVNRTVPTLEGFDTQPYNTKQQEFEDCVKEYFSKKEFIELSYSEMNEVVCGLDFKKDVTFFGSQVTVENALFFDLLEICPD
223	NZ_CP023665.1	741468	742034	-	56670399	CP943_RS03790	WP_105980762.1	188	hypothetical protein	>WP_105980762.1 hypothetical protein [Bacillus paralicheniformis] MKKKSAPLILIMALSLLLPFAQAEATGSNGTSGTKASSSSANNSSLKTRPGSVNQRMRSYMNQSASRQYLNKSSQFNAIQRTLPSNALYKGSIKRTLNQNPAGSAFLNYYFPYWMIFHAGGYTAEQKSMLRTAGIKEKALSERKEKRYWLLIEDQNGKEHAVLVSKKQYDNIQKGDRVEVRRKQITKK
224	NZ_CP023665.1	742031	742432	-	56670400	CP943_RS03795	WP_206761178.1	133	MULTISPECIES: hypothetical protein	>WP_206761178.1 MULTISPECIES: hypothetical protein [Bacillus] MITVKKSKLISLSAAAMLFAVPLSGCSSSASDRSQEVSEDHSIQKYDLVWFDYVNDSESDKAPLLKASYVKNGKEKTETFKKYVENVENVEQPYIKIRDHEAFIYRPPYIKYDQEPLEGVVKDKVEQKSSDEQ
225	NZ_CP023665.1	742625	743005	+	56670401	CP943_RS03800	WP_020450411.1	126	MULTISPECIES: hypothetical protein	>WP_020450411.1 MULTISPECIES: hypothetical protein [Bacillus] MKKILFSVFVLAGSLLLAFNFAGEASAKTKKVSGYITWYNGVGKVGADGKRLGHWDCATKMGFDVPRKGTKIRAYSKAKPKKVITVYKYDVGRMPGAVLDVSPKAFRALGFPTSKGKVAGHYTYKK
226	NZ_CP023665.1	745213	745521	-	56670404	CP943_RS03815	WP_020450414.1	102	MULTISPECIES: hypothetical protein	>WP_020450414.1 MULTISPECIES: hypothetical protein [Bacillus] MNMSVPKDAVCSMPHDHQRSLHDLCRKYMHYHVVLKMKDGRSVHGILEGVNRQEASLLIPEDVTDERQFYGGYGYPRRRFRRFRSRIFPFVIIAALYPFPYY
227	NZ_CP023665.1	760955	761419	+	56674018	CP943_RS22265	WP_158700702.1	154	hypothetical protein	>WP_158700702.1 hypothetical protein [Bacillus paralicheniformis] MALSGVLCLFAVLAFIFYFAATVNFTSVSLENESIAGLKIGDSVKNDHRFVKSGTGVVEYKAKNMSGVKAEIDKQEKIVLLFNISSAQTVTIAKGIKINDTLQTVVYGKEYKELWFVEGYETGIQYQDKKRDVVLEFYFNDHKVHLIELKKTGN
228	NZ_CP023665.1	763310	764065	+	56670420	CP943_RS03900	WP_105980768.1	251	hypothetical protein	>WP_105980768.1 hypothetical protein [Bacillus paralicheniformis] MIEEHHKRNEDDIEEPASRMSRNSRKKAKKSKETNPSAAKVKSVMESVIAALFRYFSFVLDILKSPVRSALDFDRSYFKYSVISMTLLAVFFSLGNFYQLLAGRGRILGFGVSVPFLEVFLVVFIYCMAFMFWMAASSWVVSNFMLRYKVSFFDITAKYGSLLVPFIVAAALWMIFAIINFTAATVILSIVIFMGLTFGTFTLIQSIYEKSEKARFDLMYCVFTVFLLELVFVAATWKLVGGYLLSSLIPV
229	NZ_CP023665.1	818087	819352	+	56670472	CP943_RS04165	WP_105980784.1	421	hypothetical protein	>WP_105980784.1 hypothetical protein [Bacillus paralicheniformis] MTNITQRMRVNLQEQNGISVQPVFPSPWFHKKEVPMFGGFVRTRDIKLWENNDRLDIHIHQFKRINGRNPDDTEILDIMLSRMSLPGVTERDQFKIMDLARSIANNGVRRPPIIDLDGTLLDGNRRVSACYFILNSNEFTSEQKAKVEYIYVWQLTEHATEDDKRHVVVSMNFEKDHKQDWPEYVKANKIYEDWLAMLALEPHASVRRQRELKRELSLRYALGPDIKYVNRYIRMIEAAEDFEAFHIEDGERDEYEVKHKSSDYFQYFDELTKGPVRSTLDQDETFRNLVYDLLLEDKFTNWKQIRVLPKVANNEDARKLLRQARGEDDVEEA…
230	NZ_CP023665.1	841660	842430	+	56670492	CP943_RS04270	WP_020450498.1	256	MULTISPECIES: hypothetical protein	>WP_020450498.1 MULTISPECIES: hypothetical protein [Bacillus subtilis group] MKRFLLLVSFLLVFPTAYGTAIAKEKTQGLSLEEKIFEIDKSDDLSKQVKKQKFIQALEDSTDEEKTEYLEEVGERVQNTLSEVDVQLGENKEIDLGMGTTIELESSDVIESTEDELVKTSGYDFSKGNVLEKKYGARRFTCRVSVKSLGITLGSLVLRNHYTVGNFGLKMRYASDSGTSGIDPLMIITSSSTSVPDGKAEKVGYDMNARGSYKWKLGISGIYASFTSEIYSTIKLHKLNKKKKFAVVYQNYKFTE
231	NZ_CP023665.1	922455	922805	+	56670560	CP943_RS04610	WP_020450568.1	116	MULTISPECIES: hypothetical protein	>WP_020450568.1 MULTISPECIES: hypothetical protein [Bacillus] MKNDRVFIRNILLGASVGAVMSLLHKPTREACGAKLDACKNKVRLYRANPGMFTECVKEKMDEAKKLTASISDDLSFLNQQMKELKETTPKVIGLIEETRDHFTAKSKGRTEPEKE
232	NZ_CP023665.1	931546	932142	-	56670570	CP943_RS04660	WP_105980813.1	198	hypothetical protein	>WP_105980813.1 hypothetical protein [Bacillus paralicheniformis] MKVHTGLVGIFLIVLGLLISAENHQSVSAADALSNFFRLPVRNLVVLICMLMLIIGFIMAWRHYYEVPWIRFKLFLFIIGISVFYPLVTEQLLLFQKWNAQGDDAVEYMKKRSTCSYQSDMEEGNMDCEVKVNNYGKKTERIQLIPDITSEFDFQPEELELSPHSQETYSVTFKAPGNEDVYESGIEEEPRMKVEVVK
233	NZ_CP023665.1	935620	936090	+	56670574	CP943_RS04680	WP_026580647.1	156	MULTISPECIES: hypothetical protein	>WP_026580647.1 MULTISPECIES: hypothetical protein [Bacillus] MKRLCIIPCGAKKIWDVDPGIGPSAAKDVYLSPFHRACGAYAQTFFADWVILSAKHGFLKPEDIVPENYDVTFGMDHPEIMADDELKAQGERKNLMDYDEIVMLGGKKYRPVLRNVFGSRQQITYPLAGYRGIGYMLQALKRAVDEGRELSEPENN
234	NZ_CP023665.1	936788	937354	+	56670576	CP943_RS04690	WP_231006255.1	188	MULTISPECIES: hypothetical protein	>WP_231006255.1 MULTISPECIES: hypothetical protein [Bacillus] MMKDKERSVFKDLLPLYHEGLLSKESAEWIEEAAENDEELQKLLKMTEAELPKEHIESTVHESQMFKKINRKLSLYQLMFTAISFFLAIHTSLLNESFGFILWYAVLGLAVYLFYRDMKLVILLSFAPIFIWGMGDILAGWDAADGTGVVEHLLYSVFGAFMLAVIHCFFAAAGMMIGWLFLKLKESS
235	NZ_CP023665.1	937356	938081	+	56670577	CP943_RS04695	WP_025810228.1	241	MULTISPECIES: hypothetical protein	>WP_025810228.1 MULTISPECIES: hypothetical protein [Bacillus] MMKKKILYSVLIVLLVSFVLAAYNAFNGNPVSKKLSQTALEHYLTDRYPEKDLRIDSGLYNFKFSEYVFEVTDTGDQKRKDPYLFSLRGFVQPEVHTDGIYEENLNEPLMERLGEEAGKEIKTFLSKNINHLKDVDVHVEVLKGKLKEDAKWEKSLRLERPMEIHILLDAANADRKDVYKTAQKIQRLLNEERYDYESVTINANIFEGEDIKDDETGYVKYSTFFEKNTDTRLKDVEELNE
236	NZ_CP023665.1	941910	942650	+	56670582	CP943_RS04720	WP_075213735.1	246	MULTISPECIES: hypothetical protein	>WP_075213735.1 MULTISPECIES: hypothetical protein [Bacillus subtilis group] MPNVRILLHNGRDARIWKELIELKKKAIITGLSLLILVTGCYVYNLFYGNPFSRALAEHKLSAYLQEAHAGETLNMKGSSYNFKFAEYLFRVSDERNDEYIFSVKGGLHPAVTNDGIKEARQEKTRARISKEASNEIKRELEKKLKNVIDVQVSLSGSYDVNTNWKKLKQTEPIAVTVTLNSGRDGRRQVYDQAKVVKKLLSGYHYENIEIDSMGLDGEDRPGYVKYSVHVLKDRAIAIEDVEKTL
237	NZ_CP023665.1	1012588	1013340	+	56670665	CP943_RS05140	WP_234026559.1	250	hypothetical protein	>WP_234026559.1 MULTISPECIES: hypothetical protein [Bacillus] MDKNLNELLSYFEVPSYVISLVGLALYLIRILHPITLFSSNVVEQKLFSKERLFFVVVCKYFAYGFYFVILFFCLSISFNDSFGWTYNEVRNNVSLIFIALIIMFSLIANDIRNTENVLFKVRSNKIIKLLVFLLYLIALLTFYINTALLIVFSEYENSRWLIFALLILFLICAAIPFISIPVIKFINGSTKKAVYIKDKNNEKWFILHPINKEIVLLGDNSDPKRCERTMFKKIEDIYNEPIRLKIEDN
238	NZ_CP023665.1	1014805	1015701	+	56670668	CP943_RS05155	WP_023856435.1	298	hypothetical protein	>WP_023856435.1 hypothetical protein [Bacillus paralicheniformis] MTRTGVRKDAAKKENTKRAFVITPIGDDNTDIRRSAEGFIDAVIVPVLNDLGFETNVAHRMTDGGSITNQLINSILEDDLVIANLTGLNPNVMYEVAVRHAVRKPIVHVCENGTKLPFDLGAERTIFFTNDMKGVIEVKGIFKKYVESALKEKDPDNPIYRASSESMILQHVKDENPDQFIVLKRINDIERLLKSLNLSESLNESRRKSNFYGFETFEFEVSAVSESLLFDVLLGTMNDLGIDTKLSNPMVTSYINDEGKETYKVIIELPLYMSSERFLKKFNENGMGLLENIKKVKK
239	NZ_CP023665.1	1016090	1016695	+	56670670	CP943_RS05165	WP_105980826.1	201	hypothetical protein	>WP_105980826.1 hypothetical protein [Bacillus paralicheniformis] MRNFYKDIVFFFIIFSLLLGDIILFSNLINEFFVDSETIIAGIIGFVGAILGGAITYVGVRLQLSHRDKEIFLSTATERIINLSSLEDRYLSYNRRALNYAQQIHMDPERRNYQTGELVKEIIESIQQDRRTLIEEMGYSEYKEIMKIIGSIYRKIDGYIGKRPMTEDEAKEGIDEIQRLFKIISSYKSLILRKYENYTRH
240	NZ_CP023665.1	1016882	1017349	+	56670671	CP943_RS05170	WP_105980827.1	155	hypothetical protein	>WP_105980827.1 hypothetical protein [Bacillus paralicheniformis] MNMDIIRFIAVPLIVVILSASFSSYLTTNAERKRRIFDKKYDLYLEFVQVVSSAVIVNQALLKHQFKNLSEDQLPHELQKEKAKLAENYLSIKMKVSLICNKEIIELFKDIADFNLQDPKKLDAFYRIMLLMRNELGLSNDSVITHDFDLLLNGK
241	NZ_CP023665.1	1017401	1018027	+	56670672	CP943_RS05175	WP_105980828.1	208	hypothetical protein	>WP_105980828.1 hypothetical protein [Bacillus paralicheniformis] MKVVDWVVLLLPITLTGILGLFFNAKLEKQKHILQKKIQDFSLYNEKKHLCYSELYKLMKEAQGHIFGLKGLISRPSFDDYNKDDIESYLNEIGTTQKVVNDVVDLWEVNKDKAIKKVREYEKLRDLTLAKNALIKAKNFWLLNELYFIEYTSDKLDEYFQKLNELYINYSHIEEVSRIENREIKKEVEDKFNVLKARMKDELSSFIE
242	NZ_CP023665.1	1037209	1037667	-	56670690	CP943_RS05270	WP_025811868.1	152	MULTISPECIES: hypothetical protein	>WP_025811868.1 MULTISPECIES: hypothetical protein [Bacillus] MNMITRTFFHILLFGLACWTFITFFHTSEQIAKSLKTNASELHFVFNLIPILLFGLALSIYTYLEKKSGSRKQRFMLVPDEFKEQDEREQMITAKACRTSYIVLYVAMPVAALLLIFYPFFQARIPYFPIIVIFVLIIIQHLSYMFSFYKNR
243	NZ_CP023665.1	1039451	1040920	+	56670694	CP943_RS05290	WP_025811867.1	489	MULTISPECIES: hypothetical protein	>WP_025811867.1 MULTISPECIES: hypothetical protein [Bacillus] MRILIKSFEISKMMLKMWQKEMGKLLNTGTKKMIAALFLILAIAMGSIIGYSFTGMFLSAFLNGEIRSLGLFVISMFMNVSIFTFVFFILFKVRTPEQNSFSMQLSWFPLTAFERSLGYFIPFAGAVSFLVLFIMSILLIPNFVASGVGFWFAFTFFALLFVQIIFFFSLLNLVYNLVYMVILKFGFPLQKFFSMFVLVVLAVIYGFTSFDLGKIQNAYSTFDYNLTYFAAPLFLVLNGQSAGAGIILVVLILAAAVTASFMSLNVVPILTEKKSSKLFSFIKIPSSKPLSLAVKEIKSQARNEENILNFIFLLLALCFLKYKFQFGFTGESYLVLG…
244	NZ_CP023665.1	1042801	1043430	-	56670699	CP943_RS05315	WP_105980832.1	209	hypothetical protein	>WP_105980832.1 hypothetical protein [Bacillus paralicheniformis] MELRLQIAPAILNRIPSFKVGAVLYQDIEITGSPQMLKGRLRLFQESLFFDYADRSPEDEMAVKEWHDAFRELNPSYSGRESGLERMLKDIKEQRFVEPENSAIDLSRFFSLKYLIPVHIYDARKLNGPIKIEPGSPGEIITFSDDAGAFGTITGNLSLHHAGTDTKDALQLVFFRPSLSIEESRRLLESLTKMFEQIHGGEHISTVFP
245	NZ_CP023665.1	1047601	1048302	+	56670705	CP943_RS05345	WP_039072542.1	233	MULTISPECIES: hypothetical protein	>WP_039072542.1 MULTISPECIES: hypothetical protein [Bacillus] MKKHDLKIHGSGNAGGGSFHHVLIRGEGTITGNIECEKFSTHGTSELSGDATIKSFSVHGETEIRGRLKADKARVYGTVDVSEDADISDAAVKGIINIGGNMAAETCDVKGALNVRGDCEAEDFTLTGSLDVKGLLNAGAIDIGLKFGNSSIGDIGGTHIKIVKKRGLLFNRNGGFLSAGTIEGDDIYLENTEARMVRGNRVHIGPGCKIEKVEYKSSCRVSPKSEVNEDQQE
246	NZ_CP023665.1	1055057	1055389	+	56670711	CP943_RS05375	WP_026580008.1	110	MULTISPECIES: hypothetical protein	>WP_026580008.1 MULTISPECIES: hypothetical protein [Bacillus] MTIILTIIAAVLVIIGLVVFNVRSASSQDKPEHEDNAAAEAGIPHVQEEEAPEQVEADQQDPFEMNDQTYRAILQKLQHPKEEKNHSEKTEMDDMDYRKALKSMKKREQD
247	NZ_CP023665.1	1055523	1056290	+	56670712	CP943_RS05380	WP_051303785.1	255	MULTISPECIES: hypothetical protein	>WP_051303785.1 MULTISPECIES: hypothetical protein [Bacillus] MRSFSGLFKKDFLMARFWFLVWMLCMICAIIASFWFAHYTGESMALFGALVTILLFHSLFCPLMILAQLRLEGKTQLWLYNPNNSALLLVSKLASAAVYQLISHAVLFIFGLVVRSVLLSSSAGLFSVSDLLLVNIAVFLGSISFSTWVMFLWTVYEALRKYPAIKKIRWIIPLLIYSAYGLIEALFIESGLFQELQKLWSISLKAEFKLHYEHSGWTVTFSQVDLPGVLLVYYTVLGVCLFYLSCKLLNRRVEV
248	NZ_CP023665.1	1064130	1064471	-	56670722	CP943_RS05430	WP_025811843.1	113	MULTISPECIES: hypothetical protein	>WP_025811843.1 MULTISPECIES: hypothetical protein [Bacillus] MFRRRSGIHPAVLVLGSAALTAAFSPEIRKRLTGMFAKGMGGRQQGNGRNQMMMNPADMIKQAFNSGGQSQEHRQSGHTANDQHQSSHMTAPVNVMNDQTANQTMFDNDQSYS
249	NZ_CP023665.1	1067137	1068030	+	56670725	CP943_RS05445	WP_105980834.1	297	hypothetical protein	>WP_105980834.1 hypothetical protein [Bacillus paralicheniformis] MTGEMKAAFILIMAGTLSALLLAVFVVFSQESPEAAVLSGKKEKLKESLKMLKYESVSIYYAKEDRTILELTKETLRDAADLNRELFASPLQDSVDLIFFSNRDDMESFSKLKDITGFYSNDMRMIGLLLEEKKHLNSSEGFAVFLYKRVLIHEYTHYAFHVKLRELNADPAAYPLWFHEGVAEWVSAHDAVEIRTLPSAVPLSKLKTDRQWQKARFGYETDIYLQSYYLIEELVEKKGRDVILDMIEETAARGSFEDGFKAAVGQSLLGFEKEFKRKYEAKKTARNVSLPCRFHYQ
250	NZ_CP023665.1	1092938	1093396	+	56670745	CP943_RS05550	WP_025811820.1	152	MULTISPECIES: hypothetical protein	>WP_025811820.1 MULTISPECIES: hypothetical protein [Bacillus] MKWIKTGDEYVEKKMTQFFSEAGTIVAAILFLDMIIRGLILGRPASEYIVSAIGFAVYAGWILFRYLLSGFEYPEIAGQAAYRKKRKEITALSLASGIIFAILVLIFTGIPKHPGSWFDFIMMVMLFVFFHFLINFISLRKSFRKNQDLLDD
251	NZ_CP023665.1	1196102	1196548	-	56670853	CP943_RS06095	WP_020450817.1	148	MULTISPECIES: hypothetical protein	>WP_020450817.1 MULTISPECIES: hypothetical protein [Bacillus] MGIILFFGILSITVFYVFHLMAEPFDSRNAEEIILKQADDSEKTVSIKDRHNIGVLLDTFNKGKRMKEKSAHSLPSPAYHGYISMTDTHRVHFTVWLKKDEAVILKEEEGTYFVLRQKEKDALLRELQKRDAAGVPFNVSRLICQNVF
252	NZ_CP023665.1	1214305	1214670	-	56670872	CP943_RS06190	WP_105980857.1	121	MULTISPECIES: hypothetical protein	>WP_105980857.1 MULTISPECIES: hypothetical protein [Bacillus] MTRIPAEARDMIEKAIYLPMTVSILNRDMKIIQQGPFKLKDPYQRLIEQALKLAQRDLYDVKNELRRRKIKVHEVSRDEAFTMYSFIYEGYEEEHNYFNPRIRNQVSALLEYYLFKAAPDQ
253	NZ_CP023665.1	1236219	1236713	+	56670891	CP943_RS06295	WP_026579936.1	164	MULTISPECIES: hypothetical protein	>WP_026579936.1 MULTISPECIES: hypothetical protein [Bacillus] MGEKNKGKNYSIEDHIFSILVVLLMCVFLISSPFLIFFGVFKLVALAPDVSINTKGTFDSVIVLFKFFVLTVVVVGIVDVVFSQILLKKRRFLNFIIEALLMFCVFYLYVLIYSMNSQEIVIRNHGVFLVSLFLFILYLLINVAYIVSRRLYKATMKNIQKKNN
254	NZ_CP023665.1	1244409	1245644	-	56670899	CP943_RS06335	WP_026579932.1	411	MULTISPECIES: hypothetical protein	>WP_026579932.1 MULTISPECIES: hypothetical protein [Bacillus] MKLKSGLLFVMLVFALPLAACQNSGSGNTDGHKEHHTKNHSEMKEKDAVSLPNDFNKRAEEGLLVKNTKNTTRLDANTPEEMSIKTSQTIWPATHKQNRPGAVILVSGGSWQAALASADLIHHPNNGPVLIAEKGKISGQIQNEIKRLNPTGTSDGTQIMAVGEFDSLQALNSFKIKELKGKNEADLAKEIDKEYADAADEYPKSVIIGSSEEDAELYSLPAVNWIAHMPEPILYVNKKGIPEETAAALKKRDGKANIYILGPKKAVSEKTEDALKEYGTVKRISGDTPVANSIAFAKFSDKNTGFGWGITDPGHGLSFASTAAPELALAGAPFSHL…
255	NZ_CP023665.1	1266022	1266525	+	56670918	CP943_RS06430	WP_023856614.1	167	MULTISPECIES: hypothetical protein	>WP_023856614.1 MULTISPECIES: hypothetical protein [Bacillus] MSGVHDHDIKEAVDQLKSEGRDHYLDREPEESAGSGKERRPHNIWDLWWGIKPDRSKKHHKSKKHDDHEKPDKSKHDKSKKPDDCKKPDKSKKPDDCKKPDKSKKPDGCKKPDKSKKPHDCKKRDKCRSKRPDHHRCKKTHHHKRGGYETITKWSDGNLTEVIYRKK
256	NZ_CP023665.1	1322433	1323167	+	56670970	CP943_RS06695	WP_020450926.1	244	MULTISPECIES: hypothetical protein	>WP_020450926.1 MULTISPECIES: hypothetical protein [Bacillus] MKITERFFQMDSEWNVVHLPYKPNGFLVFIFGDRNHFVGEDSSFWLQHYGRNQLLTSLRNKGYTLVNSNLFGRHWGSEKAVAYAKQLIHYVFKQEILNEKIHLLAEGTGALIADELLRSIPNQIRSAAMVNPCLDLQAHHKREKENKFFYKQFIKEIAESYGITERKAADYPFKSISPYHNLVPVHIWQRLNGSPYPYMIHAKTFEERQLKGRHSVGLTLHLSEHPQRIHSAIANFFKTHEKVL
257	NZ_CP023665.1	1323254	1323829	+	56670971	CP943_RS06700	WP_105980873.1	191	hypothetical protein	>WP_105980873.1 hypothetical protein [Bacillus paralicheniformis] MKPALVYGADEFFGLSFCEHLLEEGVDIDVKLEQTSDEKKLMYLEERLMWLGRNEHFRLIEKELEAPYEQVFIQYTGSVPEEALAAGVENKPVILFVYQEQFEEDLRAGMEEKGVELIVLPDLFGPWDVRAEDKQNREGALFVNDAAAQAAACAVEKDFSDLQFVQKTPYDKADEIIEEWIRQMSTFFDKK
258	NZ_CP023665.1	1336360	1336917	+	56670984	CP943_RS06765	WP_009328837.1	185	MULTISPECIES: hypothetical protein	>WP_009328837.1 MULTISPECIES: hypothetical protein [Bacillus] MGKKKMLLGVTGTIGAINLPQFIYTLRDEYDIDVILTENAQRFLSPRAIRPFVQGVYENVFSDCSSKILHVELVNEIDRFLILPTSAATLSKIANGAANDLLSLSVLNYSEAIYIAPNMNNEMWNNPAVQKNVKIIKEFGHIFVNTTSLGIKASSGEIVQTEAGLPDPDELLKLLSEKGTVLSKS
259	NZ_CP023665.1	1363854	1364219	+	56671009	CP943_RS06900	WP_003180659.1	121	MULTISPECIES: hypothetical protein	>WP_003180659.1 MULTISPECIES: hypothetical protein [Bacillus] MQNRIEITEANLRNDRLVLTSEINDGAERKPAGRMLTDSDHFAFVYILEQDDSFEYVILNEGIWSDLKAALDANLPVFLHIGNTELELNGFHDELGYLIENIKDNANYGEEMEERVKRIFL
260	NZ_CP023665.1	1378268	1378621	-	56671027	CP943_RS06990	WP_003180698.1	117	MULTISPECIES: hypothetical protein	>WP_003180698.1 MULTISPECIES: hypothetical protein [Bacillus] MADREKLKAEVNPLTNTLVQNILRKHGVSKDNVRTLSEEEKENILKILEDLKAQSEALIQRQQEKKKEANNESSSQSEERPRRRRERSGKNKLREKLRQRRQQENTAQTEEKNGDLE
261	NZ_CP023665.1	1388367	1388822	-	56671042	CP943_RS07065	WP_003180732.1	151	MULTISPECIES: hypothetical protein	>WP_003180732.1 MULTISPECIES: hypothetical protein [Bacillus] MKLPLTKKERSNLRTAKVKIKNTAYMDLSVLAHTLGSSLERAAYIKALAQFQTAPSIGPKMAQCAVDLGYYSLGDIKHESGADLIIRLEKLKGYWEDPCAEDALRCIVHYANDPESAKSWWDFTEERKMYRERCGYPPDRPSTPWYEKKRT
262	NZ_CP023665.1	1399317	1399649	-	56671053	CP943_RS07125	WP_026579884.1	110	MULTISPECIES: hypothetical protein	>WP_026579884.1 MULTISPECIES: hypothetical protein [Bacillus] MENFNKLASLNNLNGDQEDTLLIRRNQLQMLKTGMRVSAATKLEGIKTTLRPKFKIDDIQKEMNSVYSSLLYSFEGKARQALAQRISQSAQQLIATEKDGESFVNGFKTR
263	NZ_CP023665.1	1406438	1406797	-	56671066	CP943_RS07195	WP_023856697.1	119	MULTISPECIES: hypothetical protein	>WP_023856697.1 MULTISPECIES: hypothetical protein [Bacillus] MKWLSKSLVASSLLAGMLAVSGSPMHVQAQELSKTESLSSHASAQGIFAPQAIVINRPMKVGQEDQYVGISNVSYSGSAITVSVTSDRVYVKAVSPGKATFSYLNSLGQLVINNITVTR
264	NZ_CP023665.1	1423542	1423883	+	56671086	CP943_RS07295	WP_105980889.1	113	hypothetical protein	>WP_105980889.1 hypothetical protein [Bacillus paralicheniformis] MKNESATYSPSPWRVVRTNSDLYIYSAYSKAEKKRFPYSSGRVIAKVADYSAYSKEKNASLIAAAPELLTAAKLTLAYLKRKRPARSNSVENQLINILEKVVTNAEFEEEENR
265	NZ_CP023665.1	1431612	1432052	+	56671097	CP943_RS07350	WP_035338940.1	146	hypothetical protei	>WP_035338940.1 hypothetical protein [Bacillus paralicheniformis] MNDETGSVMNFFYQVFPVVCYEKEIPDHFQIPSLYFPSPSVFDENDTVSTFKKVFTLNVKLFHHDSQQAHDHAERIADAVREARHIIPLIDRLGKDTGDNLRISRIETRIGDSGTASIIIQWNSRYWYKRENELSLETIDFTNGVK
266	NZ_CP023665.1	1444690	1445649	+	56671112	CP943_RS07425	WP_026579851.1	319	MULTISPECIES: hypothetical protein	>WP_026579851.1 MULTISPECIES: hypothetical protein [Bacillus] MDIQKPKPFRTTDKAHADLFNQVIDQLNTNDESIAQFAAEAEQRSTAYTDRHTSKKDNPHGVTKTQVGLGEVINKRQATKDEFDLHHNDQTRHVTEDERDKWNGSQIFNITGVDGQAKVYISAEDDFQTVLPHYTGLVHFTAASGASNGPGAAVRGIWTCNALGNYGHVIAFDNANRTYRKTISGGNWTEWTELVSVESLEAKLTNLTWHFPTLLNEWVNYADSTKARYTKDATGTVFVEGAIAKGKIGFNIPAFVLPKGYRPSRAFQFVGVASQLGMSNTPQYHRLQVSVDGNVVIENCSNTVNPNEYISFGFSFKAT
267	NZ_CP023665.1	1480526	1483117	+	56671145	CP943_RS07590	WP_199792123.1	863	hypothetical protein	>WP_199792123.1 hypothetical protein [Bacillus paralicheniformis] MKAQTELKWLNRAPAAFGGVTWGVPWAKGVLQKGETVAIASKNAPCLQTWPLAYWPDGSLKWTGHATVFPKESGSRFTLKKGGAGVPKTVMNVSEQKDEITVNTGAIVCRLGKSGTELIRSISISGEMMAKEGRLIALKEKRSGSDSQCMYHIERFESMIKRTAIEQNGPVKTVVKIEGVHRGGGIDVWLPFTVRLSFYAGDPSIRIVHTIFIDCEAETAWIKGLGFEMSAVLSGAPRNRHIRYAADGGIYGEASQLLVTRRFNETNGLYERQIAGQPVPEKSAVVRDAERNAVWNDFKLIQDSPVHWRLKKRTGKGCAWVDAIHGERAKGLM…
268	NZ_CP023665.1	1515579	1516241	+	56671179	CP943_RS07765	WP_026579823.1	220	MULTISPECIES: hypothetical protein	>WP_026579823.1 MULTISPECIES: hypothetical protein [Bacillus] MAYLKKALVFAVLSAAFVLVGCGTGAKENNGNQPSADTAKQKAPDLKTYSLDKNIRSEEDFDLIGKYVHAEDDQITLEIKDKELIVPKSSRFHSEEDHDDLIGKLVKVEVDGKTQEAEEAELMPQSKADQNGVYEQENDGSRKIIAAFVSESEQNITLKTKAGEKTYQKTADFERDVAEAPEKLKGKIVRLEIEKDGKAESLDLESEDQKLEWYEPSASK
269	NZ_CP023665.1	1517685	1518398	-	56671182	CP943_RS07780	WP_026579821.1	237	MULTISPECIES: hypothetical protein	>WP_026579821.1 MULTISPECIES: hypothetical protein [Bacillus] MTIRLNINDLHALARQFRYSHQRISDLINLLNRHFHVLFSSVKTARTYGIDQAQSEMEHELNGFLHTLDDLQHLLHFTEIRMKKTDQMLAEKLFQSGGRLAGYLPIMSFLAAAKCSPDSYRLTAPPLSEPLALMKQIKQNGLSGLFTKKRAAAYIQLDEEGQQQLWSARRMISRTIADNLCLLAYQQIAKGPLSLTVFLFGKKAEADAADVKTVCLSKNKTISAATLHSFSAKMYSG
270	NZ_CP023665.1	1518395	1518709	-	56671183	CP943_RS07785	WP_020451108.1	104	MULTISPECIES: hypothetical protein	>WP_020451108.1 MULTISPECIES: hypothetical protein [Bacillus] MIDDGIALERKIKRKIYQEDIHSLQLYVKEVTAAIDELRQESSSILKAHQMYINGWRGQAREMYDALLDDLDRAESRVYDRLRAIKEQASEEIERLQLKAEELT
271	NZ_CP023665.1	1525075	1525482	+	56671188	CP943_RS07810	WP_020451113.1	135	MULTISPECIES: hypothetical protein	>WP_020451113.1 MULTISPECIES: hypothetical protein [Bacillus] MRRFAAVLICLAVAMVAAGCQNEDEGKDRRLVAVEGMLEAILNDDVSKMKRLYVEGATPSPETILENKQKWGISGLRADDFQISEASIHVFHAAYKMENTGQPGTIAFRIRNDPDKGVMIDFIGYIKETKQQENR
272	NZ_CP023665.1	1561981	1563018	+	56671226	CP943_RS08000	WP_105980912.1	345	hypothetical protein	>WP_105980912.1 hypothetical protein [Bacillus paralicheniformis] MSQSHGSAFQLAFVYVGTVVGAGFATGREIVEFFLRFGWPGLAGILISGLMFTFLGAKMMLIAVRINAKSYQELNQYLFGHTLGKLVNVFMLVILLGVTSVMLSGAGAIFEEQLGFSNQAGMIATIALSLFVMMKGVKGIFGVNVIVVPLLLLFTVIVLFDSFIFRGPEIHNLAAFSAAKPDWILSAVSYGAFNLSLAQAVLVPIASELKSEQLIIKGALIGGCLLTLVLIASFLSLSTLPDVLLYEVPMAQVVFIVQHSVHIIYLFIIFGEVFTSVIGNLYGLEKQINEYLHMKSLYVFMFILLTIYLTGQIGYGKLISTIYPLFGQLSLVF…
273	NZ_CP023665.1	1570207	1570539	-	56671235	CP943_RS08050	WP_020451163.1	110	MULTISPECIES: hypothetical protein	>WP_020451163.1 MULTISPECIES: hypothetical protein [Bacillus] MENFNKLASLNNLNGDQEDTLLIRRNQLQMLKTGMRVSAATKLEGIKTTLRPKFKIDDIQKEMNSVYSSLLYSFEGKAQEALAQRISQSAQQLINTEQDGESFVNGFKTR
274	NZ_CP023665.1	1572900	1573214	+	56671238	CP943_RS08065	WP_075213209.1	104	MULTISPECIES: hypothetical protein	>WP_075213209.1 MULTISPECIES: hypothetical protein [Bacillus] MDSALNNLIISCHYALLGAIPYKLRGLAVKLENETLYWKGYFNGEPTDDEIEMLSVACTEVLADFPHIKDCEEEYINHKFPLKMDKLQFWAFLRWEDNEHDEIG
275	NZ_CP023665.1	1605637	1606098	-	56671266	CP943_RS08205	WP_020451191.1	153	MULTISPECIES: hypothetical protein	>WP_020451191.1 MULTISPECIES: YkyB family protein [Bacillus] MDDHNHTKELKPTVENLSKAIYTVNRHAKTATNPKYLYLLKKKALQKLLNEGKGKKVGLHFSKNPRFSQQQSDVLISLGDYFFHMPPTKEDFASLPHLGTLNHSYRNPKAHMSLNIAKQLLQNYTGIKEKPLVTNRKRPASKPVFKKLGESYF
276	NZ_CP023665.1	1621723	1622310	+	56671286	CP943_RS08310	WP_020451209.1	195	MULTISPECIES: hypothetical protein	>WP_020451209.1 MULTISPECIES: hypothetical protein [Bacillus] MFNEREALRLRLEQLNEAEVKVIREYQIERDNIYAKLRELDRPSSFNDTKKDFRPERKTESLPVLAELAAQEMKSYQQQQQQPQASQKNQQQTSPQTSSLPAGIPDGTTRRRRGTARPGSKAAKLREAAIKTLKRHNAAIKSSELQKEIEKESGLEIPNMTTFMQSLIKMYPEVKKPYRGQYILEGEISTETEQQ
277	NZ_CP023665.1	1627809	1628186	-	56671294	CP943_RS08350	WP_020451217.1	125	MULTISPECIES: hypothetical protein	>WP_020451217.1 MULTISPECIES: hypothetical protein [Bacillus] MAKREALKKQLLLLGELEQKIWKDFRKEREGIYARLGELDRQIQRHRRSTKEYYAAHCVDIIKQQKGKIVTTKELKMKLKERTNFNVHRISELYDLIQKLEPNISKERRGCFIYLENGSKKNVGR
278	NZ_CP023665.1	1667339	1669261	+	56671335	CP943_RS08565	WP_105980919.1	640	hypothetical protein	>WP_105980919.1 hypothetical protein [Bacillus paralicheniformis] MIELFSDYVLHFERYFILSRQSMLVIQWCLTGLALLYVVSFHPKVSRRRLFFYAGIALRLILVGALSFELAHQMKAAEFSNLYIEEQDALLPFMQFLLFGYILLVSFHYMMTLAEKGGKGLFFAFDIAVMTMPFFQSLFGSAVYLKENGADLEQLLLVLVLLIGVPGLMICLFFQLYWKRNRYVLLSIFYIVTIGGFFIKKLGYEFFPLNVFLTMLGFLMTYHLLNGSRKPFLMVKRVLAAGTAVFFTLLLNPFYNLADAAFTISHPEVSDVVDANFQPVSVKEAKQTVSSFFPTDSLIYLSATNQDFHNVYHFKTKDYEAYVDGWTGVITNY…
279	NZ_CP023665.1	1677785	1678267	-	56671347	CP943_RS08625	WP_023857266.1	160	MULTISPECIES: hypothetical protein	>WP_023857266.1 MULTISPECIES: hypothetical protein [Bacillus] MSIVTITGNVKYQITLDPSVWIFDDRKFDLDQFFSDFREVKDEDDDLVIDRERQIREGTVSPPTLKSEKKYEKEKLLDGTFGIKLEPFLKNAEVTGSAVKCLFKTEGEDVSVPIEEAGGMILCFSNNGKPLGEDGPVHVYFPDGSNRMTPVKRVKEIHIV
280	NZ_CP023665.1	1744440	1744805	+	56671409	CP943_RS08935	WP_026579751.1	121	MULTISPECIES: hypothetical protein	>WP_026579751.1 MULTISPECIES: hypothetical protein [Bacillus] MNDQLATIHTELLQMKEELEARLFEYSFFQQDSQGINSYQQVTLMYHVKEELQDVLLALSKIENGTYGICEETNQAIPLEKMAILPTARTANDFLYHAQFEKKTLPIWAETDETFNRALYS
281	NZ_CP023665.1	1806203	1807909	+	56671472	CP943_RS09250	WP_234026566.1	568	hypothetical protein	>WP_234026566.1 hypothetical protein [Bacillus paralicheniformis] MTLMMLNDVHNSLRKQFEQADPLQRISGTETDQKRLMLGKVLRFISEQFAEIQIGNTKWQGKLEAPLKAGAHYWFSYEKKPDEATGRLQVVEAFDKNPKTVQDAAFKLLNGLSLKRTKEAVFLVGALLKEQQPIRENDLRAAIKWLENLPKSDAQKGADAVMFALKRELPVHPGVLDSILAVKNPVPLNEQIAKTFDMITNATQQSAGMEKLKQALLPVLQAETEVHAERLIQKLAEHVRSLEKGELQGVQPLKPQVQSEIGNPLQKADAGGTQGQEAKAVQQQPQKAEIAAAKDLLAKLAAQAETNGTHIVKEAAGVIRALESSGSLGQAPA…
282	NZ_CP023665.1	1915807	1916142	-	56671574	CP943_RS09760	WP_105980946.1	111	hypothetical protein	>WP_105980946.1 hypothetical protein [Bacillus paralicheniformis] MIIDQEIKVKAMYRNIEHYKSIGYEINKGMQELSVKVEDLPINSHLKIKIRCDYCQCIFERSYRDHIKHQSKSSIKKDACKNCRGLKIKEHMLKTYGVESGIAFHYNFLKK
283	NZ_CP023665.1	1918396	1918737	+	56674022	CP943_RS22285	WP_158700703.1	113	hypothetical protein	>WP_158700703.1 hypothetical protein [Bacillus paralicheniformis] MNTSNAASPKQRKRQGEKSIKIKCHMRKRLGDKDKIKIEVSGFINSHLHKSAAGAGKENEGYGKGLSMSALKIRLDFLEKIHSNKRKNKVNPNDNLKLSLSILPIEHKMLLYK
284	NZ_CP023665.1	1919307	1919981	+	56671578	CP943_RS09790	WP_105980950.1	224	hypothetical protein	>WP_105980950.1 hypothetical protein [Bacillus paralicheniformis] MKKSFGILFSSVLLFSMMPFSALASTESFEGKTISSDEMISVSGKEVENTRVLVRAINELDAKLDMENLPANSQKEINQLTPEAKKLYDSIASYKNQTSASLTSDDALVIFSEYVGELNKNKLSNPKKQTFTTMGLGINYKEYKISNSKIKQLSNAVGYNSGFWATATAIAKIFAKSPTALTLMLAAVPMLGMSVINSCNSKGKGIIITKMGSGATNTYSCRSQ
285	NZ_CP023665.1	1924723	1925112	-	56671585	CP943_RS09835	WP_020451469.1	129	MULTISPECIES: hypothetical protein	>WP_020451469.1 MULTISPECIES: hypothetical protein [Bacillus] MFYDQYPVNPFSFPSFHRPFGIESSTYVRNMRAFRDLDHLRRNIVRLLGRMGYVLVRIGVDQFNNLGVTGQRPGTAYQELCEIWIYHKHLEGRSYEETVLAECTTDEEAKRHVDQVVAALQGMVRPIEP
286	NZ_CP023665.1	1928689	1929075	+	56671589	CP943_RS09860	WP_025811456.1	128	MULTISPECIES: hypothetical protein	>WP_025811456.1 MULTISPECIES: hypothetical protein [Bacillus] MEKKYPYFKCLIPITSNKDIDDLARIISVKLFGGIPFGGMEEQIYEEVPAVFIENPILGFQVVIQGFGGEKGYTLEVRSHPEIIEPDDADEIEVDITRYVSTLLEGTDGLQIRYEELQNMKHYIEITE
287	NZ_CP023665.1	1948924	1949229	-	56671610	CP943_RS09970	WP_020451493.1	101	MULTISPECIES: hypothetical protein	>WP_020451493.1 MULTISPECIES: hypothetical protein [Bacillus] MENVEHLQQTPAPEQHMHIPQYQHAEAAVHHIKCPLFPHLKHKTLCTVAPFVHYGLNEAQTTSYHHAMEEVAAMAYLMGMGMDPHLAYCTVESWEINETFY
288	NZ_CP023665.1	1957343	1957960	+	56671622	CP943_RS10035	WP_105980957.1	205	hypothetical protein	>WP_105980957.1 hypothetical protein [Bacillus paralicheniformis] MGKMDEIILVVLRENVFANETLTFQGVNSDGEKVGKIMAHIEQHFSEMRRGDAEEDPAFKQPIPYVVIKREDEIFVYERLEGGGEARLHNKLSLGFGGHMNFAEGLDFSGILKLNTDRELDEELLIEESDKEKMVTLGLINDDENSVGKVHIGILSALELKPGAHVEVKEKEQIAGRWMKASDLKDKSVYDRLESWSQFVVDILV
289	NZ_CP023665.1	1990684	1991016	+	56671659	CP943_RS10225	WP_023857630.1	110	MULTISPECIES: hypothetical protein	>WP_023857630.1 MULTISPECIES: hypothetical protein [Bacillus] MDKLIELIKKAFYEIAGVLLALAVIAVLFLPGSGGYKAGDETEILRNIHGAKSIEMLEKNYGSISELRSDGVNTIDIPRYKRTKIIKTMDDRDLALIEVLSGSYRSTHWW
290	NZ_CP023665.1	1991103	1991801	+	56671660	CP943_RS10230	WP_023857629.1	232	MULTISPECIES: hypothetical protein	>WP_023857629.1 MULTISPECIES: hypothetical protein [Bacillus] MVNVLTNILKNDRLDVYPLFKKFCSLKEKGLRKESFKSLSSFIDEAKMWDDNAQQNFACWLFALFETSEDIHHVLVHPLEKELLKPLLERWMKSNPEDPRPYRWYGVFLNTEKRVDYLHNALRLGGSNEQLSLLTLIDINLNALWYSFHHISEDLYLGDIKEDTALLAKSRELNNKVECQQTRKNNNEALNYYQDLLNDWVMFTKEQSKGFVEWCEHKGRNYYWVKAYYYEK
291	NZ_CP023665.1	1992467	1992844	+	56671661	CP943_RS10235	WP_103750441.1	125	MULTISPECIES: hypothetical protein	>WP_103750441.1 MULTISPECIES: hypothetical protein [Bacillus] MVLKERGQIDQEFGAEEIADYLRLRGFKPKVDVMHFGDHSGGSITFWYRLRRYYIALVQFDKPGDKDPLSSKNGFTQLGMDSKGRAEEIMMHLVAYFNGWYRTNKEPFPEEEEWLNLYLEYNECE
292	NZ_CP023665.1	1999885	2000472	+	56671668	CP943_RS10270	WP_105980972.1	195	hypothetical protein	>WP_105980972.1 hypothetical protein [Bacillus paralicheniformis] MKSMKARVLMVLSAFALLTTVVLTTPAATVQAKNATESLINHQEVSNVVQNVDEKDMEKAKKFVEEALKTNENFTYSVDRQKALQIGFAVDQVTNMAMFYENLPTEQVKFLEEGKQVAVKGDNQIKPMFVPALPWVVYISLQELIALLTALGLAGVAQQFLKDVYTHGIKQACKKFSKKHKKIKDFCKNNGYPTK
293	NZ_CP023665.1	2004817	2005134	-	56671674	CP943_RS10305	WP_039072731.1	105	MULTISPECIES: hypothetical protein	>WP_039072731.1 MULTISPECIES: hypothetical protein [Bacillus] MFIKYNEYDLLELFESEPASIADDPEAGEFIYTYKDNQNFKLILTLDVYQLTCSLDITYKDFAVFTGVFQNVTSIKKVENFMVVSIGEEERIKVKFTKQVGVELL
294	NZ_CP023665.1	2006859	2007161	+	56671676	CP943_RS10320	WP_039072733.1	100	MULTISPECIES: hypothetical protein	>WP_039072733.1 MULTISPECIES: hypothetical protein [Bacillus] MNFDPEKLRKFLNCASNPSNPMETKVKNYYVNQEIQEFASFDIDFENVDIALRIAGMLGKSATKFTINHFLFPDTNKIDYIQFIIFEINDSELLAFLEQL
295	NZ_CP023665.1	2010695	2011171	+	56671682	CP943_RS10350	WP_026579660.1	158	MULTISPECIES: hypothetical protein	>WP_026579660.1 MULTISPECIES: hypothetical protein [Bacillus] MFDEREALRLRLEQLGDAEIQVMRELRKERQDIYSKLRELDRESDPAINKKSSLIDLASAAAEELKQSQIAADKHPPIKTPSHTIFQSKTTIQREAALNILSRYEEGLKGIKLKTEIEKETGFPIKNMTTFMKSLMKHRPDIKKPARGHYILQKEKDL
296	NZ_CP023665.1	2011816	2012436	-	56671683	CP943_RS10355	WP_026579659.1	206	MULTISPECIES: hypothetical protein	>WP_026579659.1 MULTISPECIES: hypothetical protein [Bacillus] MELTITRALSELKMLDKRIKRAVNESTFGGLMIGKKLPNGFRTTEDLETRAKADYQSIEALIKRRNAIKSAIVVSNATTKIEVAGVKMTVAEAIERKTSISYDIQLLDKLKEVYADLVDEAESVNQKVTERLDKHLETLFGKDGKVKAAENQEIVKSFLAENEAKIIDPLNLKEKIDSLSKKIEDFEMEVDFALSESNTLTKIKID
297	NZ_CP023665.1	2015458	2015898	+	56671689	CP943_RS10385	WP_026579657.1	146	MULTISPECIES: hypothetical protein	>WP_026579657.1 MULTISPECIES: hypothetical protein [Bacillus] MKKILFLMLFSIMMACSFHIHPADAAVTKDEKKTTMTMSEDQVGFFMADSTNVNYYPTWLYYKFTIFNAEGCTLNIKLQRITLTGHAITLSEKEFTGNHLHLSAADKVSGTPHRNHFLDITKVSGCGDVGITGFYGFEHEMPDYSS
298	NZ_CP023665.1	2018965	2019267	+	56671694	CP943_RS10410	WP_020451581.1	100	MULTISPECIES: hypothetical protein	>WP_020451581.1 MULTISPECIES: hypothetical protein [Bacillus] MKDGCHQAIAAVSYYKTERTIDFNRQTYTKKHNQMYLYNDKILTASRQYRLEHVHDVSYRPFSEAGLLYLHTNQGVFAYEVDADPGYFIEAFKKQKNPIK
299	NZ_CP023665.1	2024931	2025692	+	56671702	CP943_RS10450	WP_026579652.1	253	MULTISPECIES: hypothetical protein	>WP_026579652.1 MULTISPECIES: hypothetical protein [Bacillus] MMFAPDAILRTWRRFDAFPMETLTKAWFYHQGGDQKQRNVSMMKEHHQEYGIAGNCFDLSIWLLDEFTKDGVEAFPIGRSFKTERAHAAVIALDERGRRFLCDLGDQWLQPILIDCECEDYTSEKLDGFFPAAQIQVKPTTGGVKVLYHRPNGKVSTQVYSTEPVDMSVFWEAAECSQAALKPAPLLECRIPFQHEIAHWEFSGWDIYLSTSKGLYREAKPDTIEGWTEKIHDVTGYDKNVIKKALEIYQTRV
300	NZ_CP023665.1	2041116	2041418	+	56671726	CP943_RS10575	WP_020451608.1	100	MULTISPECIES: hypothetical protein	>WP_020451608.1 MULTISPECIES: hypothetical protein [Bacillus] MAFGIKRNELNEWKRAVLNGEVAFLTHYWLDDRYPDVNTVTKAGCGNIDKLAEWGKQYGLKKEWIHKRSKFPHFDLLGEKQIEILKQEKLSSHIKRFRLE
301	NZ_CP023665.1	2058748	2059092	-	56671740	CP943_RS10645	WP_020451623.1	114	MULTISPECIES: hypothetical protein	>WP_020451623.1 MULTISPECIES: hypothetical protein [Bacillus] MKKTLFLQLSIFFLVIASLHSFSMPQMPANHHTQKAAVSGDELHELTAGKYGEEKAKSLWNSLGFGAESILLFILAAASGQAFMMNRRKEHLKAFMLAVFYHSSYFDKAHVLKP
302	NZ_CP023665.1	2060878	2061222	-	56671742	CP943_RS10655	WP_020451626.1	114	MULTISPECIES: hypothetical protein	>WP_020451626.1 MULTISPECIES: hypothetical protein [Bacillus] MYPYDPSLYDPYRQQFPPGPPPGVGGQQQQQFLPPPPSQFPQDTGPSVFAVDPGGIRRCLFKYTFIRLRNGSRFWFYPVFVGRYSIAGYRWRPRQFRWVYFGIDLNEITSFSCQ
303	NZ_CP023665.1	2104532	2104846	+	56671778	CP943_RS10850	WP_023857538.1	104	MULTISPECIES: hypothetical protein	>WP_023857538.1 MULTISPECIES: hypothetical protein [Bacillus] MAEKQKRVPFFKKYWVSQIGVFLLSQIIFITFETTGWIPNYREIDGTLFGRITESSIFIEWFTFYETPQLNLLTVFFGVFFLVPGIISALKNVFSPRHYSNSSK
304	NZ_CP023665.1	2133677	2134393	-	56671803	CP943_RS10980	WP_079289103.1	238	hypothetical protein	>WP_079289103.1 hypothetical protein [Bacillus paralicheniformis] MMKIIQLIRGDMKQIKRDSMLAFYGLAPFLLIIVTAAGIPLSAELAAFNITPYRHLIMSFAMLFIPLILGIMSGFVLLDERDENMIQYFAVTPLSKRGYVLIRLILPMALTFCYSILLFASGGLMALGSVYLLFILIMVTLEAPIYTLLLAAYASNKVEGLALMKGFSLLTFMPAAVYFIPLPWQLFGVFTPTYWTAKTYLAGTSHEGLVFVFGFIGVVLHVMILLLLYRRFLVKTDQ
305	NZ_CP023665.1	2258700	2259242	-	56671885	CP943_RS11390	WP_020451763.1	180	MULTISPECIES: hypothetical protein	>WP_020451763.1 MULTISPECIES: hypothetical protein [Bacillus] MKSLIVNHLFDSLNKEMDADWWAKYLDLLVEFAEERALQEQDSSSDSAEESIDESLKPLISELKSIFESINNNILENNNKVLKDILGAAAQGMDRQVLEEIIESVRSEAQLSNTETAESLGTLKESLSDSGTAAGSTKSVERSVVETLKESLPEDHTIPRTETVEVLRAVQEKHEENENN
306	NZ_CP023665.1	2261322	2262302	-	56671888	CP943_RS11405	WP_020451766.1	326	MULTISPECIES: hypothetical protein	>WP_020451766.1 MULTISPECIES: hypothetical protein [Bacillus] MKKRIFSLLMLMSAFVLVLAACQQADPKGSYATAYKKLISAKSYEFSSDIGLKVDASNLGAEDKQVADMLNDATLTISGKTNAETKQSEAVIKAKLKVQNMSLDFDIPVYMDEKKQVGYIKIDSVLDSFGFFLGTAGMNFDSVKGKYLEFPLEDDKTSSQDTDELQKQLMESIKEAADNLPADKFEKADLTDKEKEQGAAQKVAFSFSDKEIKAAVVKFIEIAGKASGEAVPKSELNKIKDGLKDVTFKKFDVTSTIDDKENLLTENADISLSVDSKKAPQSLGITASTTYKNIDGDVKFEHKPNKEDIVTEEEFEKLMAKDAMNF
307	NZ_CP023665.1	2268845	2269366	-	56671894	CP943_RS11435	WP_079289251.1	173	hypothetical protein	>WP_079289251.1 hypothetical protein [Bacillus paralicheniformis] MDWLEFVSATVQSLAWPATLMMCVLLLKEPLSERMKELIKLKYKDFELEFDKRLQKLVSVREKRLSGLTSVRSAPAGENMIESAWSDVHNVLRETASTFDQNAIRLEGDELIQMLHDRGMIQDDAASVLSELSALRRDASDRVSITGALAYKTLCLEEAKRLQLLAEQQTAIK
308	NZ_CP023665.1	2287360	2287797	+	56671913	CP943_RS11555	WP_020451788.1	145	MULTISPECIES: hypothetical protein	>WP_020451788.1 MULTISPECIES: hypothetical protein [Bacillus] MKRFLLVMVLFCGFFSFGSSAEAYSFPHKLNLTFTGTHVEDIPYSDSNVSHWHIGYKFTIFNAENCKTTIKIQMMHLSGRFMSLSIKDFEGNWPDRTAQDVITLMPRTYRLYFENTEGECKDIRIKGTYGAIPQTYDNFSVFSQR
309	NZ_CP023665.1	2293287	2293790	+	56671920	CP943_RS11590	WP_031305168.1	167	MULTISPECIES: hypothetical protein	>WP_031305168.1 MULTISPECIES: hypothetical protein [Bacillus] MMKRLGSLALSLVLMLPAAAIQAQPAAPIPYPCSVVLHPAQDIPNARGTALIAKVKKPYTEAPDSPVRERRSVGIYADWLPAPASFGDYDQYEGMARIPDQISWRFTMHLVREDAPSWFGGSLWAGKFDEISSELTVNTRVEVRPFNSKTKKAGRAVLQGTLQGCRN
310	NZ_CP023665.1	2347508	2348188	-	56671977	CP943_RS11890	WP_020451848.1	226	MULTISPECIES: hypothetical protein	>WP_020451848.1 MULTISPECIES: hypothetical protein [Bacillus] MKSNAPKFKVGDVVVVVMYGTVGTITKVHKIDKHFLYEVNHNEVLYFETSLQLYKDYDGVIVDTEKLDIEYEFLIGDVVYVKDYGKELFKITGHRTEIWRYVEDGWEDIIYELTRLKDGEWLETEEEDLTLVLRTYEMDQFVHQLLFVHYVGEAGQELDEPISEKVFLPFAGDPEEHEHERNMAVAVVDELLDIYNDYKVLYEMFQDAEYKEMMEFVLSSLKEYFK
311	NZ_CP023665.1	2401433	2401795	-	56672038	CP943_RS12205	WP_020451907.1	120	MULTISPECIES: hypothetical protein	>WP_020451907.1 MULTISPECIES: hypothetical protein [Bacillus] MNSVSQEIQDLSIQSLESTFNKLTNAYKSTKEKGSNTTLVKKRLNAVKIGLESLKGIWNGEDFGYNEEIILTSKEVLQGIIPSIEKQIAKAKEGSPQKTLNERRLTALKLAIESLENRLI
312	NZ_CP023665.1	2402319	2402780	+	56672040	CP943_RS12215	WP_020451908.1	153	MULTISPECIES: hypothetical protein	>WP_020451908.1 MULTISPECIES: hypothetical protein [Bacillus] MYYYEPAKKDYWDYDYDPYKKDHDYCKKDYYYHEPCKKDFYYHEPCKKDYDYCKKDYYYHEDYKKDYDYHKPCKKDYDYCKKDYYYHEDYKKDYDYHKPCKKDYDYCKKDYYYHEPCKKDYDYHKPCKKDCYYEPRKKCYDSSYKKKNDSWIY
313	NZ_CP023665.1	2410525	2410944	+	56672049	CP943_RS12260	WP_020451915.1	139	MULTISPECIES: hypothetical protein	>WP_020451915.1 MULTISPECIES: hypothetical protein [Bacillus] MDFKENDNHSLSKKDEIQEAVEQLFYNSPFHDILNSFQKLISDQLQNSTISMNIREENEALHVDIAVPESFQNGDIMIEAKSRYLHVALKEKKESGGSSSFTSLSRTVLLPYPVREETMKTSWNRNILTVSFPEQKKHE
314	NZ_CP023665.1	2417160	2417624	-	56672058	CP943_RS12305	WP_224067372.1	154	MULTISPECIES: hypothetical protein	>WP_224067372.1 MULTISPECIES: hypothetical protein [Bacillus] MRKRRPESGERLDVLLENPLCCDFFQDIEEDKPWEHAEEWVPLLFAAWERTKEKLLPVFKTRKSRCSQDDMLNGVCCLIASLHWTMGEPVTSLNWEAITRKDFGAKPMNWTERLEFILQKPTQYHCFIQLDELFTEMKKQFYKYVAINHKKATH
315	NZ_CP023665.1	2460884	2461600	-	56672106	CP943_RS12550	WP_020451965.1	238	MULTISPECIES: hypothetical protein	>WP_020451965.1 MULTISPECIES: hypothetical protein [Bacillus] MKIVNALLVTVLTAIMLSGCLYPEERKAKNSVPYQHQLKEVQAAVDEFREATGGLLPIKTRDMSVPIYQKYPIDFNRLSPRYMAEPPGTSYESGGEYLYVLVDVEKKPTVKLIDIKMSEMIRELKLRVEMYKDQHKYPPYKKVVSNHLFMLDHEKLGLKEAPSVTSPLSGTSLPLLVDEKGDIQVDYRVDLANLIKRSKKTVKPGEEIQDLMWKETPFVPAFSVKYTVNDKQEPVFLE
316	NZ_CP023665.1	2465766	2466368	-	56672113	CP943_RS12585	WP_026579374.1	200	MULTISPECIES: hypothetical protein	>WP_026579374.1 MULTISPECIES: hypothetical protein [Bacillus] MEEFYYYWSMWFLWVLTTFILEKNSFRFYASAFILLNIMLSMYQIQLFLHFNAAYLSFYIGAFMLCGYLRLHKSVKRLLLHLSMVSAYGFLFLFALYDPVWFILKPEWLIIILFVIMTTAFERSFAARLGMFVLGACQGELLYTFVIRKLYGDIAAGGYSWLSMCAAGIVLVYGISQYERLMHQFYHKWKRLNKGAAKMS
317	NZ_CP023665.1	2511624	2511968	-	56672161	CP943_RS12825	WP_020452015.1	114	MULTISPECIES: hypothetical protein	>WP_020452015.1 MULTISPECIES: hypothetical protein [Bacillus] MGKIRFKLTVLLVLAAVLAGGFYYLKNGSVQDVSTALSQTVSSEEKNYTIYQYKITKIDGTEYHGVSDNGTKIIFNAKNLNQDLSDIKEGDKVKAYFSNANRIDGLIKVVKVAD
318	NZ_CP023665.1	2520730	2521053	+	56672169	CP943_RS12870	WP_026579354.1	107	MULTISPECIES: hypothetical protein	>WP_026579354.1 MULTISPECIES: hypothetical protein [Bacillus] MYPNRYPYTPAPGYTPEDVYGSYQPAVHHEQRIYEPYEGQIITAPANTRFWRRGTEVFLHSSTFDPSGREMLYVVYPIRRQNNICSLRAVAISANEYRGIGTPEFDY
319	NZ_CP023665.1	2544957	2545280	-	56672202	CP943_RS13035	WP_020452052.1	107	MULTISPECIES: hypothetical protein	>WP_020452052.1 MULTISPECIES: hypothetical protein [Bacillus] MQLEITAQAKQAIQRATEPYPDKKIQLRYDSEGCGCAVSGVPVLWLTDELSGSCEPLETNGLPIYIQSSQKVFFDEAMTIDYYEKAGALMLKSPAQVLSPRMSILVK
320	NZ_CP023665.1	2562728	2563216	-	56672223	CP943_RS13145	WP_023855959.1	162	MULTISPECIES: hypothetical protein	>WP_023855959.1 MULTISPECIES: hypothetical protein [Bacillus] MKKAILGFSLSAALLVPSSFAAAAGDGQLTSEQKELLEAKTEYVQSLPEQASVQSGVTAYAGKRLTIKRGSFLAWSKDYIDWYYNGKKVSKSSGSQDVGYVFPNVVRAKGIKRYYKSSGLHKWRAKKTLSFGTVTPWGDVEFASSTFTDRRWVNKKGKYGND
321	NZ_CP023665.1	2616873	2617571	+	56672237	CP943_RS13220	WP_095291176.1	232	hypothetical protein	>WP_095291176.1 hypothetical protein [Bacillus paralicheniformis] MRKLILFFVAVFATIGLTMPSQISAAEVHANDTAFKYTIEDYINYLANYSEEDAINGGVSPEYVSSAVFDAQNVLNQFKAMPKEGQQKFVDNLTKFDTNALTVNTEVNEEEDIIAKPQANKSVSYTDSVKFFGAPVTTYRVSVNYSVTKGKVKKINSSSAYVVRNWNPVVRTELNPGGKNAWVTGDNKAAVTGSFFYRIGPLKDFAVQLGNVHLKAVGDKNGKRTYKKTRLD
322	NZ_CP023665.1	2689835	2690221	+	56672311	CP943_RS13605	WP_020452152.1	128	MULTISPECIES: hypothetical protein	>WP_020452152.1 MULTISPECIES: hypothetical protein [Bacillus] MKQRVHPVSALIIAFGIFGFVYFAVTSPGRLLQYLVVFAAVGAIIYFVIRRISNRDMGSEGAAFKKAAKQSNKRFQDHKKRSIKGKVNHLRSVPSINKSKPVLVKKKSQTQLTVIEGKKSKKKNRAFF
323	NZ_CP023665.1	2708344	2708691	-	56672333	CP943_RS13720	WP_023855191.1	115	MULTISPECIES: hypothetical protein	>WP_023855191.1 MULTISPECIES: hypothetical protein [Bacillus] MCKKNRGFTTVEAVSAFGIWVMITMLLIPMVHQLSLQRGASEKEEEAYRILDEKISRYTLTGRFQPKETVLYRNTSYFIEWKEQGDDYKVCISIKKRDSQRRCFTILRSKGIYPS
324	NZ_CP023665.1	2714979	2716088	-	56672345	CP943_RS13780	WP_105981078.1	369	hypothetical protein	>WP_105981078.1 hypothetical protein [Bacillus paralicheniformis] MAGLRVSLWLIAAVMTVAAAGCTPQHQEGTKSVHHEEPEGKKKSSAAVKDKKVIALKDRHFDEAAGWLDNETVIYTATDPVAGSEVKSYDIFKGTGETIYKTDDRLIAAEVNREKGMILIQTAGNGSEMKLTLLNLQGKQLYTKKFRTHELQVDWNRFDPYLLYVTTFTKDWNYESRLIDAKEQQTEKDIAQAAFVHWTSADTFEYIKWNERNREKPAPVYSFNTADGRKKKLAGDAVLLDVLGDMRLIVAPSSSHRQGTYIFSDVSSSEKKISFKLPLFSEYGSLSPMEYSYDPRHELFYTYQPNESGSLYDLISVSLKTGKREVIREKVEM…
325	NZ_CP023665.1	2727259	2727756	-	56672356	CP943_RS13835	WP_101561082.1	165	hypothetical protein	>WP_101561082.1 hypothetical protein [Bacillus paralicheniformis] MKRIIISKKPFQHSIRSESLFCNDILKISSPDHETVRLSWEISDAVLSAAEAVLFESIKDVEKQILLFCVKNGERSVRTIHTDAFKGEASVFPAAGNAFYKAEYRIYNSLNMSLAVLTSGCFYLGENGIHSNSSCFLYHDNQQDWTTQFSAYTSYSLIEGKERFR
326	NZ_CP023665.1	2727932	2728282	+	56672357	CP943_RS13840	WP_011198121.1	116	MULTISPECIES: hypothetical protein	>WP_011198121.1 MULTISPECIES: hypothetical protein [Bacillus] MEIAIIALLVVSIALIAFSYFQREPIKEVEQELETLQLSAMQEIYKLKKKMTVLEEELLDSNVVVRRPNAGISQHIAKQILSKYQNGMSVDAIAKAEHVSVEDVKAIIKDNERVLV
327	NZ_CP023665.1	2731121	2732815	-	56672364	CP943_RS13875	WP_020452199.1	564	MULTISPECIES: hypothetical protein	>WP_020452199.1 MULTISPECIES: hypothetical protein [Bacillus] MLNKRVLIANFKLTYRRTLNRLIYFFPSSENLLKSNKILFVFAPFFLVYIFILYKASQTLLTGVPEHILTLGTNFIILFFVLNILKSSTDIIHRYVYPEDFLLLHTLKTDPKKILLSRFFTTIFLNILFKLTVVLFPILFFINFSTHDRIYLLLSFPSLLIFIVGLTSLYSSLTYIVYSKFLHNILNSRLKSLLSLIGIACISAISTTFLGWIGLNYFYQNDLLEAIGNFIYLFKLDTILTTNWLPTNWFLLSTSDIHLFFLCSIGYIALGCLFAFITFHLILKVLIIKEAVPNNLLPKLKPIKLPFLSFLQKTLPRQNIAILKKDLTALLRANFTI…
328	NZ_CP023665.1	2746773	2747144	-	56672381	CP943_RS13960	WP_023855219.1	123	MULTISPECIES: hypothetical protein	>WP_023855219.1 MULTISPECIES: hypothetical protein [Bacillus] MERDQNVRGRNRAGYDADLVDATLDNDDFLEETAAEVAPTYRTDNRDNGDARNDADAAGGRVTGYIALALSIISLFMLPVLLGIAGIIVGYIARRQGAAGLGAWAMGIGAVSLVLGIFITPFF
329	NZ_CP023665.1	2753901	2754551	+	56672390	CP943_RS14005	WP_026579290.1	216	MULTISPECIES: hypothetical protein	>WP_026579290.1 MULTISPECIES: hypothetical protein [Bacillus] MFQQQPMRNQPGPQMPQRPGRALMPRHPGMRMQPPQAQQRGLQQMFQPMGAAQEQAGARGGGGIQGLLSKILPGSAASGGTGAGLGGTGSGLGGIQGLANPATISNMLGNVQKALGVAQQVTPMIQQYGPLVRNLPGMVKMFRQLNSDDTEAEDSEQQKDEPDNKTETSGEKKEEIKVSSKTPEKSKAEEIRKKRSRSAPPSAKRKTGGSKPKLYV
330	NZ_CP023665.1	2758937	2759596	-	56672396	CP943_RS14035	WP_224067291.1	219	MULTISPECIES: hypothetical protein	>WP_224067291.1 MULTISPECIES: hypothetical protein [Bacillus] MNDLSNSIKSLEPINIPCGWFVKYHDLTVTQETVEPNTKLIELEKQRYHAAVKIIKGHDDYLIHICDNHGETIDTINVEDRRQLVDELERIIWKIEAAAFGGNIFIFEGPPDYLRLRVPQGWTVSYNKLIDIDPDQLEEDSDDWFNFTSSLLQLEHKESRLTLDVGWYIDIDPSGTFYMLLIKNLDWDNPLEDMETRRPEKLVDHIEATLQKAAEHKYK
331	NZ_CP023665.1	2760578	2761081	-	56672398	CP943_RS14045	WP_023855233.1	167	MULTISPECIES: hypothetical protein	>WP_023855233.1 MULTISPECIES: hypothetical protein [Bacillus] MDFGKNTPLVEEVISFIRNNKMFFSKNFNVPNLQVINSFSDAQNFAWSQDLNEVDTVWENVKSLGTENIVEKIYDLDLATQQDELYEYFGDYENYSENFLPFDYVDIHEEIEGDLTMCALNRLVNGKTNNFYEKVFEIYKEGGWPCGWKGTYPKGEFIVFVPSSSNE
332	NZ_CP023665.1	2783167	2783619	-	56672422	CP943_RS14165	WP_105981089.1	150	hypothetical protein	>WP_105981089.1 hypothetical protein [Bacillus paralicheniformis] MLDILFDNPIIMAAIIAAISFIFNKLGKNDENEETKRKPAPERPKTQTTPKQTAQRQPAENKKQRPAAAAAAAKSEDIAAELRRIQADAERSMPAVERAIKKQSSRVINRKQELLDMNKNTIVQGVVLSEVFGPPRSRKPHYTMRRRPKI
333	NZ_CP023665.1	2825149	2825628	+	56672468	CP943_RS14400	WP_023855267.1	159	MULTISPECIES: hypothetical protein	>WP_023855267.1 MULTISPECIES: hypothetical protein [Bacillus] MIINRLAKGFIVIASLALGSTSFVQSSQAKENDEIDTNATGTSVPIVYTVDSLFTPKVELQNKNSATKPVKDAIRAVLKNKAKLFQLVERLAGKKVRNELEERFTKYIEPVLKDLLDEYYAFGWSDVQNKLYNSLKKSGLSNINAKVLAYWTTIAIKSF
334	NZ_CP023665.1	2825662	2826129	+	56672469	CP943_RS14405	WP_026579257.1	155	MULTISPECIES: hypothetical protein	>WP_026579257.1 MULTISPECIES: hypothetical protein [Bacillus] MKNKKRIASVVLSATLLTSFLGTSGALASEKTASSTPVAMKVTVHKGVQNAIKSQNVPVKTVATANGNFQTQGAVSWTYKAFKLALRSGGWVLSQMLRPLSPKAAAWVRKNSAKVAKLMDKGEKWTENQFYNGLRGIGCPPDVARALAKFIITLI
335	NZ_CP023665.1	2826197	2826754	+	56672470	CP943_RS14410	WP_023855269.1	185	MULTISPECIES: hypothetical protein	>WP_023855269.1 MULTISPECIES: hypothetical protein [Bacillus] MTIFTAITLAILSCLVISCVLFLLLIKKGVIDNPPNTLAFISFILLIGFCLFFAMAVPSLIIYFVSLGVNHFLGDYVNYSSRSDLYIFSLLVSALALVYMLILMAVIKGLSIFLRIPKWITYIFEFAVAWIAVYFSIEYVTNSHLSNVSIFQGGELLLSFFITFLFLGCDILFSNLDEISREKLG
336	NZ_CP023665.1	2849409	2849798	+	56672496	CP943_RS14540	WP_234026541.1	129	hypothetical protein	>WP_234026541.1 hypothetical protein [Bacillus paralicheniformis] MPRDYAKEIPDIETKVKNGHVTLKVNENGDEYKFFKNGVPVYEGDFNEYSDDVSTIGDKYKIGIFQKEELKKVVTLNVTNGLGEKALNSSEESYAEDLMAYQIQNGHLNVIADAAFSFHGMNFLQRRSI
337	NZ_CP023665.1	2850011	2851480	-	56672498	CP943_RS14550	WP_234026542.1	489	MULTISPECIES: hypothetical protein	>WP_234026542.1 MULTISPECIES: hypothetical protein [Bacillus] MWNKKELIGCCVAQLKNLGLYVYRIKGFFGGKNGKLPFFDDRIVCNSINKEDFMKKKFLFIGVPIVAILAIILFILGRSPEPSDLAKEFEEKIKQEDAKGLLKLVKVDNGTKWEEREAESIIKYLKDDESDYKDQIMLLNAQASYYESDGKANNLISQQYPGESISNIGPFYITKEKGIFGGEKYVLKARGYKLEVHAAKGANVTFNGETIDMQGKDSKELGVFGPGVYTIKGSKKYDYTTVDDKTEVTLFDPEKFEKTASLNFSGDTVSVNSDIPNTKVLVDGKESGESISENTEFGPVKDGIKLQGVAEFPWGEGKSEAVTVQSDTTEEYNLTPN…
338	NZ_CP023665.1	2851951	2852448	-	56672499	CP943_RS14555	WP_234026543.1	165	MULTISPECIES: hypothetical protein	>WP_234026543.1 MULTISPECIES: hypothetical protein [Bacillus] MHFTLETTYHENGIVEAIVTENKHTTHIQYNPATGMTLLNGVILETKKEFEMGLSAYKQVYMGTVINYVPAGTLVGAAISLTSIWSRVPASRVKQTVLTLTSLAVGETLDKSIKVKIKQYRTSKPIQDGSMCYQQYKYKHKSTWYYKKKQSKQQSSSWFLQSKPC
339	NZ_CP023665.1	2895822	2896202	+	56672543	CP943_RS14780	WP_020452350.1	126	MULTISPECIES: hypothetical protein	>WP_020452350.1 MULTISPECIES: hypothetical protein [Bacillus] MKFSKIGALLLTLACLLLPFSSASAAGSGVWDNIGTYGMTSQTPIIKSGGGKFYFHNNSFYGFTFTLYEVDGAGSTPEIVRKNIYVGPKSNSPVIDVSDFTDGANKKAELVLFKGNDTYITVTCYD
340	NZ_CP023665.1	2905415	2905873	-	56672551	CP943_RS14820	WP_026579215.1	152	MULTISPECIES: hypothetical protein	>WP_026579215.1 MULTISPECIES: hypothetical protein [Bacillus] MRLFICALCLFGMIVPTIETKALTFEELPVKQASKQWEVQIGKAEAKNGMAKPEKGRFHTYAVEIKNIGHDIASAEIYLYRNEPNSSTKFSLWNIPHDNAVSLAKSLNDGSPVKHRNLLLAENATELEVDLIWTEKGSEGRLLKESFIFKGR
341	NZ_CP023665.1	2919134	2920078	+	56672566	CP943_RS14895	WP_020452371.1	314	MULTISPECIES: hypothetical protein	>WP_020452371.1 MULTISPECIES: hypothetical protein [Bacillus] MHSQFETRAEHLTKHARFFEYTTASDPIGSGIISPIPVKEFGPELYETGETRIIPLDISEELKTEYPASSPSLLAHFIKIRSGDTIHTAPRATSELYYIVSGAGRTEAGEDTIHWQKGDFLTLPAGSSSQHTAAEDAAIYYITDSPLLHYLGVKPSESRFQPTIYTAEQAKAKLAEAAAAPDARFRNRISVLLNNDIFDQTLTITHVLWAMFGIVPPGSNQAPHSHKSVALDFVAYAAPGTYTLVGSKIDPATKEIIDPKRIDWVTGKAFITPPGLWHSHHNESGEAAYIIPIQDAGLQTYLRTLDIQFQHYEK
342	NZ_CP023665.1	2986629	2986955	-	56672632	CP943_RS15225	WP_023855405.1	108	MULTISPECIES: hypothetical protein	>WP_023855405.1 MULTISPECIES: hypothetical protein [Bacillus] MAEQRENEKPFTAIDAGAQDQETAQVIEKINSFITGFGQSINELVQKNSGIDLREADLTKSENAEMNQAVQNIISEYIQNINSLNADLSGKIGESINGIVTNKDQKDV
343	NZ_CP023665.1	3024125	3024610	+	56672672	CP943_RS15425	WP_035338224.1	161	MULTISPECIES: hypothetical protein	>WP_035338224.1 MULTISPECIES: hypothetical protein [Bacillus] MKKKSVLLPLLLIAVAVYAFLRSGRINLFDGQEEWSVLAGLIGLALFYQGQKEADSAHSFAGLFMTAIGVYFTFKEDYFSRADDFAVIVLILGAALLVKSFKTKEYQYESLLMIAVALYLYFFRQIAAWLKTANIETAYVEAYWPAAFIAVSLLLLFLKRK
344	NZ_CP023665.1	3045978	3046469	-	56672690	CP943_RS15515	WP_031304790.1	163	MULTISPECIES: hypothetical protein	>WP_031304790.1 MULTISPECIES: hypothetical protein [Bacillus] MTKQQQNQQQKQKQQKQKHEQLLGVNITDTELAQEFGNIQQQLAQLEQTVNQMGSQQQGQSGQQSSQLSQGINQLKQQIQQFSSQSQQQMQQTDQQIQQSIQQAVQQLNQALQGIQTNQAMNQMSQALQQAQQSFNQQGQQGQQGQQNQQNQQHNQNFQQPLQ
345	NZ_CP023665.1	3103959	3104360	+	56672744	CP943_RS15790	WP_023855473.1	133	MULTISPECIES: hypothetical protein	>WP_023855473.1 MULTISPECIES: hypothetical protein [Bacillus] MIVIILRLALLALLVYVVYRAVQFLGSPDRRLKSAQAKKHFYFLDEQKNARKNLKLTFKGVLFEGEKHIPSKDHPLFIHTIFVWTEAPEEKLSSFTEEDFAELEENIKAHYPDCKIDWDSNIQKWRNKKAEEQ
346	NZ_CP023665.1	3119960	3120352	-	56672762	CP943_RS15880	WP_020452544.1	130	MULTISPECIES: hypothetical protein	>WP_020452544.1 MULTISPECIES: hypothetical protein [Bacillus] MSLFQNIHRFFSTHAETSDRHPSDKLKSRYYKAASKEALNAVKEVLEGLDGCKVTSVSEERGEISAEVKKTRKAFVVATVVSIRPFDTAVDFNVSTETFLPTDFGYSRGLVSTLYSELDGKLQKSVHSNN
347	NZ_CP023665.1	3150125	3150628	+	56672787	CP943_RS16015	WP_020452566.1	167	MULTISPECIES: hypothetical protein	>WP_020452566.1 MULTISPECIES: hypothetical protein [Bacillus] MRIPPYYKKPGWQRFFAGMMCGAIISWVVFLFTYGTFQEKQVVLIREQKERINDLNDQITIYREDLHKLNEDNKRKLLIQSVDVKLINGKQYKLSQPDMMNFEERIRDNISDVITKDIESVYRTKELLKRTIENKEYTINDKTYKAKVTELTIYTRLSVEIKISFSE
348	NZ_CP023665.1	3180407	3180838	-	56672818	CP943_RS16170	WP_020452597.1	143	MULTISPECIES: hypothetical protein	>WP_020452597.1 MULTISPECIES: hypothetical protein [Bacillus] MKKITLLAFVGIMVFGFIFMGTGKTAEAVSKTTSFTYHSGIGDAKSYIHTSENYINVYATVELGRVGTWGTAAYCKLYLQRYTGGSWKTIDTASGDAEYGKKLNVTFSNIAKKSASTRVKVKLYNNWKHSELMQTVYSSKWTR
349	NZ_CP023665.1	3192376	3192951	-	69284706	CP943_RS22730	WP_234026546.1	191	hypothetical protein	>WP_234026546.1 hypothetical protein [Bacillus paralicheniformis] MNTELKDMLQSVLKEELSPINQRLDGIDKRLDKIDARFVEVDKRFDEVDARFAEIDKRFDEVDARFAEIDKRFDEVDARFVEIDKRFDEVDARFVGVDKRFNAIDKRFKEIDGRLNKVENRLNAMDKRLNRLETDIDELKRGQERLPKTIIENIGQFTENIVEHADDKAAALNDRVFSVETAIQRIYRLSS
350	NZ_CP023665.1	3211164	3212105	-	56672848	CP943_RS16320	WP_026579059.1	313	MULTISPECIES: hypothetical protein	>WP_026579059.1 MULTISPECIES: hypothetical protein [Bacillus] MAQIIKIQDCISRYEQDPYHYINQFIRLKKQRWQSIKEIAEKKKDSLHYDKEAADDEAVGKRKKTFTLKRKKEASDINKGKEADEWFNGLDGETDESLIARIPAAGEELVSFFKEYVYEFQLKWASSTISDISRLSREIKSDKILHILAQQLPDSYFIMYRPVLQVNQAAVELSVLILTPLEIYCISFLEGEKDSAFIGSKDRFWKEKTVRGRERSLLNPAVELLRTGTVLSGLLKGSGIELPVRKVVVSRTSYIDYPEPPYGISICDKRHWKEWLEKQQKNFAPIKSQQLKTAKILLSHGVSDSMRRQEWLS
351	NZ_CP023665.1	3225828	3226349	+	56672862	CP943_RS16390	WP_103750243.1	173	hypothetical protein	>WP_103750243.1 hypothetical protein [Bacillus paralicheniformis] MENLILKNLRECGYKLKKLISFISLATVALFFILPNISFASTFTNAGPSDPETIYGYSGKNTWSQKGYWDLTNLDSIPDTAVVESLKLNWSVNFNSGMNYANTYVALFDEKGNGSYMDTGTANPYFKGEKVKQKWSTQFYVTKALYPTYIKPKLYIFWNDTVSAQGGSFSIEN
352	NZ_CP023665.1	3227295	3228413	-	56672865	CP943_RS16405	WP_023855527.1	372	MULTISPECIES: hypothetical protein	>WP_023855527.1 MULTISPECIES: hypothetical protein [Bacillus] MNEEVEAKAAYEKAAGLLNQWYTMIKRHEALQAVSLRYEIRNLLSKMEKNRDLELYFQLLDYRCKLMMEQFAESAELFRKIKRQKETVKNADDIIQYYFFFFSGMYEFYEKNYLEAISCYKKAEMKLHKLTDEIEKAEFYYKLATAYYQIDDHFRSLNYSEKALSLFSKHKEYIDKTIGCEMILGSVQFELFRIKQAEEHYGRALDQAVSLQNRRIIGLIYHNMGLNYAKCSMPLLAEEHFRKALSIGVHEQSVFGINTLFELSHLMYKNGSPEEARRLCKEGFTRAAEQGEDEYAAKFRLIFALYDAGHPLDIELSLEYMSDKRLWPHVAELTKDI…
353	NZ_CP023665.1	3230875	3231363	-	56672869	CP943_RS16425	WP_059231740.1	162	MULTISPECIES: hypothetical protein	>WP_059231740.1 MULTISPECIES: hypothetical protein [Bacillus] MKNFAFSVLLFAAVLLFSSCGKDGGGGTDVLIFSDAPAEIKENVQRAAGKEQLNITVFPAAPEKLLVEIA AKEGDLFIVPEDMFKPFYDPEGLQPLKVASKEKEPYSALGKNGDVQLYAAVIEKGEKRLNGYTFQLNTDM AAFIPVYAKKTPEAMELIEALR
354	NZ_CP023665.1	3249125	3249805	+	56672884	CP943_RS16500	WP_105981156.1	226	hypothetical protein	>WP_105981156.1 hypothetical protein [Bacillus paralicheniformis] MESIMLIGFLSFIFSICYLVFHLIRRIFSPGKRFSRKLFYPCFAGGLLLLIISAPYYSEETYAVNETKTEDLTTELQELKTEHSAVQKEQTALKQQLNQANEKLKAAKTENDTLKKENEKLTKEKDSLTKKTKSLSEKLAKAEEKSGSAEATVKEKNATAQAGTSHSAPSPKKNSGESKQECKIKGSVNHIYHTPGSTYYDRTKNVARWFCTEQEARDAGYRPPKR
355	NZ_CP023665.1	3273686	3274009	-	56672909	CP943_RS16625	WP_020452678.1	107	MULTISPECIES: hypothetical protein	>WP_020452678.1 MULTISPECIES: hypothetical protein [Bacillus] MEKRTYYVSVQDGMISQSSDASPWEFQISATDDDIIILREYFDQLYSEDWINFFRAHVPAVEYHYDSANDKMDELRKDIYSMLYRLGNEETKSFISENGLAELNSAD
356	NZ_CP023665.1	3330076	3330699	-	56672981	CP943_RS16990	WP_105981168.1	207	hypothetical protein	>WP_105981168.1 hypothetical protein [Bacillus paralicheniformis] MHNLLKENLGEDYAVISHAEENKIGVYQKFNNCIYQETFVELQENTENNIYYLILNQRGNEFIKEQFDNKEEGICALGIYAVSILGDRIRDIETQDKILELEDNEIKSLNNLLDLKIGENFFSIFKEKKISVNLEQTKNGLYNIFYMTPDFKKVYLIKDREAPSAFLVLYNFSLKLKEVISLLNLWKNDFNINMQFEEKIRRLILGK
357	NZ_CP023665.1	3330868	3331503	-	56672982	CP943_RS16995	WP_075212930.1	211	hypothetical protein	>WP_075212930.1 hypothetical protein [Bacillus paralicheniformis] MNINQAHKILNKLGKSTTLEDSCIKENVAPYENFYILKKDKDKWVYGLFMVERQNNPYLEITKEFYNEVEGAKHFFLDRLSSFYFLEKFQLFVMEHEELDIGGPTFDQSKLFQAMSILGIPASLFALGQLQVKNRAIMLEMEDEASSIVSFVNNKGNVIQSTVAIQNQRALFIAFKKVYLLYQFENEVKNLLEAEGIANNFSEGDISTFLL
358	NZ_CP023665.1	3334325	3334648	-	56672987	CP943_RS17020	WP_003184717.1	107	MULTISPECIES: hypothetical protein	>WP_003184717.1 MULTISPECIES: hypothetical protein [Bacillus] MNAEGGAGGGGTNIHLEFEEMITISNKLKSICDIYTEGVQKEIKNLSESDFYKAGQASKAIESYADILGKTMELFDNYCIASHIVSYAMEKMYETDKELQKLYKIQK
359	NZ_CP023665.1	3335739	3336098	-	56672990	CP943_RS17035	WP_023856112.1	119	MULTISPECIES: hypothetical protein	>WP_023856112.1 MULTISPECIES: hypothetical protein [Bacillus] MSEGFWDSVGNFLHISYTENERKRDEYKNLYDFLSDKESDVKTKLAEVDASLKAYNSNLPDLKIPSHEFEDTRHEKDAKLKELVKHFKDMVDDIQSAKSKAKSKWEYYKAKAEAEEKKA
360	NZ_CP023665.1	3339548	3340096	+	56672994	CP943_RS17055	WP_023856115.1	182	MULTISPECIES: hypothetical protein	>WP_023856115.1 MULTISPECIES: hypothetical protein [Bacillus] MRNCFLSIWSVIDPFYYFFSRLTLIDQTKSSIFRVRLTRYKGIDVVLNDGTVIKKNDVLIKIHLHNIKLIKELQNIESAVRRGILIYQKAYFSMPILAEYVKNHHRTDQIKGIIGITTLHKGVERLGFEAVEPANQFYRVFKKLTQIPILYLTTKQFSLRKIPPSQYLFISKEKLFKSYLQK
361	NZ_CP023665.1	3356184	3356858	+	56673008	CP943_RS17125	WP_016886100.1	224	MULTISPECIES: hypothetical protein	>WP_016886100.1 MULTISPECIES: hypothetical protein [Bacillus] MNQETIIGLSKIEKTLYWIIPPVLGAVLGWFLPVIADWVLTIPIVPFKGPLEFITSLNNFWVSIIAAVIGIVAGLFFSQYIFTEILQVFISDQNVKLLFKEKEVVIEKKDISAVYLENKDLVVLDHKGTELYREQLESKRALAESAFKHHGYKWADEDPFKNEYQRWVADHPDFPSHINTLLLARERALLDNKHEEAKILRKDLAKLGVVIQDEDKRQYVRMVS
362	NZ_CP023665.1	3364191	3364781	+	56673019	CP943_RS17180	WP_095240270.1	196	MULTISPECIES: hypothetical protein	>WP_095240270.1 MULTISPECIES: hypothetical protein [Bacillus] MKKILLVLFLVLAGCSSAPQNKTDNQTAAAEEKTETTEAKSDFGFTLNEFIDEYNKQIDNGIYDGKEKIPSHLQKDEDFFKVDGGSYVQILAKETDNDAEHKSYTLSSIHNKDKELMGINFRISTAFDKDKVLHFSSTGTLAGYKLMKTLNFEEETLQTAFKEADPEYSISNEICNLTLKYQLKKSAIIIEIRPPK
363	NZ_CP023665.1	3367640	3367975	+	56673023	CP943_RS17205	WP_105979937.1	111	MULTISPECIES: hypothetical protein	>WP_105979937.1 MULTISPECIES: hypothetical protein [Bacillus] MEYNSLIKTLDEYGGRELRLEWENGLKIIGNPDTLYETDNGLEDDDINYTEYYAVAFRVNNIISHPTNNKGSVYDWLRQGESSLVEISLYDDPPNKILVDGQTVWELDNNE
364	NZ_CP023665.1	3369866	3370189	-	56673028	CP943_RS17230	WP_080627007.1	107	MULTISPECIES: hypothetical protein	>WP_080627007.1 MULTISPECIES: hypothetical protein [Bacillus subtilis group] MKNIFKYDKETFLLIDNDIIQPDDQGNYEIPDGWTDIPFDPGLYLPKFFPDEKVWKETATKEYIESLQPPEPEPDITDLLKKQIALLSLQIARLQADVEASKGGGAS
365	NZ_CP023665.1	3380893	3381228	-	56673035	CP943_RS17265	WP_105979929.1	111	MULTISPECIES: hypothetical protein	>WP_105979929.1 MULTISPECIES: hypothetical protein [Bacillus subtilis group] MEPISINIRINGKNKKFVTPNFISGKLFRDAAEIAEDIESTDPERIYTEKQIEFICAAFGNKFSADEFENGIDARLVTRTIYGTANYVLGNIAEASQILNPDPKDGEEPGK
366	NZ_CP023665.1	3391402	3391860	-	56673051	CP943_RS17350	WP_020450347.1	152	MULTISPECIES: hypothetical protein	>WP_020450347.1 MULTISPECIES: hypothetical protein [Bacillus subtilis group] MFLLDNILYILLAMAMLFLLFTFLNIYTFGKDLLTSVFLTVIFFDLFFKMPFKAVNIVYSERKKLLENLEKDTKLTDEQKNKIRHILGRRSRIFLTLYRAGEFSYTDLLISLTEWYKNKPFKVRISVAKQRKKSYENKYLSDMKKDLTCIEV
367	NZ_CP023665.1	3391867	3392346	-	56673052	CP943_RS17355	WP_020450346.1	159	MULTISPECIES: hypothetical protein	>WP_020450346.1 MULTISPECIES: hypothetical protein [Bacillus subtilis group] MRSVKSIIFVVGLILANYVGGIPQDARNLFITQTIFFSPYLVDFYPILKKLLNRPLKILAGLIWAAGISILLANILGITGIITIIDSKISFVQDYVSPISLNLKVKTYLLIACVVYTAVFVGSITLNYTIAFDEYLKKKKMNKKQKQHASNKEVVLERG
368	NZ_CP023665.1	3393614	3394129	-	56673054	CP943_RS17365	WP_105981186.1	171	hypothetical protein	>WP_105981186.1 hypothetical protein [Bacillus paralicheniformis] MAFVGFEESAEVRQLAESLIDEHHPHLKDAKEHVGFYIREGNSKWAGKAKKCTAFERHMTDYMLFVFINKEAWKTMNQEQRAALVDHELCHFTRVEWEEPDPNDSSKWVTMYGPGEDPDSWGIREHDVEEFSEIIERHGLWEKGIESFAAAVREADYQMNIDDVHRLQRVK
369	NZ_CP023665.1	3394835	3395272	-	56673057	CP943_RS17380	WP_105981189.1	145	hypothetical protein	>WP_105981189.1 hypothetical protein [Bacillus paralicheniformis] MHPKQICDDLAFLGSPLVLDGDDLYIENPENVYPELVEFVQSHKKRIIQYLKGEYSMQDHKIKQTIDKIINYFMGIDQEMNPKIDDWFNHEWDAATKAARLLVLFWENGWRALNSSVSNFEDEETDKLSLEIYERAMSYFKGKKA
370	NZ_CP023665.1	3410505	3410951	-	56673077	CP943_RS17480	WP_095323676.1	148	MULTISPECIES: hypothetical protein	>WP_095323676.1 MULTISPECIES: hypothetical protein [Bacillus] MSWYIRPVFLVALAYFCYRRTWKGVIVTFLLMTSSMFWFPVPERINPEMQAVLDYEQMLLSNPLSAVLTLAFMMGFLVLIGAAFWKRSLGWGLAVLNVTLIGKVVLSVMLTGENGWAPLGNTVFGLILVNGIGLLLIAWRRKRRQAGR
371	NZ_CP023665.1	3444323	3445786	+	56673116	CP943_RS17685	WP_105981199.1	487	hypothetical protein	>WP_105981199.1 hypothetical protein [Bacillus paralicheniformis] MKKLVLLMLVLLVVYPHVSKAGGFKGGGGDPGHWFAGDPVEHPDPAKPPIVFVHGLNGSSSAWFDENDMAEQAWKNGYDAAFIDLHPDKDMQDNGAMLAAKLREIYQHFGRKVILVSYSKGGIDSQSALIHHNAYHYVERLITLGTPHHGSQLADLAYSSWAGWLADILGQKNAAVYSLQTGFMKSFRDQTDNHPNRSKTKYFTLAGNKIGGFGSVLFFGGVYLNMFGENDGAVTEKNARLPYATNLNTGKWDHFSIIKGNLTFPVFMPLLTVQAYANETAAIKENLSYPFIRGGENHGLREEEFAVEKGVKEITVHWLSNHSSGNIKLTDPH…
372	NZ_CP023665.1	3447222	3447677	-	56673119	CP943_RS17700	WP_023856164.1	151	MULTISPECIES: hypothetical protein	>WP_023856164.1 MULTISPECIES: hypothetical protein [Bacillus] MKNPRFYKVLSAWLAFALASIWLLMLVAVHGLLILESIFYYIVVICTLGIILLIYPSMREGHDQAMADFVHYGYGLLGSGVALAIMIFALIRILKGKCGSWTQGLLVFGAALQLIVFEWFSLLTAVFYVLAAFLPEQKTAALEKQADESVQ
373	NZ_CP023665.1	3500852	3501385	-	56673175	CP943_RS17980	WP_065643725.1	177	hypothetical protein	>WP_065643725.1 hypothetical protein [Bacillus paralicheniformis] MIGLLIIACEIGFWIFILLGLIFRYMAGWKKAGLIMFACTPVLDLLLLAATALDLYNGAQADVLHGLAAVYIGVSIAFGSRMIKWADERFAYRFAGGPKPDKGPQYGKEHAKKERKGWLRHFIAWLIGAALLAGMHLFIGDPERTEPLIRIASLWSIILAIDFLYSFSFTLFPKKAR
374	NZ_CP023665.1	3513745	3514128	-	56673187	CP943_RS18040	WP_023856206.1	127	MULTISPECIES: hypothetical protein	>WP_023856206.1 MULTISPECIES: hypothetical protein [Bacillus] MKMLKKAVLTAAVFLLAAFAGSTEAFAMPSKGAVKFRTDANTYTKSATSIVVTGKSPVTGTMIAVRLINKKGTVLIYRDVHLTRGKSHFRVSFPTKKLKPGKYDVWVDAVKGKKWHGELKRYIVIKH
375	NZ_CP023665.1	3556850	3557239	+	56673232	CP943_RS18265	WP_224146402.1	129	hypothetical protein	>WP_224146402.1 hypothetical protein [Bacillus paralicheniformis] MSLKRILHMTGIFLIAAAVILSGFIISDVAYDPFMEDSQSMLFFTIGTYLTTPFFCFIGGFILLGIGKLIDLQEKHNAIVTERLNIIYQNGTAGEHAREENETAQLTARTVETDSFTLPADEDRKYWNG
376	NZ_CP023665.1	3636951	3637358	-	56673305	CP943_RS18630	WP_158700707.1	135	hypothetical protein	>WP_158700707.1 hypothetical protein [Bacillus paralicheniformis] MRAVFYSSCPLLLKNMSLYIKRLKADFQPFVVDQYVPKTVSRRDKKRHHHDASAFLKSDILFSKVKTFHIPAPLRLPAVGGFLFIDRLKQLYHKMASEKSAYKTKQNMLLFKQTYSKINKQKRSDTYGGIFMVRN
377	NZ_CP023665.1	3657762	3658142	+	56673326	CP943_RS18735	WP_023856311.1	126	MULTISPECIES: hypothetical protein	>WP_023856311.1 MULTISPECIES: hypothetical protein [Bacillus] MNNAILKKLHPHIEEEVTLEINGFEFTGFSTICPYVIEEGREYPVFISFTILDQSDLLELDKEIKELARIDDSYRYYIRGILHEDYIDAGIKIYDDNGYFNDYKYLAGKPVELLVDRIAVDFLDNN
378	NZ_CP023665.1	3678186	3678575	+	56673350	CP943_RS18855	WP_020452999.1	129	MULTISPECIES: hypothetical protein	>WP_020452999.1 MULTISPECIES: hypothetical protein [Bacillus] MKNLALSILYLLGFVMLSSWSASFGEMFGVNVSAIPQFILAMLFTLIIGGYTGLPLIYIKFKRSETLFFTNQKVFLITLGLGVLLSCAAYSLQQTLSSIAIALLSIIGFLIIGISGFLPAWLLKPVKSL
379	NZ_CP023665.1	3690629	3691102	+	56673360	CP943_RS18915	WP_105981243.1	157	hypothetical protein	>WP_105981243.1 hypothetical protein [Bacillus paralicheniformis] MKKLSFMVILSVLTLVFGSSSVSFAKNIPEDRYTTPTDAEFSQMKEILNNDDIETGNLQKDYGVIVNDPAEKVGVISDIPAEKDDWSHVSFHSYYVDLNSNTLIADVQFEFTQNDDGISETEYKNVTNGGRYFVKMDQDGNVIDEETTGDMSILGKY
380	NZ_CP023665.1	3779158	3779511	-	56673450	CP943_RS19365	WP_003185659.1	117	MULTISPECIES: hypothetical protein	>WP_003185659.1 MULTISPECIES: hypothetical protein [Bacillus] MKRASIVREKKYYELVEQLKVRSQDVTFSATKAVGLLMLFSRYLVNYTSVESVEDINEDCAELYFNYLMDNHKRLGINLTDIKRSMQLIGDILDVEVNHYLKDFSLSNVTLWMSQEK
381	NZ_CP023665.1	3791960	3792337	-	56673461	CP943_RS19425	WP_020453101.1	125	MULTISPECIES: hypothetical protein	>WP_020453101.1 MULTISPECIES: hypothetical protein [Bacillus] MTSTDDYMLLTTYYQLLFTIEEGFCYLIEANQDLAKTEGERIFNDLIYAFFQLDSSHAVLLSILETSCAKSSIRFFDRVFREFDSLIYYNYPSAEFQHDLTHHFLPLYREWMKTIHQCMRPYVIH
382	NZ_CP023665.1	3795222	3795605	+	56673466	CP943_RS19450	WP_026580170.1	127	MULTISPECIES: hypothetical protein	>WP_026580170.1 MULTISPECIES: hypothetical protein [Bacillus] MKKIFVSLALAFVLSFSFYSSSKAAVLARVAVYPGEVRQSADIFRGVGEGDFRCRFYNATRLGGGTCSLYEITPDGRNTLVASSSVDYSLQQEIQTVYTDPDHLYYIKGKNSALSGTRTLIISDFSN
383	NZ_CP023665.1	3809317	3809685	-	56673484	CP943_RS19540	WP_105981256.1	122	hypothetical protein	>WP_105981256.1 hypothetical protein [Bacillus paralicheniformis] MDDHHLGQIEQIMKALYKSWSSDSSSKWSQDNPAKGQCSVTALIVYDLLGGEIRKTKLPEGWHFYNVINGKRYDLTISQFKEDILYMDVPSNTDTNEKQYNYLKQSVINQLSFSKERGTLNI
384	NZ_CP023665.1	3812986	3813660	-	56673488	CP943_RS19560	WP_035337789.1	224	MULTISPECIES: hypothetical protein	>WP_035337789.1 MULTISPECIES: hypothetical protein [Bacillus] MNLIKRIAGRVKKFIVAIIALPLILGLVGYFMPKGSVAPSDYTATVTISTGNYGEAKYNNAKQVPLLLKNEAFLKDIFPDMPEEDLAQLKDDLAIEIRTDSLFNLSYTGPDKQKTLDTLGKVKDAYMKGDKALFSKREEVIEKNIKALEGETVSADSKVDKQRFLYELETSRLDMKAAEEIEPLIVLDNQAAGMSPKKRAVLGVLIGLALSFFIIVVPEVFRER
385	NZ_CP023665.1	3824996	3825316	-	56673497	CP943_RS19605	WP_026580185.1	106	MULTISPECIES: hypothetical protein	>WP_026580185.1 MULTISPECIES: hypothetical protein [Bacillus] MKKLIVLTLSMLLLLSACGTSGQSEDKSSTNNKNAASEETVTKEGSFVGLADSHTIAVNIDGKETTLQVDEDLQDKVNSIEEGKKVEVQYKKGGNGVLELKSIETK
386	NZ_CP023665.1	3890410	3891075	-	56673552	CP943_RS19890	WP_026580209.1	221	MULTISPECIES: hypothetical protein	>WP_026580209.1 MULTISPECIES: hypothetical protein [Bacillus] MEIHKDKPGTLFFVFFGLLSFVGTMSLYDRFGNLQMKMLAASDNLLFCSDVSIFYSLLLTFICIPYTVRKVITSKGYQGRLQLPLSLILLVVGLTLLCNGFFQYQNIGKNSIVMREGLISSTKHYDMEDVTSVHAYYQKGLKGALYLKYDLTLNDGKKIDAALSDEFYNKADELDKLLQRQGIHIERSGIKKKDQAQLEKHAGSKANYKVVKRILTGTNHR
387	NZ_CP023665.1	3899738	3900109	-	56673564	CP943_RS19950	WP_023857133.1	123	MULTISPECIES: hypothetical protein	>WP_023857133.1 MULTISPECIES: hypothetical protein [Bacillus] MNHFFLKEVFVIASNPAADCRQYMPMICFSAGNKKHEISTYANEGIVFRYETKDRMEIYEFQVTIKQKELSFRLYAWDGGSYVRVYSERWLASPVFFQFLKNTYFSNNNEMIFLINGRKKQKL
388	NZ_CP023665.1	3917246	3917629	+	56673586	CP943_RS20060	WP_103749405.1	127	hypothetical protein	>WP_103749405.1 hypothetical protein [Bacillus paralicheniformis] MKRIVMTLFTTTLLVFVFFTGSSDAFAMTSKGAIKFQTDANTYSKRATSIVVTGTLDRLNNGAGVYLVNKAGKTVKYASVDCCNKRSFRVSFSTKSIPAGKYDVIVTTNWGTRNYIGELKHYITVQH
389	NZ_CP023665.1	3945244	3945723	-	56673609	CP943_RS20175	WP_023857096.1	159	MULTISPECIES: hypothetical protein	>WP_023857096.1 MULTISPECIES: hypothetical protein [Bacillus] MFGLQDIVKFFWSFLIVFPAVSVLHVLGHSVMAVLFGGKSSLEIGMGKKLLKIGPVQIRSVYFMDSFCKYGDLKYDNRFTNAMIYAGGSLFNLASIFIVNLLIIKDIIPENIFFYQFVYFSTYYVFFALIPVRYSENHLSDGMAIYKVLRYGEKYEINN
390	NZ_CP023665.1	3970963	3971406	-	56673637	CP943_RS20315	WP_023857076.1	147	MULTISPECIES: hypothetical protein	>WP_023857076.1 MULTISPECIES: hypothetical protein [Bacillus] MFYQLRLAEMKDMNAIEAFLKKAGTSHKGIEEAKSQFIMMEDPPDEIVACLGMEEFENKKGLLRSLVVSDKLSQGHIVSLFQSMQVLCEKRGIQTLYLVANKRTSMDFLEVLGFKQAAAIPEELDGSEHVSDSLSVNGAVLMEKTSN
391	NZ_CP023665.1	4132042	4132515	+	56673792	CP943_RS21110	WP_023856950.1	157	MULTISPECIES: hypothetical protein	>WP_023856950.1 MULTISPECIES: hypothetical protein [Bacillus] MLKRKFIGKMGVGLLTSAALFSFILPTEEASATFFRNAPTLHVETVDSNKEWTTSDIEVTYKPNSFVGASYVEFNFPYRFHANTRDSLNGRTLNYTQILNDGQTVRVPVYAFSSSAFKLVMVRKTLPNAGTHRVTAELQKFGRNYNHAEATVDILPR
392	NZ_CP023665.1	4138221	4138652	-	56673801	CP943_RS21155	WP_026580310.1	143	MULTISPECIES: hypothetical protein	>WP_026580310.1 MULTISPECIES: hypothetical protein [Bacillus] MLKKLAAVVFMLGIMLCGAGGTSVLAYGKSISQESIHPYSTAYTDVKVVGKTVRFYIKGLESPFNQTYYERVAWTSTDEEPDTLKDNILSVKIPAKTGSRYEANSSERLELIREKVNSGDMVYGWAKAQNGNWYPAGSAKISY
393	NZ_CP023665.1	4152273	4152614	+	56674036	CP943_RS22355	WP_155121659.1	113	MULTISPECIES: hypothetical protein	>WP_155121659.1 MULTISPECIES: hypothetical protein [Bacillus] MRKMPLIPAEHFVIQRLRFSAQSLADQKNTVICNQTNSALSFSLKTPDGKSCYFVQSVKSSLSLLRTSFIYAFMQHLLITLRIYLLAAVSLPVELFLKHRSLRLLRMDGIFIT
394	NZ_CP023665.1	4176230	4176877	-	56673835	CP943_RS21330	WP_020453459.1	215	MULTISPECIES: hypothetical protein	>WP_020453459.1 MULTISPECIES: hypothetical protein [Bacillus] MRTLTKSQYFFKLHPLMVPAGWTVKENHLYQKPIRDPRRTLFTLENETSGKMVQVEYAGELKYVIRMLNADQTLVSEDSDTPYEQLVERLEDRIRASGGARNLLRLRIPAGWTVVHHSLTDTNPDELAPDSKAWRSDFKRDLLKLRHEEECLLLDIEWYPECSPAGHYALKLIKNGNWNSPLEDMLCIHPKELAYEIHAVLKKTCEHQYVDEAGA
395	NZ_CP023665.1	4192376	4192789	-	56673849	CP943_RS21410	WP_025810569.1	137	MULTISPECIES: hypothetical protein	>WP_025810569.1 MULTISPECIES: hypothetical protein [Bacillus] MAKGYTNEGTKWEFAHSFWLVFTWVPFGFLSWFAFIYIAARTKQRKWLFAGIGYAVAVLFAAFTARTFLFDLAMKALLIVWIISIIHAFKTRAEYLVRLEAVYRIKRSSMNELREELKYEQEPHGQTGTSKVTLTKK
396	NZ_CP023665.1	4209319	4210482	-	56673863	CP943_RS21485	WP_105981311.1	387	hypothetical protein	>WP_105981311.1 hypothetical protein [Bacillus paralicheniformis] MIRKRFINLSALIVLLLVITGCGKGQNQEITYKKGFPKEDSRGLTEFMKSYLTGSTDKKIIEVNDVTLFSTVNHQGQAMRYFQYTQDQLKEYYKPLFTAKEPKKTLNNLYQIERLEKLLHHPIQDKEKYHLPAIKMLPNNQLEVKTKKNKKTLDLPQLLKNYGVKKSDELEINLYAVNSKCFSVVIQDFSMKDRINSTIGLFITQDLTNIESTVITKEKLQNTLSTGKLKDYYDLFTKVDKSGRYSLLFFDDMILDKRTNQLIDIKKDDYLSKDGKYVFINGAKEKETNVMPEGIQQIQTVDNYLKGNEKYEAQFKIDFKQIAKEMDFNAGDA…
397	NZ_CP023665.1	4211945	4212583	-	56673865	CP943_RS21495	WP_020453490.1	212	MULTISPECIES: hypothetical protein	>WP_020453490.1 MULTISPECIES: hypothetical protein [Bacillus] MGHFRFNKELSHKAAGTISQLENAFSHVFENMVFFREELDRHSGKAAAALQKKMSDNINFFSKASSCLLYFADSVRCFAKAVELTDESDKPANVQPQSRSERNHTFSAERVQSEIKVNGESLHQATGKFESNLSTLDEVLHHFDTMLREMMYETEFPWEKFDDVWSDAKSHIKSIMTELKKRVKELSANAKNIIKELKRVDNVISQQLQRVK
398	NZ_CP023665.1	4232503	4233210	-	56673882	CP943_RS21580	WP_105981317.1	235	hypothetical protein	>WP_105981317.1 hypothetical protein [Bacillus paralicheniformis] MFLKEVQMVDEYGKGLQGESTCITEMFLWELGKTFKTNDCQAIFFICGDFEEMKLVKTVQEEPDMLCPKHSYEAEIPFDMPAFQKLQSYEKKVMMAGVLKEAMLFVAEQRNWDKAAVAKAFANMRKKDYKHQFKAWRPKMSTNFKLKAYPLVELDIYSFRLYLVIEDRKKNVIAKGLAAATETFIEDIAYYMNRLEWLSDDEAVIYTMAHKHSYFSLRVNGSSKFVKQQKENDTQ
399	NZ_CP023665.1	4233224	4233790	-	56673883	CP943_RS21585	WP_095291275.1	188	MULTISPECIES: hypothetical protein	>WP_095291275.1 MULTISPECIES: hypothetical protein [Bacillus] MYRKGDGKNSSELHLFRQAADKLLNAEKEFPNLVFRQKFRYFCFEEFHWVLSDDSWHMLSQLAAASGDEYIVMGGIEEWSDTWVKLPVDMSSEAYLSVLTKGSDQNEDMITLASRVVWMSPSQKWVIYGSRTFEICVIGFNDDALKESLKSWQPLNDIVLGWISVIFYNQTIPPDFQEIFQRHYGEKM
400	NZ_CP023665.1	4234554	4234907	-	56673885	CP943_RS21595	WP_026580354.1	117	MULTISPECIES: hypothetical protein	>WP_026580354.1 MULTISPECIES: hypothetical protein [Bacillus] MKKRYRYYRLDADTVNQLKDMDKRLSGPLPADLDAFEQDGHGLSGDFYEYFALVAGSLGYVLADKKMPKVQRQSLEKTFFEVYPKNKIENYPETFHVVAMHENVRRLLCSIVNRRKT
401	NZ_CP023665.1	4235098	4235571	-	56673886	CP943_RS21600	WP_229129193.1	157	MULTISPECIES: hypothetical protein	>WP_229129193.1 MULTISPECIES: hypothetical protein [Bacillus] MCKLNTESLTSIGNLDVINLLHYHSLYSSDLLSNNGLITFFEHLDFNQILIEIMGTPDFIDEMNPFIEDKQFAVNALSKRLIHVECMLTKEELLERHKLTEYLSFLASINDFVVLVADPVNNKKYFNSVTQKVDVHIESKEKVIWFEFDATDVYVVE
402	NZ_CP023665.1	4235586	4236344	-	56673887	CP943_RS21605	WP_026580356.1	252	MULTISPECIES: hypothetical protein	>WP_026580356.1 MULTISPECIES: hypothetical protein [Bacillus] MQQRTFRLGKIDIYFPDSVIKKYWFYADVAALLNQETTEQAVSLIRKELKQRGFGRIAFDSEADGTSVSYRDGQKVFEVAAVINELYNPSFMVSQELRDSFKEEIANYKIPKGQNYKIGDKIIVPDSHNTYFHIMQMIDEYEGSAVCILFNKVYKGMDEAASAEIGKDLLKEHVFAAMCLQESYIIDYTFKVISSNHEPLARVLYTNRRNRLLDETFPDISIQELFELERNAANSDFMKESRQKLSYLTWIN
403	NZ_CP023665.1	4236669	4237343	-	56673889	CP943_RS21615	WP_051967027.1	224	MULTISPECIES: hypothetical protein	>WP_051967027.1 MULTISPECIES: hypothetical protein [Bacillus] MIKSREILSLLDGEFSELNRPIFEWRECNYIGSKCTLMRLNKDDWLLSIQCFQIDDKGPFLSIHAYSNSFSDNYSLIIMDDFSLTTKAGELVTYHESNLDQLSEVAKIEIVETLYCIKANQRNRYQKQTKEGAWKTYFRNLFEDPSFREALWIKPENLLNELGLQCDYEEVYETENWEYPDYLTSPSELVSFQSFAEYLETGQGPVCAGVPNNDWKQWEDYDID
404	NZ_CP023665.1	4237367	4238059	-	56673890	CP943_RS21620	WP_096748407.1	230	MULTISPECIES: hypothetical protein	>WP_096748407.1 MULTISPECIES: hypothetical protein [Bacillus] MLKNKEAILALLDDSFKKGEFPLLDNGNFDFVKGKLSVFVEGDNWLLTFQLFGLSKLGPAIDFHAMGNQVINHEASFLVDEPFAFLDEKGNKLELEDVETGFAKNPFSIVLREKVFHFFIEQKVQANINVENEWITCLRQMSKNRLFLDTLWLTKHEQLQTADLPLMYDQLYSTETWIHPETEKDLPSLSPFFESIAEAICRKKATYLSDYANGNTEWPMWASTDSVDYF
405	NZ_CP023665.1	4238242	4239003	-	56673891	CP943_RS21625	WP_026580359.1	253	MULTISPECIES: hypothetical protein	>WP_026580359.1 MULTISPECIES: hypothetical protein [Bacillus] MGIWEEEHKNKNIMIGDDGLDILHDAVEKFYKMSKEHLDREPALDEFFVTLLHVLNTNGDSFFPELNERQITDIKASTKKAKSLSKIVPGAIIEIPLEEINKYSYAWVLEGNLAKRKDDDVLIQYYDIFVDQKLSKAMIRDLLKEENKLFVANTSYTGFLQDDWKVVSKATQDLLKQYDESKLRFITYEEGKYFISEGKEGSLGGDDVLTEVDQKTGKAIYNPIGIFGHLCIETILMKYSNGISMEDIIKYET
406	NZ_CP023665.1	4247662	4248039	-	56673898	CP943_RS21660	WP_234026551.1	125	MULTISPECIES: hypothetical protein	>WP_234026551.1 MULTISPECIES: hypothetical protein [Bacillus] MAALKLMIYSGTLFNLALLFILSLLIVILVQSVIFIALEITAYVKIKKDPFSPWGSFILAMGIKNIFTNLSGIPFMAAGFILHKQQEPKDAVAQPPARRKARRNPALLMKKAAKARKHRNKGIKS
407	NZ_CP023665.1	4252545	4253141	-	56673902	CP943_RS21680	WP_105981320.1	198	hypothetical protein	>WP_105981320.1 hypothetical protein [Bacillus paralicheniformis] MFSIKKSGIFWMRSNAVFMLLVVLLLINIPYWNRDDSSISLFLFIFFAECFLVLLSLVYGFNTKKIYVSPRKKIFKKSNLIVGTITVIAISLFLSFVLREHIPYPSALLYMSLTINFIMAIISLLFPNWVIKQYEFNIYEESSGWINDFLRYFLFIAWAINYEVQVVLARLPFLLQRLMGIVFIIVLVFSIASISSMY
408	NZ_CP023665.1	4253165	4253938	-	56673903	CP943_RS21685	WP_105981321.1	257	hypothetical protein	>WP_105981321.1 hypothetical protein [Bacillus paralicheniformis] MSKIILTTNELVAALLLCRYEKAAEDIINEQKIIQDEKDIEPFSIQAENLLKQRGYWDDGTESNLQKGLENLIHLLIQSKRKVRCIHRKRVLIVHHVQKDELIVQEIENQNHSFSILRSRESFLEMLKTFYHSYTDKNPEHEIFEMDDDSFDEFHEVEAEVIKRMAEDPKTHPSISQFSFDFLKNNQELDNISFFESDYITSQSRLDQAVFLLRSDDFIWHLDYENIKKTGSLFLQPVAVNEYFEKIVNTMNEFFDL
409	NZ_CP023665.1	4261838	4262920	+	56673912	CP943_RS21730	WP_023856884.1	360	MULTISPECIES: hypothetical protein	>WP_023856884.1 MULTISPECIES: hypothetical protein [Bacillus] MRYIWIGMILCFLSASLAVGCIKAEDQSDDDKNDEALQPAEHFVYHHLMSDQGLIKTSFSDQPVYLSESLGLWMEFLISKKDGEHFHEQYQHLTESFLMKNNLVSWQIQNGQASGVNALIDDLRIMVSLDQAAALWGNSEYKQTALNIGSALKTHNMNNGILTDFYDSASQSASKDITLSYIMPDALSVLKKNGVIDKDTERRNANILYRAPLKNGFLPKVYSTETKAYTYDHEVNLIDQLYTAWHLPPKDQKAAVLADWLKQTFQTGGKLYGRYSIDTKKPAVQYESPSVYALAILFFINQNEDQDVIKALYDRMNDFEILDSSETYYGGYMSGND…
410	NZ_CP023665.1	4271399	4271965	-	56673919	CP943_RS21765	WP_020453535.1	188	MULTISPECIES: hypothetical protein	>WP_020453535.1 MULTISPECIES: hypothetical protein [Bacillus] MISTKVQEEQAVMIVHTLGPKGTNCEKAGLLWLKNKGVRGEVRLYETLEEALPHVKSTENSVLLGCAVYPFLHQIVFENLADLKIIDSFVMPTYNMVFAAKQHTMASDIQTVASHPAPAHLAKLFSSQVQFVTSNAQAALACASNAADGCITTIKAADEHRLKVIQDFGEVPMCFTIHGLKSIEGGSR
411	NZ_CP023665.1	4297153	4297614	-	56673941	CP943_RS21875	WP_020453557.1	153	MULTISPECIES: hypothetical protein	>WP_020453557.1 MULTISPECIES: hypothetical protein [Bacillus subtilis group] MAETNPVIKKLQFKDNGQPVLIVNPPEAYSGIMAEFQGHVDHQAEADRYDFVQVFAATNAKLQALAKEAERHLAEDGLFWLCYPKKSSKVYKGSDCSRDTVAGLLADQGYEPVRQIAIDEDWSALRFRKAENIKTMKRKFAVTEKGKQRTDQE
412	NZ_CP023665.1	4298772	4299173	-	56673943	CP943_RS21885	WP_026580384.1	133	hypothetical protein	>WP_026580384.1 hypothetical protein [Bacillus paralicheniformis] MSENQKAEQERKVGYEGFVLLLSLIFISIFITTSYEIPSNLLLIILFFIGSGYYSIRLVSKGLLRKKRGLGFKAGLFAFVVWMALSFLFHDISYPFTLEGLSFQILMFFLFYIPFFFIFQFAFKISNIQERKQ
413	NZ_CP023665.1	4353918	4354544	-	56673990	CP943_RS22125	WP_105981339.1	208	hypothetical protein	>WP_105981339.1 hypothetical protein [Bacillus paralicheniformis] MKMKETINICYIDDRIDYILDKYLDEYCKKQNEENEYGYQLKFTDYEFELTDNYKTLLSNNLINQANIIVIDSRLFENENSSLSKFTGEQFKIILRQILPFIKTIVISQNDSASDSLTIRKFKSTNSDQSSQEYYNKYLEPALKQNIIATIEEHQILNQLTLENEVDSLLIGTIQNTISGIRDTALFEKEDLDNLIKLFNEVKVKYGD
414	NZ_CP023665.1	4359205	4359675	-	56673996	CP943_RS22155	WP_020453614.1	156	MULTISPECIES: hypothetical protein	>WP_020453614.1 MULTISPECIES: hypothetical protein [Bacillus] MNDNVQTALKTLSNVKSRSIVSVFVLCLITLGVYIPYWFLSRKKSFDLLPYHDIPYTTLKAIIFYHLFSIPIRISAKIAFPDMHYSLYMLLDRVILILSAGVLIYCALVVTASLNKLSGKEPANGSIFAFLLNVIYIQHRINKLSEPKSEWLSKAS
